# Supplementary material for: Sewage treatment plant associated genetic differentiation in the blue mussel from the Baltic Sea and Swedish west coast
Source: PeerJ. 2016 Oct 27;4:e2628. doi: 10.7717/peerj.2628 (PMC5088577; doi:10.7717/peerj.2628)
Supplement: Data S1 — The raw data presented including all individuals analyzed, with sample name, sampling site, sampling location, pollution type, species identity coded as Mytilus trossulus (T), heterozygotes (H), Mytilus edulis (E), species identity coded as Mytilus trossulus (2), heterozygotes (1), Mytilus edulis (0), AFLP data with each marker coded with name and number. The data is divided into subsets, ALL representing the total data set, BP representing a subset of all individuals sampled from the Baltic Proper. STPREF representing a subset of all individuals sampled from the reference sites (REF) and sewage effluent affected sites (STP) in the total study area (ALL) and the Baltic Proper (BP). HARREF representing a subset of all individuals sampled from the reference sites (REF) and harbor sites (HAR) in the total study area (ALL) and the Baltic Proper (BP). [file peerj-04-2628-s005.xlsx]

## Sheet: ALL
SAMPLE	SITE	LOCATION	POLLUTION_TYPE	SPECIES	TROSSULUS	PrimH_1	PrimH_2	PrimH_3	PrimH_4	PrimH_5	PrimH_6	PrimH_7	PrimH_8	PrimH_9	PrimH_10	PrimH_13	PrimH_14	PrimH_18	PrimH_19	PrimH_21	PrimH_22	PrimH_23	PrimH_24	PrimH_25	PrimH_26	PrimH_27	PrimH_28	PrimH_29	PrimH_30	PrimH_31	PrimH_33	PrimH_35	PrimH_37	PrimH_38	PrimH_39	PrimH_40	PrimH_41	PrimH_42	PrimH_43	PrimH_44	PrimH_45	PrimH_46	PrimH_48	PrimH_49	PrimH_50	PrimH_51	PrimH_52	PrimH_54	PrimH_55
Ask_Har_01	ASK_HAR	ASK	HAR	H	1	0	0	0	0	0	0	0	0	0	0	0	1	0	0	1	0	0	1	0	1	0	0	1	0	0	1	0	0	0	1	0	0	1	1	0	0	0	1	0	1	1	0	1	0
Ask_Har_02	ASK_HAR	ASK	HAR	H	1	0	1	0	0	1	1	0	0	0	0	1	0	0	0	1	0	0	1	0	0	0	0	1	0	0	1	0	0	0	1	1	0	1	0	0	0	0	0	0	0	1	1	0	0
Ask_Har_03	ASK_HAR	ASK	HAR	E	0	0	0	0	0	0	0	0	0	1	0	1	0	0	0	0	0	0	0	0	0	1	0	0	1	0	1	0	0	0	1	1	0	1	0	0	0	0	0	0	1	1	0	0	0
Ask_Har_04	ASK_HAR	ASK	HAR	E	0	0	0	0	0	1	0	0	1	1	0	1	0	0	0	0	0	0	1	0	0	0	0	0	1	0	1	0	0	0	1	1	0	1	0	0	0	0	0	0	0	0	1	0	0
Ask_Har_05	ASK_HAR	ASK	HAR	E	0	0	0	1	0	1	0	0	1	0	0	1	0	0	0	1	0	0	1	0	0	1	0	1	0	0	1	0	0	0	1	1	0	1	0	0	0	0	0	0	1	1	0	1	0
Ask_Har_06	ASK_HAR	ASK	HAR	E	0	1	0	1	0	0	1	0	0	0	0	1	1	0	0	1	0	0	0	0	0	1	0	0	0	0	1	0	1	0	1	0	0	1	0	0	0	0	0	0	0	0	1	0	0
Ask_Har_07	ASK_HAR	ASK	HAR	H	1	0	0	0	0	0	0	0	0	0	0	1	0	0	0	0	0	0	0	0	0	1	0	1	0	0	1	1	0	1	1	1	0	1	0	0	1	0	0	1	0	0	0	1	1
Ask_Har_08	ASK_HAR	ASK	HAR	E	0	1	0	1	0	0	0	0	0	0	0	1	1	0	0	0	0	0	0	0	0	0	0	1	1	0	1	0	0	1	1	0	0	1	0	1	0	0	0	0	1	0	1	1	0
Ask_Har_09	ASK_HAR	ASK	HAR	E	0	0	0	0	0	1	1	0	0	0	0	0	0	0	0	1	0	0	1	0	0	0	0	1	0	0	0	0	0	1	0	0	0	0	0	0	0	1	0	0	0	0	0	0	0
Ask_Har_10	ASK_HAR	ASK	HAR	E	0	1	0	0	0	0	0	0	0	0	0	0	0	0	0	0	0	0	0	0	0	0	0	0	0	0	0	0	0	0	0	0	0	0	0	0	0	0	1	0	1	1	0	0	0
Ask_Har_11	ASK_HAR	ASK	HAR	E	0	1	0	1	0	1	1	0	0	1	0	1	0	0	0	1	1	0	1	0	1	1	0	1	0	0	1	1	0	0	1	0	0	1	1	0	0	1	0	0	0	1	1	0	0
Ask_Har_12	ASK_HAR	ASK	HAR	E	0	1	0	1	0	0	0	1	0	0	1	1	0	0	0	1	0	0	1	0	1	1	0	1	0	0	1	0	0	0	1	0	1	1	0	0	0	1	0	0	1	1	0	1	0
Ask_Har_13	ASK_HAR	ASK	HAR	E	0	0	0	0	0	0	0	0	0	0	0	1	0	0	0	1	0	0	0	0	0	1	0	1	0	1	1	0	0	0	1	1	0	1	0	0	0	0	0	1	0	0	0	0	0
Ask_Har_14	ASK_HAR	ASK	HAR	H	1	0	0	0	0	0	1	0	0	1	1	0	0	0	0	1	0	0	0	0	1	1	0	0	1	0	1	1	0	0	1	1	0	1	0	0	0	0	0	0	0	0	0	0	0
Ask_Har_15	ASK_HAR	ASK	HAR	H	1	0	0	0	0	0	0	1	0	0	0	1	0	0	0	1	0	0	0	0	0	0	0	1	0	0	1	0	0	0	1	1	0	1	0	0	0	1	0	1	0	0	1	1	0
Ask_Har_16	ASK_HAR	ASK	HAR	E	0	1	0	1	0	0	1	0	0	0	0	1	0	0	0	1	0	0	1	0	0	1	0	1	0	0	1	1	0	0	1	1	0	1	0	0	0	0	1	0	1	0	0	1	0
Ask_Har_17	ASK_HAR	ASK	HAR	H	1	0	0	0	0	0	0	1	1	0	0	1	0	0	0	1	0	0	0	0	0	1	0	1	0	0	1	0	0	0	1	1	0	1	1	0	0	1	0	1	1	0	0	0	0
Ask_Har_18	ASK_HAR	ASK	HAR	H	1	0	1	1	0	0	1	1	1	1	0	1	1	1	0	1	0	0	1	0	0	1	0	0	1	0	1	1	0	0	1	1	0	0	0	0	0	1	0	1	0	0	0	0	0
Ask_Har_19	ASK_HAR	ASK	HAR	E	0	0	1	1	0	0	0	1	0	1	0	1	0	0	0	0	0	0	1	0	0	0	0	1	0	0	1	1	1	0	1	1	0	1	1	0	0	1	0	1	0	0	1	0	0
Ask_Har_20	ASK_HAR	ASK	HAR	E	0	0	0	1	0	1	1	0	0	0	1	0	1	0	1	1	0	0	0	0	1	1	0	1	0	0	1	0	0	0	1	0	0	1	1	0	0	0	0	0	1	1	0	1	0
Ask_Har_21	ASK_HAR	ASK	HAR	H	1	1	0	1	0	0	0	0	0	0	0	1	0	0	0	0	0	0	0	0	0	0	0	1	0	0	1	0	0	0	0	1	0	1	0	0	0	0	0	0	1	0	0	1	0
Ask_Har_22	ASK_HAR	ASK	HAR	H	1	0	1	1	0	1	1	0	1	0	0	0	1	1	0	1	0	0	1	0	0	1	0	0	1	0	1	1	0	0	1	0	0	1	0	0	0	1	0	0	1	0	0	0	1
Ask_Har_23	ASK_HAR	ASK	HAR	H	1	0	1	1	0	0	1	0	0	0	0	0	0	1	0	0	0	0	0	0	0	0	0	1	0	0	1	0	0	0	1	1	0	1	0	0	1	0	1	1	0	0	0	0	0
Ask_Har_24	ASK_HAR	ASK	HAR	H	1	0	0	1	0	0	1	0	1	1	0	1	0	0	0	1	0	0	1	0	1	1	0	1	0	0	1	0	0	0	0	1	0	1	0	0	0	0	0	1	0	1	0	0	0
Ask_Har_25	ASK_HAR	ASK	HAR	T	2	1	1	0	0	1	1	1	1	0	0	0	0	1	0	1	1	1	0	0	1	1	1	1	1	0	1	0	1	0	1	1	0	1	0	1	0	0	0	0	1	1	1	0	0
Ask_Har_26	ASK_HAR	ASK	HAR	E	0	1	1	0	0	0	1	1	1	1	0	1	0	0	0	1	0	1	1	0	1	1	0	1	1	0	1	1	1	0	1	1	0	1	1	1	1	0	0	1	0	1	0	1	1
Ask_Har_27	ASK_HAR	ASK	HAR	T	2	0	0	1	0	1	0	0	0	0	0	1	0	0	0	1	0	0	0	0	0	1	0	0	0	0	1	0	0	1	0	0	0	1	0	1	1	0	0	1	0	0	0	0	1
Ask_Har_28	ASK_HAR	ASK	HAR	E	0	0	1	0	0	0	1	0	0	0	0	0	0	0	0	0	0	0	0	0	0	0	0	0	0	0	1	0	0	0	1	1	0	1	0	0	0	0	0	0	0	1	0	0	1
Ask_Har_29	ASK_HAR	ASK	HAR	H	1	0	0	0	0	0	0	0	0	0	0	0	0	0	0	1	1	0	0	0	0	0	0	0	0	0	1	0	0	0	1	1	0	1	0	1	0	0	0	0	1	1	1	0	0
Ask_Har_30	ASK_HAR	ASK	HAR	E	0	0	0	0	0	0	0	0	1	1	0	0	0	0	0	0	0	0	0	0	0	0	0	1	0	0	1	0	0	0	1	1	0	0	0	0	1	0	0	0	0	1	0	0	0
Ask_Ref_01	ASK_REF	ASK	REF	H	1	1	0	0	0	1	0	1	0	1	0	0	0	0	0	0	1	0	0	0	1	1	0	1	1	0	1	1	0	0	1	0	1	1	0	1	1	0	0	0	0	0	0	0	0
Ask_Ref_02	ASK_REF	ASK	REF	E	0	1	1	1	0	1	0	0	1	1	0	1	1	0	0	0	0	0	1	0	1	1	0	1	1	0	1	0	0	0	1	0	0	1	1	0	1	0	0	1	1	0	0	0	0
Ask_Ref_03	ASK_REF	ASK	REF	H	1	1	1	1	0	0	0	1	1	0	0	0	0	1	1	1	0	0	0	0	0	1	0	0	1	0	1	0	0	0	1	1	0	0	0	0	0	0	0	1	1	0	0	1	0
Ask_Ref_04	ASK_REF	ASK	REF	H	1	1	0	1	0	1	1	0	0	1	0	1	0	0	0	0	0	0	0	0	1	0	0	1	1	0	1	1	0	0	1	1	0	0	0	0	0	1	0	0	0	1	0	0	1
Ask_Ref_06	ASK_REF	ASK	REF	E	0	0	0	0	0	0	0	0	1	1	0	0	0	1	0	1	0	0	0	0	0	0	0	0	0	0	1	0	0	0	1	1	0	1	0	0	0	0	0	0	0	1	0	0	0
Ask_Ref_07	ASK_REF	ASK	REF	T	2	1	0	0	0	0	0	0	0	0	0	0	0	0	0	0	0	0	0	0	0	1	0	1	1	0	0	0	0	0	0	1	0	1	1	0	1	1	0	1	0	0	0	0	0
Ask_Ref_08	ASK_REF	ASK	REF	E	0	0	0	1	0	1	0	0	0	0	0	0	0	1	0	0	0	0	1	0	1	0	0	1	0	0	1	0	1	0	1	0	0	1	0	0	1	0	0	0	0	0	0	0	0
Ask_Ref_10	ASK_REF	ASK	REF	H	1	0	0	0	0	0	0	0	1	1	1	1	0	0	0	0	1	0	1	0	0	1	0	1	0	0	1	0	0	0	1	1	1	1	0	0	1	0	0	0	0	1	1	1	0
Ask_Ref_11	ASK_REF	ASK	REF	E	0	1	1	0	0	1	0	0	0	1	0	1	0	1	0	1	1	0	0	0	0	1	0	1	0	0	1	0	0	0	1	1	0	1	0	0	0	1	0	1	0	0	0	0	0
Ask_Ref_12	ASK_REF	ASK	REF	T	2	0	0	0	0	0	0	0	0	1	1	0	1	0	0	0	0	0	0	0	0	0	1	1	0	0	1	0	0	0	1	1	0	1	0	0	0	0	0	0	0	1	0	0	0
Ask_Ref_13	ASK_REF	ASK	REF	E	0	1	0	0	0	0	0	0	0	0	0	1	0	0	0	0	1	0	0	0	0	0	0	1	0	0	1	0	0	0	1	1	0	0	0	1	0	0	0	0	1	0	0	0	0
Ask_Ref_14	ASK_REF	ASK	REF	T	2	0	0	1	1	0	0	0	1	0	0	1	0	0	0	1	1	0	0	0	0	1	0	1	0	0	1	0	0	0	1	1	0	1	0	0	0	0	0	0	1	1	0	0	0
Ask_Ref_16	ASK_REF	ASK	REF	H	1	0	0	0	0	0	0	0	0	0	0	1	0	0	0	1	1	0	0	0	1	1	0	1	0	0	1	1	0	0	0	1	1	1	0	0	0	0	0	0	1	0	0	1	0
Ask_Ref_17	ASK_REF	ASK	REF	H	1	0	0	1	0	0	0	0	0	0	0	0	0	0	0	1	1	0	0	0	0	1	0	1	0	0	1	0	0	0	1	1	0	1	0	0	1	0	0	1	1	1	0	1	0
Ask_Ref_18	ASK_REF	ASK	REF	H	1	1	0	1	0	0	1	0	1	0	0	0	0	0	0	1	0	1	0	0	0	1	0	0	1	0	1	0	0	0	0	0	0	1	0	0	0	0	0	0	1	0	0	0	0
Ask_Ref_19	ASK_REF	ASK	REF	T	2	1	0	1	0	0	0	0	0	1	0	0	0	0	0	1	0	1	1	0	1	1	1	0	0	0	1	1	0	0	1	1	1	1	0	0	0	1	0	1	0	1	0	1	0
Ask_Ref_22	ASK_REF	ASK	REF	H	1	0	1	1	0	1	1	1	0	0	0	0	0	0	0	1	0	0	0	0	0	1	0	1	0	0	1	1	0	0	1	1	0	1	0	0	0	0	0	1	0	1	1	1	1
Ask_Ref_23	ASK_REF	ASK	REF	H	1	0	0	1	0	0	0	1	0	0	0	1	0	0	0	0	0	0	0	0	0	0	0	0	1	0	1	0	0	0	1	0	0	1	0	0	0	0	0	0	1	0	0	0	0
Ask_Ref_24	ASK_REF	ASK	REF	H	1	0	0	0	0	0	0	0	0	0	0	1	0	1	0	1	0	0	0	0	0	1	0	0	0	0	1	0	0	0	1	1	0	1	0	0	0	0	0	1	0	1	0	1	0
Ask_Ref_25	ASK_REF	ASK	REF	T	2	0	0	0	0	0	0	0	1	0	0	1	0	0	0	1	0	0	0	0	0	0	0	0	0	0	1	0	0	0	1	1	0	1	0	0	0	0	0	0	0	1	0	1	0
Ask_Ref_26	ASK_REF	ASK	REF	H	1	1	0	1	0	0	1	1	0	0	0	1	0	0	0	1	0	0	0	1	1	1	0	1	0	0	1	0	0	0	1	1	0	1	0	0	0	0	0	0	1	0	0	0	0
Ask_Ref_27	ASK_REF	ASK	REF	H	1	1	1	1	0	1	0	0	1	0	0	1	0	0	0	1	0	0	0	0	0	1	0	0	0	0	1	0	0	1	1	1	0	0	0	0	0	0	0	0	0	0	0	0	0
Ask_Ref_28	ASK_REF	ASK	REF	H	1	1	0	1	0	1	1	0	1	0	0	1	0	0	0	1	1	0	0	0	1	0	0	1	0	0	1	0	0	0	1	1	0	1	0	0	0	0	0	0	1	1	1	0	0
Ask_Ref_29	ASK_REF	ASK	REF	E	0	1	0	1	0	1	1	0	0	0	0	1	0	0	1	1	0	0	0	0	1	1	0	1	1	0	1	0	0	0	1	0	0	1	0	0	0	0	0	0	1	0	0	1	0
Ask_Ref_30	ASK_REF	ASK	REF	H	1	1	0	0	0	0	0	0	0	0	0	0	0	1	1	0	0	0	0	0	0	0	0	1	0	0	1	0	0	0	1	1	0	0	0	0	0	0	0	1	0	1	0	0	1
Ask_STP_01	ASK_STP	ASK	STP	H	1	1	1	1	0	0	1	1	0	1	0	1	0	0	1	0	0	1	0	0	0	1	0	0	1	1	1	0	0	1	1	1	0	1	0	0	0	1	1	1	0	1	0	1	1
Ask_STP_02	ASK_STP	ASK	STP	E	0	1	0	0	1	0	0	0	0	0	0	0	0	0	0	1	0	0	0	0	0	1	0	1	1	0	1	0	0	0	0	0	0	0	0	0	0	0	0	0	0	0	1	0	0
Ask_STP_03	ASK_STP	ASK	STP	E	0	0	0	0	0	1	0	1	0	0	0	0	0	1	0	1	0	0	0	0	0	1	0	1	0	0	1	0	0	0	1	0	0	1	1	0	0	0	0	0	0	1	0	1	0
Ask_STP_05	ASK_STP	ASK	STP	E	0	1	0	0	0	0	1	0	0	0	0	1	0	0	0	0	0	0	0	0	1	1	0	0	0	0	0	0	0	0	1	0	0	1	1	0	0	0	0	0	0	0	0	0	0
Ask_STP_06	ASK_STP	ASK	STP	T	2	1	0	0	1	1	0	0	0	1	1	1	0	1	0	1	1	1	0	0	1	0	0	1	1	0	1	0	0	0	1	0	1	1	0	0	1	0	0	1	0	0	0	0	1
Ask_STP_07	ASK_STP	ASK	STP	H	1	0	1	1	0	1	0	0	1	1	0	1	0	0	0	1	0	0	1	0	0	0	0	0	0	0	1	0	0	0	1	1	0	1	1	0	0	0	0	1	1	1	0	1	0
Ask_STP_09	ASK_STP	ASK	STP	T	2	1	0	1	0	0	0	0	0	0	0	1	0	0	0	1	0	0	0	0	0	0	0	1	0	0	1	0	0	0	1	0	0	1	0	0	0	1	0	1	0	0	1	1	0
Ask_STP_10	ASK_STP	ASK	STP	T	2	1	0	1	0	1	0	1	0	1	0	1	0	0	0	1	0	0	0	0	0	1	0	1	0	0	1	1	0	0	1	0	1	1	0	0	0	0	0	0	1	1	0	0	0
Ask_STP_11	ASK_STP	ASK	STP	E	0	1	0	1	0	1	0	0	1	0	1	1	0	0	0	0	1	0	1	0	0	1	1	1	1	1	1	1	0	1	1	1	0	1	0	1	0	0	0	0	0	1	0	1	0
Ask_STP_12	ASK_STP	ASK	STP	H	1	1	0	1	0	0	1	1	1	0	1	1	1	1	0	0	1	0	0	0	1	1	1	0	1	0	1	1	0	0	1	1	0	1	0	1	0	1	0	1	1	1	0	1	1
Ask_STP_13	ASK_STP	ASK	STP	E	0	0	1	1	0	1	0	0	0	0	1	1	0	1	0	1	0	0	1	0	1	1	0	1	0	0	1	0	0	1	1	1	1	0	0	0	1	0	0	0	1	1	0	0	0
Ask_STP_14	ASK_STP	ASK	STP	H	1	1	0	1	0	1	1	0	0	1	0	1	0	1	0	1	0	0	0	0	0	1	0	0	1	0	1	0	1	0	1	1	1	1	1	0	1	0	0	0	1	1	1	1	0
Ask_STP_15	ASK_STP	ASK	STP	H	1	1	0	1	0	0	0	0	0	0	0	1	0	0	0	0	0	0	0	0	0	1	1	0	0	0	1	0	0	0	1	0	0	1	0	0	1	0	1	0	1	1	0	0	0
Ask_STP_16	ASK_STP	ASK	STP	E	0	1	0	1	0	0	1	0	0	0	0	1	0	0	0	0	0	0	1	0	1	0	0	0	1	0	1	0	0	0	1	1	0	1	1	0	0	0	0	0	0	0	0	0	0
Ask_STP_17	ASK_STP	ASK	STP	E	0	0	0	0	0	0	0	0	0	0	1	1	0	0	0	1	0	0	0	0	0	0	0	1	0	0	1	0	1	0	1	1	0	1	0	0	0	0	0	1	0	1	0	1	0
Ask_STP_18	ASK_STP	ASK	STP	T	2	0	0	0	0	0	0	0	0	0	0	1	0	0	0	1	0	0	1	0	0	1	1	1	0	0	1	0	0	0	1	1	0	1	0	0	0	0	0	0	1	1	0	0	0
Ask_STP_19	ASK_STP	ASK	STP	T	2	1	1	1	0	1	0	0	1	0	0	1	0	0	0	1	0	0	0	0	1	1	0	1	0	0	1	0	0	0	1	1	0	1	0	0	0	0	0	0	1	1	0	0	1
Ask_STP_21	ASK_STP	ASK	STP	H	1	0	0	0	0	0	0	0	1	0	0	1	0	0	0	0	0	0	0	0	0	0	0	0	0	0	1	1	0	0	1	1	0	1	0	0	0	0	0	0	1	0	1	0	1
Ask_STP_23	ASK_STP	ASK	STP	NA	NA	1	1	1	0	1	0	0	0	0	1	1	0	0	0	1	0	0	0	0	0	1	1	1	1	0	1	0	0	0	0	0	1	1	0	0	0	0	0	1	0	1	1	1	0
Ask_STP_24	ASK_STP	ASK	STP	H	1	1	0	0	1	0	0	0	0	0	1	1	0	1	0	1	0	0	0	0	0	1	0	1	1	0	1	0	0	0	1	1	0	1	0	0	0	0	0	0	1	0	1	1	0
Ask_STP_25	ASK_STP	ASK	STP	T	2	1	0	1	0	1	1	0	1	1	0	1	0	1	0	1	0	0	1	0	0	1	0	1	1	0	1	0	1	0	1	1	1	1	0	0	0	1	0	0	1	1	0	0	0
Ask_STP_26	ASK_STP	ASK	STP	T	2	1	1	1	0	0	0	1	0	1	0	0	0	0	0	1	0	0	0	0	0	1	0	1	1	0	1	0	0	0	1	0	0	0	0	0	0	0	0	0	0	0	0	0	0
Ask_STP_27	ASK_STP	ASK	STP	T	2	0	1	0	0	0	1	1	1	0	0	1	1	0	0	0	0	1	1	0	1	1	1	0	1	1	1	0	0	0	1	0	1	1	0	0	1	0	0	0	0	1	0	1	1
Ask_STP_28	ASK_STP	ASK	STP	H	1	0	0	1	0	0	0	0	0	1	0	0	0	0	0	0	0	0	0	0	1	1	0	1	1	0	1	0	1	0	1	1	0	0	0	0	1	1	0	0	0	0	0	0	0
Ask_STP_30	ASK_STP	ASK	STP	T	2	0	0	1	0	1	0	0	0	0	0	0	0	0	0	1	0	0	0	0	0	0	0	0	0	0	1	0	0	0	1	1	0	1	0	0	0	0	0	1	0	0	0	0	1
TVA_Har_01	TVA_HAR	TVA	HAR	H	1	1	0	0	0	0	1	1	0	1	0	0	0	0	0	1	0	0	1	0	0	1	0	0	0	0	1	0	0	0	1	0	1	1	0	0	0	0	0	0	0	1	1	1	0
TVA_Har_04	TVA_HAR	TVA	HAR	E	0	1	1	0	1	0	1	1	0	0	0	0	0	0	1	0	0	0	1	0	1	1	1	0	1	0	1	0	1	0	0	0	1	1	1	0	0	0	0	0	0	1	0	1	0
TVA_Har_06	TVA_HAR	TVA	HAR	H	1	0	0	1	0	0	1	0	1	0	0	1	0	0	0	1	0	0	0	0	0	0	0	1	0	0	1	0	0	0	1	1	1	0	0	0	0	0	0	0	1	1	1	0	0
TVA_Har_07	TVA_HAR	TVA	HAR	T	2	1	0	1	1	1	1	0	1	1	0	0	0	0	0	1	0	0	0	1	0	1	0	0	1	1	1	1	0	0	1	1	0	1	0	0	0	1	0	1	0	1	1	0	1
TVA_Har_08	TVA_HAR	TVA	HAR	NA	NA	0	0	1	0	1	1	0	1	1	0	1	0	0	0	0	1	0	0	0	0	0	0	0	0	0	1	0	0	0	1	1	0	1	0	0	0	0	0	1	0	0	0	1	0
TVA_Har_09	TVA_HAR	TVA	HAR	H	1	0	0	1	0	0	0	0	0	1	0	1	0	0	0	1	0	0	0	0	0	1	0	0	0	0	1	0	0	0	1	0	0	1	0	0	0	0	0	0	0	1	0	1	0
TVA_Har_10	TVA_HAR	TVA	HAR	E	0	1	0	1	0	1	1	1	0	0	0	1	0	0	0	1	0	1	0	1	1	0	0	0	1	0	1	0	0	0	1	0	1	1	0	0	0	1	0	1	1	1	0	1	0
TVA_Har_11	TVA_HAR	TVA	HAR	H	1	1	0	0	0	0	0	0	1	1	0	1	0	0	0	0	0	0	1	0	0	1	0	0	0	0	1	1	1	0	1	0	1	1	0	0	0	0	0	1	0	1	0	1	0
TVA_Har_12	TVA_HAR	TVA	HAR	H	1	0	0	0	0	0	0	0	1	1	0	1	0	0	0	0	0	0	0	0	0	0	0	1	0	0	1	0	0	0	1	1	0	1	0	0	0	0	0	0	1	1	0	0	0
TVA_Har_13	TVA_HAR	TVA	HAR	E	0	0	0	1	0	1	0	1	0	0	1	0	0	0	0	1	0	0	1	0	0	0	0	0	1	0	1	0	0	0	1	1	0	1	0	0	1	0	0	1	1	0	0	0	0
TVA_Har_14	TVA_HAR	TVA	HAR	E	0	0	0	0	0	1	0	0	1	0	0	1	0	0	0	1	0	0	1	0	0	0	0	1	0	0	1	0	0	0	1	1	0	0	0	0	0	0	0	0	1	1	0	0	0
TVA_Har_15	TVA_HAR	TVA	HAR	E	0	1	1	1	0	0	1	1	1	1	0	1	0	0	0	0	1	1	0	0	0	0	0	1	1	0	1	0	0	0	1	1	0	1	1	0	1	0	0	1	0	1	0	0	0
TVA_Har_16	TVA_HAR	TVA	HAR	H	1	0	1	1	0	1	0	0	0	1	1	1	0	1	0	1	0	0	1	0	0	1	0	0	1	0	1	0	1	0	1	1	0	1	0	0	0	0	0	0	0	0	0	0	0
TVA_Har_17	TVA_HAR	TVA	HAR	H	1	1	0	0	0	1	0	0	0	0	0	1	0	0	0	1	0	0	0	0	1	0	0	1	0	0	1	0	0	0	1	1	0	1	0	0	0	0	0	1	0	1	0	0	0
TVA_Har_18	TVA_HAR	TVA	HAR	H	1	0	0	1	0	0	0	0	0	0	0	1	0	0	0	1	0	0	0	0	0	1	0	0	0	0	1	0	0	0	1	1	0	1	0	0	0	0	0	0	0	1	0	1	0
TVA_Har_19	TVA_HAR	TVA	HAR	E	0	1	0	1	0	1	0	0	0	0	1	1	0	0	0	1	0	0	0	0	0	0	0	1	1	0	1	0	0	0	1	1	0	0	1	0	0	0	0	1	0	0	1	0	0
TVA_Har_20	TVA_HAR	TVA	HAR	H	1	1	1	1	0	1	0	1	0	1	0	1	0	0	0	1	1	0	0	1	0	1	0	0	1	1	1	0	1	0	1	1	0	1	1	1	0	1	0	1	0	0	0	0	0
TVA_Har_21	TVA_HAR	TVA	HAR	H	1	1	1	1	0	0	0	0	0	1	0	1	0	0	0	0	0	0	0	0	0	0	0	1	0	0	1	0	0	0	1	0	1	1	1	0	0	1	0	0	0	0	1	1	0
TVA_Har_22	TVA_HAR	TVA	HAR	H	1	1	1	0	0	0	1	1	0	0	0	0	0	1	0	1	0	1	0	0	0	0	1	0	0	0	1	0	0	0	1	1	0	1	0	0	0	0	0	1	0	1	1	0	0
TVA_Har_23	TVA_HAR	TVA	HAR	E	0	0	1	1	0	0	0	0	1	0	0	0	0	0	0	0	0	0	0	0	0	0	0	1	0	0	1	0	0	0	0	1	0	1	0	0	0	0	0	0	0	0	0	0	0
TVA_Har_25	TVA_HAR	TVA	HAR	E	0	0	1	1	0	0	1	1	0	0	0	1	0	0	0	1	0	0	0	0	0	0	0	1	1	0	1	0	0	0	1	1	0	1	0	0	0	1	0	1	1	1	1	1	0
TVA_Har_27	TVA_HAR	TVA	HAR	E	0	1	0	0	0	0	0	0	1	0	1	1	0	0	0	0	0	0	1	0	0	0	0	1	0	0	1	0	0	0	0	1	0	0	0	0	0	0	0	0	1	0	0	1	0
TVA_Har_28	TVA_HAR	TVA	HAR	H	1	1	0	1	0	0	0	0	1	0	0	1	0	0	0	1	1	0	0	0	0	1	0	0	0	1	1	0	0	0	1	1	0	1	1	0	0	0	0	1	1	1	1	1	0
TVA_Har_29	TVA_HAR	TVA	HAR	H	1	1	0	1	0	0	1	0	0	0	1	0	0	0	0	1	0	0	0	0	0	0	1	1	0	0	1	0	0	0	1	1	0	0	0	0	0	1	0	0	0	0	0	0	0
TVA_Har_30	TVA_HAR	TVA	HAR	H	1	1	0	0	0	0	0	1	0	0	0	1	0	0	0	1	1	0	1	0	0	0	0	1	0	0	1	0	0	0	1	1	0	1	0	0	0	0	0	0	0	1	1	0	0
TVA_Ref_01	TVA_REF	TVA	REF	T	2	0	0	1	1	0	0	0	0	1	0	1	0	0	0	1	1	0	0	0	0	1	0	0	1	0	1	0	0	0	1	1	0	1	0	0	0	1	0	0	1	1	0	0	0
TVA_Ref_02	TVA_REF	TVA	REF	E	0	0	1	1	0	0	0	0	0	0	0	1	0	0	0	1	0	0	0	0	0	1	0	1	0	0	1	0	0	0	1	0	0	0	0	0	0	0	0	1	0	0	0	1	0
TVA_Ref_03	TVA_REF	TVA	REF	E	0	0	0	1	0	0	0	0	1	1	0	1	0	0	0	0	1	0	1	0	0	0	0	0	0	0	1	0	0	0	1	0	0	1	0	0	1	0	0	0	1	0	0	0	0
TVA_Ref_04	TVA_REF	TVA	REF	H	1	0	0	0	0	0	0	0	1	0	0	0	0	0	0	1	1	0	0	0	0	1	0	1	0	0	1	0	0	0	1	1	0	0	0	0	1	0	0	0	0	0	0	0	0
TVA_Ref_05	TVA_REF	TVA	REF	E	0	0	0	1	0	1	0	1	0	1	0	1	0	0	0	1	0	0	0	0	0	0	0	0	1	0	1	0	0	0	1	1	0	1	0	0	0	0	0	0	1	0	0	0	0
TVA_Ref_06	TVA_REF	TVA	REF	H	1	0	0	1	0	0	1	1	0	0	0	0	0	0	0	0	0	0	0	0	0	0	0	1	0	0	1	0	1	0	1	0	0	1	0	0	0	0	0	0	0	0	0	1	0
TVA_Ref_07	TVA_REF	TVA	REF	T	2	0	0	0	0	1	1	0	0	0	1	1	0	0	0	1	0	1	0	0	0	0	0	1	0	0	1	0	0	0	1	1	0	1	0	0	1	0	0	0	0	0	1	0	0
TVA_Ref_08	TVA_REF	TVA	REF	E	0	1	0	1	0	1	0	0	0	0	0	1	0	0	0	0	0	0	0	1	0	0	0	1	0	0	1	1	0	0	1	1	0	0	0	0	0	0	0	0	0	0	0	1	0
TVA_Ref_09	TVA_REF	TVA	REF	NA	NA	1	1	1	0	0	0	0	0	1	0	0	0	0	0	1	0	0	0	0	0	0	0	1	0	0	1	0	0	0	1	0	0	1	0	0	0	0	0	0	0	0	0	0	0
TVA_Ref_10	TVA_REF	TVA	REF	H	1	0	0	0	0	0	1	0	0	0	0	0	0	0	0	1	0	0	0	0	0	1	0	1	0	0	1	1	0	0	1	1	0	1	0	0	0	0	0	0	1	1	0	0	0
TVA_Ref_11	TVA_REF	TVA	REF	E	0	0	1	0	0	0	0	0	1	0	0	1	0	0	0	0	0	0	1	0	0	1	0	1	0	0	1	0	0	0	1	1	0	1	0	0	0	0	0	0	0	1	0	0	0
TVA_Ref_12	TVA_REF	TVA	REF	H	1	0	0	0	0	1	0	1	0	0	0	1	0	0	0	1	0	0	0	0	0	1	0	0	1	0	1	0	1	0	0	1	0	1	1	0	1	1	0	0	0	0	0	0	0
TVA_Ref_13	TVA_REF	TVA	REF	E	0	1	0	1	0	1	0	1	1	0	0	1	1	1	0	1	0	0	0	1	0	1	0	0	1	1	1	0	0	0	1	1	0	1	0	0	0	0	0	0	1	1	0	1	0
TVA_Ref_14	TVA_REF	TVA	REF	H	1	1	1	1	0	0	1	0	0	0	0	1	0	1	0	0	1	1	0	0	0	1	0	0	1	0	1	1	0	0	1	1	0	1	0	0	1	1	0	1	1	1	0	1	0
TVA_Ref_15	TVA_REF	TVA	REF	H	1	1	0	0	0	0	0	0	0	0	0	0	1	0	1	1	1	0	0	0	0	0	0	1	0	0	1	0	1	0	1	0	1	1	0	0	1	0	1	0	0	1	0	0	0
TVA_Ref_16	TVA_REF	TVA	REF	E	0	1	0	1	0	0	0	0	1	1	0	1	0	0	0	0	0	0	0	0	0	1	0	1	0	0	1	1	0	0	1	1	0	1	0	0	0	0	0	1	0	1	1	0	0
TVA_Ref_17	TVA_REF	TVA	REF	T	2	1	0	1	0	1	0	0	0	0	1	0	0	0	0	1	0	0	0	1	0	1	0	1	1	0	1	0	0	0	1	1	0	0	0	0	0	0	0	0	1	1	0	0	0
TVA_Ref_18	TVA_REF	TVA	REF	H	1	1	1	1	0	0	0	1	1	1	0	0	0	0	0	1	0	0	0	0	0	0	1	1	0	0	1	0	1	0	1	1	0	0	0	0	0	0	0	0	1	1	0	1	1
TVA_Ref_20	TVA_REF	TVA	REF	H	1	0	0	1	1	1	0	0	0	0	0	0	0	1	0	1	0	0	0	0	1	1	0	0	0	0	1	0	0	0	0	1	0	0	0	0	0	0	0	0	0	0	0	0	0
TVA_Ref_21	TVA_REF	TVA	REF	T	2	0	0	0	0	1	0	1	0	0	0	1	0	0	0	1	1	0	1	0	0	1	0	1	0	0	1	0	0	0	1	1	0	1	0	0	1	1	0	1	0	0	1	1	0
TVA_Ref_22	TVA_REF	TVA	REF	H	1	1	0	1	0	0	0	0	0	0	0	0	0	0	0	0	0	0	0	0	0	0	0	0	0	0	1	0	0	0	1	1	0	0	0	0	0	0	0	0	1	1	0	0	1
TVA_Ref_23	TVA_REF	TVA	REF	T	2	0	1	1	0	0	1	0	0	0	0	1	0	1	0	1	1	0	0	0	0	1	1	1	0	0	1	0	0	0	1	1	0	1	0	0	0	0	0	0	1	1	0	1	0
TVA_Ref_24	TVA_REF	TVA	REF	T	2	0	0	0	0	0	0	0	1	0	0	1	0	0	1	1	0	0	0	0	0	0	0	1	0	0	1	1	0	0	1	1	0	1	0	0	0	0	0	0	0	1	1	0	0
TVA_Ref_25	TVA_REF	TVA	REF	H	1	0	0	1	0	0	0	0	1	0	0	1	0	0	0	1	1	0	0	0	0	0	1	1	0	0	1	0	0	1	1	1	0	1	0	0	0	0	0	1	1	0	1	0	0
TVA_Ref_26	TVA_REF	TVA	REF	H	1	0	0	1	0	0	0	0	0	0	0	1	0	0	0	1	1	0	0	1	1	1	0	1	0	0	1	0	0	0	1	1	0	1	1	0	1	1	0	1	1	1	0	0	0
TVA_Ref_29	TVA_REF	TVA	REF	H	1	1	0	0	0	0	0	0	0	1	1	1	0	0	0	0	0	0	0	0	0	1	0	0	0	0	1	1	0	0	1	1	1	1	0	0	1	1	0	1	1	0	1	0	0
TVA_Ref_30	TVA_REF	TVA	REF	E	0	0	0	0	0	0	0	0	0	0	0	1	1	0	0	1	0	0	0	0	0	1	0	0	1	0	1	0	1	0	1	1	0	1	0	0	0	1	0	0	0	1	0	0	1
TVA_STP_01	TVA_STP	TVA	STP	H	1	0	1	1	0	1	0	1	1	0	0	1	1	0	0	1	0	0	1	1	0	1	0	0	0	0	1	0	0	0	1	0	0	1	1	0	0	0	0	1	0	1	0	0	0
TVA_STP_02	TVA_STP	TVA	STP	H	1	1	0	0	0	1	1	1	0	0	0	1	0	0	0	0	0	0	0	1	0	1	0	1	1	0	1	0	0	0	0	1	0	0	1	0	0	0	0	0	0	0	0	1	0
TVA_STP_03	TVA_STP	TVA	STP	E	0	0	0	0	0	0	0	1	1	0	1	0	0	0	0	1	1	0	0	0	1	0	0	0	1	0	1	0	0	0	1	0	0	1	1	0	0	0	0	0	0	0	0	1	0
TVA_STP_04	TVA_STP	TVA	STP	T	2	0	0	0	0	1	0	0	0	0	0	1	0	0	1	1	0	0	0	0	0	0	0	1	0	0	1	0	0	0	1	0	1	1	0	0	0	1	0	1	0	0	0	0	1
TVA_STP_05	TVA_STP	TVA	STP	E	0	1	0	1	1	1	0	1	1	1	0	0	1	0	0	1	0	1	0	1	0	1	0	0	1	0	1	1	0	0	1	1	1	1	1	0	0	1	0	1	0	1	0	1	0
TVA_STP_06	TVA_STP	TVA	STP	H	1	0	0	0	0	0	0	0	1	0	0	0	0	0	0	0	1	0	0	0	1	1	0	1	1	1	1	1	1	0	0	0	0	0	0	0	1	1	0	0	1	1	0	0	0
TVA_STP_10	TVA_STP	TVA	STP	E	0	0	0	0	1	1	1	1	0	0	0	0	0	0	0	1	0	1	0	0	0	1	0	1	0	0	1	0	0	0	1	0	1	1	0	0	0	0	1	0	0	1	0	0	0
TVA_STP_12	TVA_STP	TVA	STP	H	1	0	0	1	0	1	0	0	0	0	0	1	0	0	0	0	0	0	0	0	1	0	0	1	0	0	1	0	0	0	1	1	1	1	0	0	0	1	0	0	0	1	0	1	0
TVA_STP_13	TVA_STP	TVA	STP	H	1	1	0	1	0	0	0	1	0	0	0	1	0	0	0	1	0	0	0	0	1	0	0	0	1	0	1	0	0	0	1	1	0	1	1	0	0	1	0	0	1	1	1	0	0
TVA_STP_14	TVA_STP	TVA	STP	H	1	0	0	1	0	0	0	0	0	1	0	1	0	0	0	1	0	0	0	0	1	1	0	1	0	0	1	0	0	0	1	1	0	1	0	0	1	0	0	0	1	1	0	1	0
TVA_STP_15	TVA_STP	TVA	STP	H	1	1	0	1	0	1	0	0	1	1	0	1	1	0	0	1	0	0	0	1	0	1	0	1	1	0	1	1	1	0	1	1	0	1	0	0	0	0	0	1	1	1	0	1	0
TVA_STP_16	TVA_STP	TVA	STP	H	1	0	0	0	0	1	0	0	1	0	0	1	0	0	1	1	0	0	0	0	0	1	0	1	0	0	1	0	0	0	1	1	0	1	0	0	0	0	0	1	1	1	0	0	0
TVA_STP_17	TVA_STP	TVA	STP	E	0	0	1	1	0	1	0	1	0	0	0	1	0	0	0	0	0	0	0	0	0	1	0	1	1	0	1	0	1	0	1	0	0	1	1	0	0	0	0	0	1	1	0	0	0
TVA_STP_19	TVA_STP	TVA	STP	E	0	0	1	1	0	0	0	0	1	0	0	1	1	0	0	0	0	1	1	0	1	0	0	1	0	0	1	1	0	0	1	1	0	1	0	0	1	0	0	1	1	1	0	0	0
TVA_STP_20	TVA_STP	TVA	STP	T	2	0	1	1	0	0	0	1	0	1	0	1	0	1	0	1	1	0	0	0	0	1	0	1	0	1	1	1	1	0	1	0	0	1	0	0	1	0	0	0	0	0	0	0	0
TVA_STP_21	TVA_STP	TVA	STP	H	1	1	0	1	0	0	1	0	1	1	0	1	0	0	0	1	1	0	0	0	1	1	1	0	1	0	1	0	0	0	1	1	0	1	1	0	1	0	0	0	0	1	0	1	1
TVA_STP_22	TVA_STP	TVA	STP	E	0	0	0	0	0	1	1	0	0	1	0	1	0	0	0	1	0	0	0	0	0	1	0	0	1	0	1	0	0	0	1	0	0	0	0	0	0	0	0	0	0	0	0	0	0
TVA_STP_23	TVA_STP	TVA	STP	H	1	1	1	1	0	1	0	1	1	1	0	1	0	0	0	1	0	0	0	1	0	1	0	0	1	0	1	1	0	1	1	1	0	1	0	0	0	0	0	1	1	1	0	0	0
TVA_STP_24	TVA_STP	TVA	STP	H	1	0	0	0	0	1	1	0	0	0	1	0	0	0	0	1	0	0	0	0	0	0	0	1	0	0	1	0	0	0	1	0	0	0	0	0	0	0	0	0	0	1	0	0	0
TVA_STP_25	TVA_STP	TVA	STP	E	0	1	0	0	0	0	0	0	0	0	0	0	0	0	0	0	0	0	0	0	0	0	0	0	0	0	1	0	0	0	0	0	0	0	0	0	0	0	0	0	0	1	0	0	1
TVA_STP_27	TVA_STP	TVA	STP	H	1	1	1	1	0	1	0	0	1	0	0	1	0	0	0	1	0	1	0	0	0	1	0	0	1	0	1	0	0	0	1	1	0	1	1	0	1	0	0	1	0	1	1	1	0
TVA_STP_28	TVA_STP	TVA	STP	H	1	1	0	0	0	1	0	0	1	0	0	1	0	0	0	0	1	0	0	0	0	0	0	1	1	0	1	0	0	0	1	1	0	1	1	0	1	0	0	0	1	1	1	1	0
TVA_STP_29	TVA_STP	TVA	STP	H	1	1	0	1	0	0	0	0	0	0	0	1	0	0	1	1	0	0	0	0	0	1	0	1	0	0	1	0	0	0	1	1	0	1	0	0	0	1	0	1	1	1	1	0	0
TVA_STP_30	TVA_STP	TVA	STP	E	0	0	0	0	0	0	0	0	0	0	0	0	0	0	0	1	0	0	0	0	0	0	0	1	0	0	1	0	0	0	1	1	1	1	0	1	0	1	1	0	1	1	0	1	0
Kar_Har_02	KAR_HAR	KAR	HAR	E	0	0	0	1	0	0	0	0	0	0	0	0	0	0	0	1	0	0	0	0	0	0	0	1	0	0	1	0	0	0	1	1	0	1	0	0	0	0	0	1	0	1	0	0	0
Kar_Har_03	KAR_HAR	KAR	HAR	NA	NA	0	0	0	0	0	1	1	1	1	0	0	0	0	0	1	0	0	0	0	0	0	0	0	0	0	1	0	0	0	1	1	0	0	0	0	0	0	1	0	1	1	0	0	1
Kar_Har_04	KAR_HAR	KAR	HAR	E	0	1	0	1	0	0	1	1	0	0	1	1	0	0	0	1	0	0	0	0	0	1	0	1	1	0	1	0	0	1	1	0	1	1	0	0	0	0	0	0	1	1	0	0	0
Kar_Har_10	KAR_HAR	KAR	HAR	E	0	1	0	0	0	0	0	0	0	0	0	0	0	0	0	0	0	0	0	0	0	0	0	1	0	0	1	0	0	0	0	0	0	1	0	0	0	0	0	0	0	0	1	0	0
Kar_Har_11	KAR_HAR	KAR	HAR	H	1	1	1	1	0	0	1	1	0	0	0	0	1	0	0	0	0	0	0	0	0	1	0	0	1	0	1	0	0	0	1	0	0	1	0	0	0	0	0	0	0	0	0	0	0
Kar_Har_12	KAR_HAR	KAR	HAR	T	2	1	1	1	0	0	1	0	0	0	1	0	0	1	0	1	0	0	0	0	1	1	0	1	1	0	1	0	1	0	1	1	0	1	0	0	1	0	0	0	0	0	0	1	0
Kar_Har_13	KAR_HAR	KAR	HAR	E	0	0	0	0	0	0	1	0	0	0	0	0	0	0	0	1	0	0	0	0	1	1	0	0	1	0	1	0	0	0	0	0	0	1	0	0	1	0	0	0	0	0	0	0	0
Kar_Har_14	KAR_HAR	KAR	HAR	H	1	1	1	1	0	0	1	0	1	0	1	1	1	0	1	0	0	1	0	0	0	0	0	0	1	0	1	0	1	0	1	0	0	0	1	0	1	0	0	0	0	1	0	0	0
Kar_Har_15	KAR_HAR	KAR	HAR	H	1	0	0	1	0	0	1	0	1	0	0	0	1	0	0	1	0	0	0	0	0	0	0	1	1	0	1	0	0	0	0	0	0	1	0	0	1	0	0	0	0	0	0	0	0
Kar_Har_16	KAR_HAR	KAR	HAR	E	0	1	0	0	0	0	0	0	1	1	0	1	0	0	0	1	0	0	1	0	0	1	0	0	1	0	1	1	0	0	1	1	0	1	0	0	0	0	0	1	1	1	1	0	0
Kar_Har_17	KAR_HAR	KAR	HAR	H	1	1	1	1	0	0	1	1	0	1	0	0	0	0	0	0	0	0	0	0	0	0	0	1	1	1	1	0	0	0	1	0	0	1	0	1	0	0	0	0	1	1	0	0	0
Kar_Har_18	KAR_HAR	KAR	HAR	E	0	0	1	1	0	1	0	1	1	0	0	1	0	1	0	1	0	1	0	0	1	0	0	0	1	1	1	1	1	0	1	1	1	1	1	0	1	0	0	1	0	1	1	0	1
Kar_Har_19	KAR_HAR	KAR	HAR	E	0	0	1	1	0	0	0	1	1	1	1	1	0	0	0	1	0	1	0	1	0	0	0	1	1	0	1	0	0	0	0	0	0	1	0	1	1	0	0	0	0	1	0	0	0
Kar_Har_20	KAR_HAR	KAR	HAR	H	1	0	1	1	0	1	0	0	1	0	1	1	0	0	1	1	1	0	1	0	1	1	0	1	1	0	1	0	0	0	1	1	0	1	0	0	1	1	0	0	1	1	0	0	0
Kar_Har_21	KAR_HAR	KAR	HAR	H	1	1	0	0	1	1	0	1	0	1	0	1	0	0	0	1	0	1	0	0	0	1	0	1	0	0	1	0	0	0	1	1	1	1	0	0	0	1	0	0	1	1	0	0	0
Kar_Har_22	KAR_HAR	KAR	HAR	T	2	1	0	1	0	0	1	0	0	1	0	1	0	0	0	1	1	0	1	0	0	1	0	1	0	1	1	0	0	1	1	1	0	1	0	1	0	0	0	1	1	0	0	0	0
Kar_Har_23	KAR_HAR	KAR	HAR	E	0	0	0	0	0	1	0	0	0	0	1	1	0	0	0	1	1	0	1	1	1	1	0	1	0	1	1	0	0	0	1	1	0	1	0	0	1	0	0	0	1	1	1	0	0
Kar_Har_24	KAR_HAR	KAR	HAR	H	1	0	0	0	0	0	0	0	0	0	0	0	0	0	0	1	0	0	0	0	0	0	0	0	0	0	1	0	0	0	1	1	0	0	0	0	0	0	0	0	0	1	0	0	0
Kar_Har_25	KAR_HAR	KAR	HAR	T	2	0	0	0	0	0	0	0	1	0	0	0	0	0	0	0	0	0	0	0	0	1	0	0	1	0	1	0	0	0	0	0	0	1	0	0	0	0	0	0	0	0	0	0	0
Kar_Har_26	KAR_HAR	KAR	HAR	E	0	1	1	1	0	0	1	0	1	1	0	1	0	1	0	1	0	0	1	0	1	0	0	0	1	0	1	0	0	0	1	1	0	1	0	0	1	1	0	0	0	0	0	1	1
Kar_Har_27	KAR_HAR	KAR	HAR	H	1	0	0	0	0	0	0	0	0	1	0	1	0	0	0	0	0	0	0	0	1	1	0	1	0	0	1	0	0	0	1	1	0	1	0	0	0	0	0	0	0	0	1	0	0
Kar_Har_28	KAR_HAR	KAR	HAR	T	2	0	0	1	0	0	0	1	0	1	0	0	0	1	0	1	0	0	0	0	1	1	0	0	0	0	1	0	1	0	0	0	0	1	0	0	0	1	0	0	0	1	0	0	0
Kar_Har_29	KAR_HAR	KAR	HAR	NA	NA	0	0	1	0	1	1	0	1	0	1	0	0	0	0	1	0	0	0	0	0	1	0	0	1	1	1	1	0	0	0	0	1	1	0	0	0	0	0	0	1	0	0	0	0
Kar_Har_30	KAR_HAR	KAR	HAR	NA	NA	1	0	1	0	1	1	0	1	0	0	0	0	0	0	1	0	0	0	1	1	1	0	1	1	0	1	0	0	0	1	1	0	1	0	0	1	1	0	0	0	0	0	0	0
Kar_Ref_04	KAR_REF	KAR	REF	T	2	0	0	1	0	0	0	1	1	1	0	0	0	0	0	1	0	0	0	0	0	0	0	1	0	0	1	0	0	0	1	1	0	1	0	0	0	1	0	0	1	1	0	1	1
Kar_Ref_05	KAR_REF	KAR	REF	NA	NA	1	0	1	1	0	1	0	1	1	1	1	0	0	0	1	1	0	1	0	0	1	0	1	1	0	1	0	0	0	1	1	0	1	0	0	1	1	0	0	0	0	0	0	0
Kar_Ref_06	KAR_REF	KAR	REF	NA	NA	0	1	1	0	0	1	0	1	1	0	1	0	1	1	0	1	0	1	0	1	1	0	1	1	1	1	1	0	0	1	1	0	1	0	0	1	1	0	0	1	1	0	1	0
Kar_Ref_07	KAR_REF	KAR	REF	E	0	0	0	1	0	1	0	0	0	0	0	1	0	0	0	1	0	0	1	0	1	0	0	1	0	0	1	0	0	0	1	1	0	1	0	0	0	0	0	0	1	0	1	0	0
Kar_Ref_08	KAR_REF	KAR	REF	E	0	0	0	0	0	0	0	0	0	0	0	1	0	0	0	1	0	0	0	0	0	0	0	0	0	0	1	0	0	0	1	0	1	1	0	0	0	0	0	0	1	0	0	1	0
Kar_Ref_09	KAR_REF	KAR	REF	NA	NA	1	0	1	0	0	1	0	0	1	0	0	1	0	0	1	1	0	0	0	0	1	0	0	1	0	1	0	0	0	1	0	0	1	0	0	0	1	0	0	0	1	0	0	0
Kar_Ref_10	KAR_REF	KAR	REF	E	0	0	0	0	0	0	0	0	0	0	0	1	0	0	0	1	0	0	0	0	1	0	0	0	0	1	1	0	0	0	0	0	0	1	0	0	0	0	0	1	0	0	0	0	0
Kar_Ref_11	KAR_REF	KAR	REF	H	1	1	0	1	0	0	1	1	1	1	0	1	0	0	0	1	0	0	1	0	0	1	1	0	1	0	1	0	0	0	1	0	1	1	0	0	0	0	0	0	0	1	0	1	0
Kar_Ref_12	KAR_REF	KAR	REF	H	1	0	1	1	1	1	0	0	1	0	1	1	0	0	0	1	1	1	1	0	1	1	0	0	1	0	1	0	0	0	0	1	1	1	1	0	1	1	0	0	1	0	0	1	0
Kar_Ref_13	KAR_REF	KAR	REF	H	1	0	0	1	0	0	0	1	0	0	0	1	0	0	0	0	1	0	0	0	0	0	0	1	0	0	1	0	0	0	1	0	0	1	0	0	0	0	0	0	0	1	0	1	0
Kar_Ref_14	KAR_REF	KAR	REF	NA	NA	1	0	0	0	1	0	0	1	1	0	1	0	0	0	0	0	1	0	1	1	1	0	1	1	0	1	0	0	0	1	1	0	1	1	0	0	0	0	1	1	1	0	1	0
Kar_Ref_15	KAR_REF	KAR	REF	NA	NA	0	1	1	0	0	0	1	0	1	0	1	0	0	0	1	0	0	0	0	0	1	0	1	1	1	1	0	0	0	1	0	0	1	0	0	0	1	0	0	0	0	0	1	0
Kar_Ref_16	KAR_REF	KAR	REF	T	2	0	0	1	0	0	1	1	1	1	0	1	0	0	0	1	1	0	0	0	0	1	0	0	1	0	1	0	0	0	0	0	0	1	0	0	1	1	0	0	0	0	1	0	0
Kar_Ref_17	KAR_REF	KAR	REF	E	0	1	1	1	0	1	0	1	1	0	1	1	0	0	0	1	0	0	0	1	0	1	1	1	0	0	1	0	0	0	1	1	0	1	0	0	1	0	0	0	1	0	0	1	0
Kar_Ref_18	KAR_REF	KAR	REF	E	0	1	1	1	0	1	1	0	0	0	0	1	0	1	0	1	0	0	0	0	0	0	1	1	0	0	1	1	0	0	0	1	1	1	0	0	0	1	1	0	0	1	0	0	0
Kar_Ref_19	KAR_REF	KAR	REF	H	1	0	0	0	0	1	0	0	1	0	0	1	0	0	0	1	0	0	0	0	0	0	0	0	0	0	1	0	0	0	1	0	0	0	0	0	0	0	0	1	0	0	1	0	0
Kar_Ref_20	KAR_REF	KAR	REF	H	1	1	0	1	0	1	1	1	1	0	1	1	0	0	0	1	1	1	0	0	0	0	0	1	1	0	0	0	0	0	1	0	0	1	0	0	0	0	0	0	0	0	0	0	0
Kar_Ref_21	KAR_REF	KAR	REF	NA	NA	1	1	1	0	0	1	1	1	1	0	1	0	1	0	1	1	0	0	1	1	1	0	0	1	1	1	0	0	0	1	0	1	1	1	0	1	1	0	0	0	1	0	1	1
Kar_Ref_22	KAR_REF	KAR	REF	H	1	0	0	0	0	0	0	1	0	1	0	0	0	0	1	1	0	0	0	0	0	0	0	0	0	0	1	0	0	0	0	1	0	0	0	0	0	0	0	0	1	1	0	0	1
Kar_Ref_23	KAR_REF	KAR	REF	E	0	0	0	0	0	0	0	0	0	0	0	0	0	1	1	1	0	0	0	0	0	0	0	1	0	0	1	0	0	0	0	1	0	0	0	0	0	0	0	0	1	1	1	0	1
Kar_Ref_24	KAR_REF	KAR	REF	NA	NA	0	0	1	0	0	0	0	0	1	0	1	0	0	0	1	0	0	0	0	0	1	0	1	0	0	1	0	0	1	1	1	0	1	0	1	0	0	0	0	0	1	1	0	0
Kar_Ref_25	KAR_REF	KAR	REF	E	0	1	0	1	0	0	0	0	1	0	0	0	0	0	0	1	0	0	0	0	0	0	0	0	0	0	1	0	0	0	0	1	0	1	0	0	0	0	0	0	0	1	0	0	1
Kar_Ref_26	KAR_REF	KAR	REF	H	1	0	0	0	0	0	0	0	0	0	0	0	0	0	0	1	0	0	0	0	0	0	0	0	0	0	1	0	0	0	0	0	0	1	0	0	0	0	0	0	0	0	0	1	0
Kar_Ref_27	KAR_REF	KAR	REF	E	0	0	1	0	0	0	1	0	1	0	0	1	0	0	0	1	1	0	1	0	0	1	1	1	0	0	1	0	0	0	1	1	1	1	0	0	0	1	0	1	0	1	0	1	0
Kar_Ref_28	KAR_REF	KAR	REF	E	0	0	0	0	0	0	0	1	0	1	0	1	0	0	0	0	0	0	0	0	0	1	0	1	0	0	1	0	0	0	1	1	1	1	1	0	0	0	0	0	1	1	0	1	0
Kar_Ref_29	KAR_REF	KAR	REF	E	0	0	0	0	0	0	0	0	0	0	1	1	0	0	0	1	1	0	0	0	0	1	0	0	0	0	1	0	0	0	1	1	1	0	0	1	0	0	0	0	0	0	0	0	0
Kar_Ref_30	KAR_REF	KAR	REF	E	0	1	0	1	0	0	0	0	1	1	0	1	0	0	1	0	0	1	1	0	0	1	0	1	0	0	1	0	0	0	1	1	0	1	0	0	0	1	0	0	0	0	0	1	0
Kar_STP_01	KAR_STP	KAR	STP	E	0	1	1	0	0	0	0	0	0	0	0	1	0	0	0	1	0	1	1	0	0	0	0	1	0	0	1	0	0	0	0	0	0	1	0	0	0	0	0	0	0	1	1	0	0
Kar_STP_03	KAR_STP	KAR	STP	H	1	0	1	1	0	0	0	0	0	0	1	1	0	0	0	1	0	0	0	0	0	0	0	0	0	0	1	0	0	0	1	1	0	0	0	0	0	0	0	0	0	0	1	0	0
Kar_STP_04	KAR_STP	KAR	STP	NA	NA	0	0	1	0	1	0	0	1	0	0	0	0	0	0	1	0	0	0	0	0	0	0	0	1	1	1	0	1	0	1	1	0	1	0	0	1	0	0	0	0	0	0	1	0
Kar_STP_08	KAR_STP	KAR	STP	NA	NA	0	0	1	0	1	0	1	0	0	0	0	0	0	0	1	0	1	0	0	1	1	1	0	1	0	1	0	0	0	1	0	0	1	0	0	0	0	0	0	0	0	0	0	0
Kar_STP_09	KAR_STP	KAR	STP	NA	NA	0	1	1	0	0	1	0	0	0	0	0	0	0	0	1	0	0	0	0	0	1	0	0	1	0	1	0	0	0	0	0	0	1	0	0	0	1	0	0	0	0	0	0	0
Kar_STP_10	KAR_STP	KAR	STP	H	1	1	0	0	0	0	0	0	0	0	0	0	0	0	0	1	0	0	0	0	0	0	0	0	0	0	1	0	0	0	0	1	0	1	0	0	0	0	0	0	0	1	0	0	0
Kar_STP_12	KAR_STP	KAR	STP	H	1	1	0	1	0	0	1	1	0	0	0	0	1	0	0	1	0	1	0	0	0	1	0	0	1	1	1	0	0	0	1	1	0	1	0	0	0	0	0	0	0	0	0	0	0
Kar_STP_13	KAR_STP	KAR	STP	H	1	0	1	0	0	0	1	0	1	0	0	1	0	0	0	0	1	0	0	0	0	0	0	0	1	0	1	0	0	0	1	1	0	1	0	0	0	0	0	0	1	0	1	0	0
Kar_STP_14	KAR_STP	KAR	STP	E	0	0	0	0	0	0	1	0	1	0	1	1	0	0	0	1	0	0	0	0	0	0	0	1	0	0	1	0	0	0	1	1	0	1	0	0	0	0	0	0	0	1	0	0	0
Kar_STP_15	KAR_STP	KAR	STP	H	1	1	1	1	0	1	0	0	1	0	0	1	0	0	0	1	0	0	1	0	0	1	0	1	0	0	1	1	0	0	1	1	0	1	1	0	0	0	0	0	0	1	1	0	0
Kar_STP_16	KAR_STP	KAR	STP	NA	NA	1	0	0	0	1	0	1	0	1	0	1	0	0	0	0	0	0	0	0	0	1	0	1	1	1	1	0	0	0	0	0	0	1	0	0	0	0	0	0	1	0	0	1	0
Kar_STP_17	KAR_STP	KAR	STP	H	1	0	0	1	0	0	1	0	0	0	0	1	0	0	1	1	1	0	0	0	0	0	0	0	0	0	1	1	0	0	1	0	0	1	0	0	0	0	0	1	0	0	0	0	0
Kar_STP_18	KAR_STP	KAR	STP	T	2	0	1	1	1	0	1	0	1	1	0	0	0	0	0	1	0	0	0	0	0	1	0	0	1	0	1	1	0	0	0	0	1	1	0	0	0	0	0	0	0	1	0	0	0
Kar_STP_19	KAR_STP	KAR	STP	H	1	0	0	1	0	0	1	0	0	0	0	1	0	1	0	1	0	0	0	0	1	1	0	0	1	0	1	0	0	1	1	1	0	1	0	0	0	1	0	0	1	1	0	1	0
Kar_STP_20	KAR_STP	KAR	STP	T	2	1	0	1	0	0	0	0	0	0	0	1	0	0	1	1	0	0	0	0	0	0	0	1	0	0	1	0	0	0	1	1	1	1	1	0	1	1	0	0	1	0	1	0	0
Kar_STP_21	KAR_STP	KAR	STP	NA	NA	1	0	1	0	0	1	1	1	0	1	0	1	1	0	1	0	1	1	0	1	1	0	1	1	0	1	1	1	0	1	1	1	1	1	0	1	0	0	1	0	1	1	1	1
Kar_STP_22	KAR_STP	KAR	STP	NA	NA	1	0	1	0	0	1	1	0	1	0	1	0	1	0	1	0	1	0	1	1	1	1	0	1	1	1	0	0	0	1	1	0	1	1	0	1	0	0	0	1	1	0	1	0
Kar_STP_23	KAR_STP	KAR	STP	E	0	1	0	0	0	0	1	0	1	1	0	1	0	0	0	1	0	0	1	0	0	0	0	1	0	0	1	1	0	0	1	1	0	1	0	1	0	0	0	1	0	1	1	0	0
Kar_STP_24	KAR_STP	KAR	STP	E	0	1	0	1	0	0	0	0	0	1	1	0	0	0	0	1	0	0	0	0	1	1	0	0	1	0	1	0	0	0	1	0	0	0	0	0	0	0	0	0	0	1	0	0	0
Kar_STP_25	KAR_STP	KAR	STP	NA	NA	0	0	1	0	1	0	0	0	1	0	0	0	0	0	0	0	0	0	0	1	1	0	0	0	0	1	0	0	0	1	1	0	0	0	0	0	0	0	0	0	0	0	0	0
Kar_STP_26	KAR_STP	KAR	STP	T	2	0	0	1	0	0	0	0	1	0	0	1	0	0	0	0	1	0	0	0	0	1	0	0	0	0	1	0	0	0	1	1	0	1	0	1	0	0	0	0	1	0	0	1	0
Kar_STP_27	KAR_STP	KAR	STP	H	1	0	1	1	0	1	1	0	1	0	0	1	1	0	0	1	1	1	0	0	0	1	0	1	1	0	1	0	0	0	1	1	0	1	0	0	0	0	0	0	0	1	0	0	0
Kar_STP_28	KAR_STP	KAR	STP	E	0	0	0	1	0	0	0	0	0	0	0	0	0	0	0	1	1	0	0	0	0	0	0	0	0	0	1	0	0	0	1	1	0	0	0	0	0	0	0	0	0	1	0	1	0
Kar_STP_29	KAR_STP	KAR	STP	NA	NA	0	1	1	0	0	1	1	0	1	0	0	1	0	0	1	0	0	0	0	0	1	0	0	1	1	1	0	0	0	1	0	0	1	0	0	0	1	0	1	0	1	0	1	0
Kar_STP_30	KAR_STP	KAR	STP	NA	NA	1	0	1	0	0	0	0	0	1	0	0	0	0	0	0	0	0	0	0	0	0	0	1	0	0	1	0	0	0	0	0	0	0	0	0	0	0	0	0	0	1	0	0	1
GDA_Har_01	GDA_HAR	GDA	HAR	T	2	1	0	1	0	0	0	0	1	0	0	1	0	0	0	1	0	1	0	0	0	0	0	1	1	0	1	0	0	0	1	1	0	1	0	0	0	0	0	0	1	0	1	1	0
GDA_Har_02	GDA_HAR	GDA	HAR	H	1	0	0	0	0	1	1	0	0	1	1	0	0	0	0	1	1	0	1	1	0	0	0	0	0	0	1	0	0	0	1	1	0	1	0	0	0	0	0	0	0	1	0	0	0
GDA_Har_03	GDA_HAR	GDA	HAR	E	0	1	0	1	0	0	0	0	0	1	0	0	0	0	0	1	1	0	0	0	1	1	0	1	1	0	1	0	0	0	1	1	0	1	1	0	1	1	0	0	0	1	0	1	0
GDA_Har_04	GDA_HAR	GDA	HAR	E	0	0	0	0	0	0	0	0	1	0	0	1	0	0	0	1	0	0	0	0	0	1	0	1	0	0	1	0	0	0	1	1	0	1	0	0	0	0	0	0	0	0	0	0	0
GDA_Har_05	GDA_HAR	GDA	HAR	H	1	0	0	1	0	0	0	0	1	0	0	1	0	0	0	1	0	0	0	0	1	1	0	0	0	0	1	0	0	0	1	0	1	1	0	0	1	0	0	1	0	1	0	0	0
GDA_Har_06	GDA_HAR	GDA	HAR	T	2	0	1	1	0	0	0	0	1	1	0	1	0	0	1	1	0	0	0	0	1	1	0	0	0	0	1	0	0	0	1	0	1	1	0	0	0	0	0	1	0	0	1	0	0
GDA_Har_07	GDA_HAR	GDA	HAR	H	1	1	1	1	0	0	1	1	0	1	0	1	0	0	0	1	0	0	0	1	0	1	1	0	1	1	1	1	0	0	1	1	0	1	1	0	1	0	0	0	1	0	1	1	1
GDA_Har_08	GDA_HAR	GDA	HAR	E	0	0	0	0	0	0	0	0	1	1	0	1	0	0	0	1	0	0	0	0	0	0	1	0	0	0	1	0	0	0	0	1	0	1	0	0	1	1	0	1	1	1	1	0	0
GDA_Har_09	GDA_HAR	GDA	HAR	H	1	0	0	1	0	1	0	1	0	0	0	1	0	0	0	1	1	0	0	0	0	1	0	0	1	0	1	0	0	0	1	1	1	1	0	0	1	0	0	0	0	0	0	0	0
GDA_Har_10	GDA_HAR	GDA	HAR	H	1	0	1	1	0	1	0	1	1	1	0	1	0	0	0	1	0	0	0	0	1	1	0	1	1	0	1	1	0	0	1	1	1	1	1	0	1	0	0	1	0	1	0	0	0
GDA_Har_11	GDA_HAR	GDA	HAR	E	0	0	1	1	0	0	1	0	1	0	0	1	0	0	0	1	1	1	1	0	1	0	0	1	1	1	1	0	1	0	1	1	0	1	1	0	1	1	0	0	0	1	0	1	0
GDA_Har_12	GDA_HAR	GDA	HAR	E	0	1	0	0	0	0	0	0	0	1	0	1	0	0	0	0	0	0	0	0	0	0	0	1	0	0	1	0	0	0	1	1	0	1	0	1	0	0	0	0	1	0	1	0	0
GDA_Har_13	GDA_HAR	GDA	HAR	H	1	0	0	1	0	1	0	0	1	0	0	0	1	0	0	0	1	0	0	0	0	0	0	1	0	0	1	0	0	0	1	1	0	1	0	1	0	1	0	0	1	0	0	0	0
GDA_Har_14	GDA_HAR	GDA	HAR	E	0	0	0	0	1	0	1	1	0	0	0	1	0	0	0	1	0	0	0	0	0	0	0	1	0	0	1	0	0	0	1	1	0	1	0	0	0	1	0	0	1	1	0	0	0
GDA_Har_21	GDA_HAR	GDA	HAR	T	2	0	0	1	0	1	1	0	0	0	0	1	0	0	0	0	0	0	0	0	0	1	0	0	0	0	1	0	0	0	1	1	0	1	0	0	0	0	1	0	1	1	0	0	0
GDA_Har_22	GDA_HAR	GDA	HAR	E	0	0	0	0	0	0	0	0	1	0	0	1	0	0	0	0	0	0	0	0	0	0	1	1	0	0	1	0	0	0	1	1	0	1	0	0	1	0	0	0	1	1	0	0	0
GDA_Har_23	GDA_HAR	GDA	HAR	E	0	0	0	0	0	0	0	0	0	0	0	0	0	0	0	0	0	0	0	0	0	0	0	0	0	0	1	0	0	0	1	1	0	0	0	1	1	0	0	0	0	1	0	0	0
GDA_Har_24	GDA_HAR	GDA	HAR	E	0	0	0	0	0	0	0	0	0	0	0	0	0	0	0	1	0	0	0	0	0	0	0	0	0	0	1	0	0	0	1	1	0	1	0	0	0	0	0	0	1	1	0	0	1
GDA_Har_25	GDA_HAR	GDA	HAR	E	0	1	0	0	0	0	1	1	0	0	0	0	0	0	0	1	0	0	0	0	0	0	0	1	0	0	1	0	0	0	0	0	1	1	0	0	0	0	0	0	1	1	0	0	1
GDA_Har_26	GDA_HAR	GDA	HAR	H	1	1	0	0	0	0	0	0	1	0	0	1	0	0	0	1	0	0	0	0	0	0	0	0	0	0	1	0	0	0	1	1	0	1	0	1	0	0	0	0	1	1	0	0	1
GDA_Har_27	GDA_HAR	GDA	HAR	H	1	0	1	1	0	0	0	0	0	1	0	0	0	0	0	1	0	0	0	0	0	0	0	0	0	0	1	0	0	0	0	1	0	1	0	0	0	0	0	1	0	1	0	0	1
GDA_Har_28	GDA_HAR	GDA	HAR	E	0	0	0	0	0	0	0	0	0	0	0	1	0	0	0	1	0	0	0	0	0	0	0	0	0	0	1	0	0	0	1	1	0	0	0	0	0	0	0	0	1	0	0	0	1
GDA_Har_29	GDA_HAR	GDA	HAR	E	0	0	0	0	0	0	1	0	0	1	1	0	0	0	0	1	0	0	0	0	0	0	0	0	0	0	1	0	0	0	0	0	1	1	0	0	0	0	0	0	0	0	0	0	0
GDA_Har_30	GDA_HAR	GDA	HAR	E	0	1	1	0	0	0	0	0	0	0	0	0	0	0	0	1	0	0	0	0	0	0	0	0	0	0	1	0	0	0	1	1	0	0	0	1	1	0	0	0	0	1	0	0	0
GDA_Ref_01	GDA_REF	GDA	REF	E	0	0	1	1	0	0	1	0	0	1	0	1	0	0	0	1	0	0	0	0	0	0	0	0	1	0	1	0	0	0	1	0	1	1	0	1	0	0	0	0	0	1	0	0	0
GDA_Ref_02	GDA_REF	GDA	REF	H	1	1	1	1	0	1	0	1	1	0	0	1	0	0	0	1	1	0	0	0	1	1	0	0	1	1	1	1	0	0	0	1	0	1	0	0	0	0	0	0	0	0	0	1	0
GDA_Ref_03	GDA_REF	GDA	REF	E	0	1	0	1	0	1	1	0	0	0	0	1	0	1	0	1	0	0	0	0	1	1	0	0	1	0	1	0	0	0	1	0	0	1	0	0	0	0	0	0	0	1	0	0	0
GDA_Ref_04	GDA_REF	GDA	REF	E	0	1	1	1	0	1	0	1	0	0	1	1	0	0	0	1	0	0	0	0	0	1	1	1	0	0	1	1	0	0	1	1	0	1	0	0	0	0	0	0	1	1	0	0	0
GDA_Ref_05	GDA_REF	GDA	REF	T	2	0	0	1	0	0	0	0	1	0	0	1	0	0	0	0	0	0	0	0	0	0	0	1	0	0	1	0	0	0	1	1	0	1	0	0	0	0	0	0	0	1	0	1	0
GDA_Ref_06	GDA_REF	GDA	REF	H	1	0	1	1	0	1	1	0	1	0	0	0	0	0	0	0	0	0	1	0	0	0	0	1	0	0	1	0	0	0	1	1	0	1	0	0	1	0	0	0	1	1	0	0	0
GDA_Ref_07	GDA_REF	GDA	REF	E	0	0	0	1	0	0	0	0	1	0	0	1	0	0	0	1	0	0	0	0	0	1	0	0	0	0	1	0	1	0	1	1	0	0	1	0	1	0	0	0	0	1	1	0	0
GDA_Ref_08	GDA_REF	GDA	REF	H	1	1	0	1	0	0	0	0	0	0	0	1	0	0	0	1	0	0	1	0	0	0	0	0	0	0	1	1	0	0	1	1	0	1	0	0	0	0	0	1	0	1	0	0	0
GDA_Ref_09	GDA_REF	GDA	REF	H	1	0	1	1	0	0	1	0	1	1	1	1	0	0	0	1	0	1	1	0	0	1	0	0	1	0	1	0	0	0	1	0	1	1	0	0	1	1	0	0	0	1	0	0	0
GDA_Ref_10	GDA_REF	GDA	REF	H	1	1	0	1	1	0	0	0	1	1	0	0	0	0	0	0	0	1	0	0	0	1	0	0	1	0	1	0	0	1	1	1	0	0	0	0	0	0	0	0	1	1	0	0	0
GDA_Ref_11	GDA_REF	GDA	REF	E	0	0	1	1	0	1	0	0	0	1	1	0	0	0	0	1	1	0	0	0	0	0	0	0	1	1	1	0	1	0	0	0	0	1	1	0	0	1	0	0	0	1	0	1	0
GDA_Ref_12	GDA_REF	GDA	REF	H	1	0	0	0	0	0	0	0	0	0	0	1	0	0	1	1	1	0	0	0	0	0	0	1	0	0	1	0	0	1	1	0	1	1	1	0	0	0	0	0	0	1	0	0	0
GDA_Ref_13	GDA_REF	GDA	REF	E	0	0	1	1	0	1	0	0	0	0	1	1	0	0	0	1	0	1	0	0	0	0	0	1	0	0	1	0	0	1	1	0	0	1	0	0	0	0	0	0	1	1	1	0	0
GDA_Ref_14	GDA_REF	GDA	REF	H	1	0	0	1	0	1	0	1	1	0	0	1	0	0	0	1	1	0	0	0	0	1	0	1	0	0	1	1	1	0	1	1	1	1	0	0	0	0	0	0	0	1	1	0	0
GDA_Ref_15	GDA_REF	GDA	REF	T	2	0	1	0	0	0	0	0	1	0	0	0	0	0	0	0	0	0	0	0	1	1	0	1	0	0	1	0	0	0	1	1	0	1	0	0	1	0	1	0	1	0	0	0	0
GDA_Ref_16	GDA_REF	GDA	REF	E	0	0	0	1	0	0	1	0	1	0	0	0	0	0	0	1	0	0	1	0	1	1	0	1	0	0	1	0	0	0	1	1	1	1	1	1	0	0	0	1	1	1	0	0	0
GDA_Ref_17	GDA_REF	GDA	REF	H	1	0	1	0	0	0	0	1	1	0	0	0	0	0	1	1	0	0	1	0	0	0	0	0	1	0	1	1	0	0	1	1	1	1	1	0	0	1	0	0	0	0	1	0	0
GDA_Ref_18	GDA_REF	GDA	REF	H	1	1	0	0	0	0	0	0	0	0	0	1	0	0	0	1	0	0	0	0	0	0	0	0	0	0	1	0	0	0	1	1	0	0	0	0	0	0	0	0	1	1	0	0	0
GDA_Ref_19	GDA_REF	GDA	REF	E	0	0	1	1	0	0	1	0	0	0	1	0	0	0	0	1	0	0	0	0	1	1	0	0	1	1	1	0	0	0	1	1	0	0	0	0	0	0	0	0	0	1	0	0	0
GDA_Ref_20	GDA_REF	GDA	REF	T	2	0	0	1	0	1	0	0	0	1	0	1	0	1	0	1	0	0	0	0	1	1	1	1	0	0	0	0	0	0	1	1	0	1	0	0	0	0	0	0	0	1	1	0	0
GDA_Ref_21	GDA_REF	GDA	REF	H	1	0	1	1	0	1	0	1	1	1	0	0	1	0	0	1	1	0	0	0	0	1	1	1	1	1	1	0	0	0	1	1	0	1	0	0	0	0	0	0	0	0	1	1	0
GDA_Ref_22	GDA_REF	GDA	REF	E	0	0	1	1	0	0	1	1	0	1	0	1	0	0	1	0	0	0	0	0	0	0	0	0	0	0	1	0	0	0	1	1	1	1	0	0	0	0	0	0	1	1	0	0	0
GDA_Ref_23	GDA_REF	GDA	REF	E	0	0	0	1	0	1	0	1	0	0	0	1	0	0	0	0	0	0	0	0	0	0	0	1	1	0	1	0	1	0	1	1	1	0	0	0	1	0	0	0	0	1	0	1	0
GDA_Ref_24	GDA_REF	GDA	REF	E	0	1	1	0	0	0	0	1	1	0	1	0	1	1	0	1	0	1	0	1	0	0	0	0	1	0	1	0	0	0	1	0	0	1	0	0	1	0	0	0	1	0	0	0	0
GDA_Ref_25	GDA_REF	GDA	REF	E	0	0	0	0	0	0	0	0	0	0	0	0	0	0	0	0	1	0	0	0	0	0	0	0	1	0	1	0	0	0	1	1	0	1	1	0	1	0	0	1	0	1	1	0	0
GDA_Ref_26	GDA_REF	GDA	REF	E	0	1	0	1	0	0	0	0	1	0	1	0	0	0	0	0	0	0	1	0	0	0	1	1	0	0	1	1	0	0	1	0	1	1	0	1	0	1	0	0	1	1	1	0	0
GDA_Ref_27	GDA_REF	GDA	REF	H	1	0	0	0	0	0	1	0	1	0	0	1	0	0	0	1	1	0	0	0	0	0	0	0	0	0	1	1	0	0	1	0	1	1	0	0	1	1	0	0	0	0	1	0	0
GDA_Ref_28	GDA_REF	GDA	REF	H	1	0	0	0	0	0	0	0	0	0	0	0	0	0	0	1	0	0	0	0	0	0	0	0	0	0	1	0	0	0	0	1	0	1	0	0	0	0	0	0	0	1	0	0	0
GDA_Ref_29	GDA_REF	GDA	REF	E	0	0	0	1	0	0	0	0	0	0	0	1	0	0	0	1	0	0	1	0	0	1	0	1	0	0	1	1	0	0	1	1	0	1	0	0	1	0	0	0	0	1	0	0	0
GDA_Ref_30	GDA_REF	GDA	REF	H	1	0	0	0	0	1	0	0	0	0	0	0	0	0	0	1	1	0	0	0	0	0	0	0	0	0	1	0	0	0	0	1	0	1	0	0	0	0	0	0	1	1	0	0	0
GDA_STP_01	GDA_STP	GDA	STP	NA	NA	1	1	1	0	1	1	0	0	0	0	0	0	0	0	1	0	1	0	0	0	0	0	1	1	0	1	0	0	0	1	0	1	1	0	0	0	0	0	0	0	0	0	0	0
GDA_STP_02	GDA_STP	GDA	STP	T	2	0	1	1	0	0	1	1	0	1	0	0	0	0	0	1	0	0	0	0	1	1	0	0	1	0	1	1	0	0	1	1	0	1	0	0	0	0	0	0	1	1	0	1	0
GDA_STP_03	GDA_STP	GDA	STP	H	1	0	0	1	0	0	0	1	1	0	0	1	0	0	0	0	1	0	0	0	1	0	0	1	1	0	1	0	0	0	1	1	0	1	1	0	0	0	0	0	0	1	0	0	0
GDA_STP_04	GDA_STP	GDA	STP	E	0	0	0	1	0	0	0	0	0	0	0	1	0	0	0	1	1	0	0	0	0	0	0	0	0	0	1	0	0	0	1	0	0	1	0	0	1	0	0	0	0	0	0	0	0
GDA_STP_05	GDA_STP	GDA	STP	H	1	0	0	1	0	0	0	1	1	0	0	1	0	0	0	1	0	0	0	0	0	0	0	1	0	0	1	0	0	0	1	1	0	0	0	0	0	0	0	0	1	1	0	1	0
GDA_STP_06	GDA_STP	GDA	STP	H	1	0	1	1	0	0	1	1	1	0	1	1	1	0	0	1	0	0	1	1	0	1	0	1	1	1	1	0	0	1	1	0	0	1	1	0	0	1	0	0	1	1	0	1	0
GDA_STP_07	GDA_STP	GDA	STP	E	0	0	1	1	0	1	0	0	0	0	0	1	0	0	0	1	0	0	0	0	0	0	0	0	0	0	1	1	0	0	1	1	0	1	0	0	0	0	0	0	1	1	1	1	0
GDA_STP_08	GDA_STP	GDA	STP	E	0	0	0	1	0	0	0	0	1	1	0	1	0	0	0	0	0	0	0	1	1	1	0	1	0	0	1	1	0	0	1	1	0	1	0	0	1	0	0	0	1	0	0	0	0
GDA_STP_09	GDA_STP	GDA	STP	E	0	1	0	0	1	0	1	0	1	1	0	1	0	0	0	1	0	1	1	0	1	1	0	1	1	0	1	0	0	0	1	1	0	1	0	0	0	0	0	0	0	0	1	0	0
GDA_STP_10	GDA_STP	GDA	STP	H	1	1	0	0	0	0	0	0	1	1	0	0	0	0	0	1	0	1	0	0	0	1	0	0	0	0	1	0	0	0	1	0	0	1	0	0	0	1	0	0	0	0	0	0	0
GDA_STP_11	GDA_STP	GDA	STP	E	0	0	0	1	0	1	0	1	1	0	0	1	0	0	0	0	0	0	1	0	0	1	0	1	0	0	1	0	0	0	1	1	0	1	0	0	0	0	0	1	0	1	0	0	0
GDA_STP_12	GDA_STP	GDA	STP	T	2	0	0	1	0	0	0	0	0	0	0	0	0	0	0	1	0	0	0	0	0	0	0	0	0	0	1	0	1	0	1	1	0	0	0	0	0	0	0	0	1	1	0	0	0
GDA_STP_13	GDA_STP	GDA	STP	T	2	1	0	0	0	0	0	0	0	0	0	1	0	0	0	1	0	0	1	0	0	0	0	1	0	1	1	0	0	0	1	1	0	1	0	0	0	0	0	0	0	0	1	1	0
GDA_STP_14	GDA_STP	GDA	STP	E	0	0	0	1	0	0	0	0	1	0	0	1	0	1	0	1	1	0	1	0	0	1	0	1	0	0	1	0	0	0	1	1	0	1	0	0	0	1	1	0	0	1	0	0	0
GDA_STP_15	GDA_STP	GDA	STP	T	2	0	0	0	0	0	0	0	0	0	1	1	0	0	0	0	1	0	1	1	0	0	0	1	0	0	1	0	0	0	1	0	1	1	0	0	1	0	0	1	0	0	0	0	0
GDA_STP_16	GDA_STP	GDA	STP	T	2	0	0	1	0	0	0	0	0	1	0	0	0	0	0	0	0	0	0	0	0	0	0	0	1	0	0	0	0	0	1	0	1	1	0	0	0	1	0	1	1	0	0	0	0
GDA_STP_17	GDA_STP	GDA	STP	T	2	1	1	1	0	1	1	1	1	1	0	1	0	0	0	1	1	0	1	0	0	1	0	0	1	0	1	0	1	0	1	1	0	1	1	0	1	0	0	0	1	1	0	1	1
GDA_STP_18	GDA_STP	GDA	STP	E	0	1	1	0	0	0	1	1	1	1	0	1	0	0	0	1	0	0	0	1	0	1	0	0	1	0	1	0	1	0	1	1	0	1	1	0	0	0	0	0	0	1	0	0	0
GDA_STP_19	GDA_STP	GDA	STP	H	1	0	0	1	0	1	0	0	1	0	0	0	0	0	0	1	1	0	0	0	0	1	1	1	0	0	1	0	0	0	1	1	1	1	0	1	0	0	0	1	0	1	1	1	0
GDA_STP_21	GDA_STP	GDA	STP	E	0	1	1	1	0	1	1	0	1	1	0	1	0	0	0	1	1	0	1	1	1	1	0	0	1	1	1	0	0	0	1	1	0	1	1	0	0	0	0	0	0	1	0	1	0
GDA_STP_22	GDA_STP	GDA	STP	H	1	0	1	1	0	0	1	0	0	1	0	1	0	0	0	1	0	0	1	1	1	1	0	1	1	0	1	1	0	0	1	1	0	1	0	0	1	0	0	0	0	1	0	0	0
GDA_STP_23	GDA_STP	GDA	STP	T	2	0	1	0	0	1	1	0	0	0	0	0	0	0	0	1	0	0	0	0	0	1	0	0	1	0	1	0	0	0	1	0	0	0	0	0	0	0	0	0	0	0	0	0	0
GDA_STP_24	GDA_STP	GDA	STP	E	0	0	1	0	0	1	1	0	0	0	0	0	0	0	0	1	0	0	0	0	0	1	0	0	1	0	1	0	0	0	1	0	0	0	0	0	0	0	0	0	0	0	0	0	0
GDA_STP_25	GDA_STP	GDA	STP	T	2	0	0	1	0	1	0	0	0	0	0	1	0	0	0	1	0	0	0	0	0	0	0	0	1	0	1	0	0	0	1	0	0	1	0	0	0	0	0	0	0	0	0	0	0
GDA_STP_26	GDA_STP	GDA	STP	E	0	1	0	1	0	1	0	0	1	0	0	0	0	0	0	1	0	1	0	0	0	0	0	1	1	0	1	0	0	0	1	0	0	0	0	0	0	0	0	0	1	1	0	0	0
GDA_STP_27	GDA_STP	GDA	STP	H	1	1	1	1	1	0	0	0	0	0	1	0	0	0	0	1	0	0	0	0	0	0	0	0	1	0	1	1	0	0	1	1	0	0	0	0	1	1	0	0	0	1	0	0	0
GDA_STP_28	GDA_STP	GDA	STP	H	1	0	0	0	0	0	0	1	0	0	0	0	0	0	0	0	0	0	1	0	1	1	0	1	0	0	1	0	0	0	1	1	0	1	0	1	0	1	0	0	1	1	0	0	0
GDA_STP_29	GDA_STP	GDA	STP	E	0	1	1	0	0	1	0	0	0	0	0	1	0	0	0	0	0	1	0	0	0	1	0	0	0	0	1	0	0	0	0	0	0	1	0	1	0	0	0	0	0	1	0	0	0
GDA_STP_30	GDA_STP	GDA	STP	H	1	0	0	1	1	1	0	0	0	1	0	1	0	0	0	1	0	0	0	0	0	0	0	0	0	0	1	0	0	0	0	0	0	1	0	0	0	0	0	0	0	1	0	0	1
KRI_Har_02	KRI_HAR	KRI	HAR	E	0	1	1	1	0	0	1	0	1	0	1	1	0	1	0	1	0	0	0	0	0	1	1	0	1	1	0	0	0	0	0	1	1	1	1	1	0	0	0	0	0	1	1	0	0
KRI_Har_03	KRI_HAR	KRI	HAR	E	0	1	0	1	0	1	1	0	1	1	1	1	0	1	0	1	0	0	1	0	0	1	0	1	0	1	1	0	0	0	1	1	0	1	1	0	1	1	0	0	0	1	1	0	1
KRI_Har_04	KRI_HAR	KRI	HAR	E	0	0	1	1	0	1	0	0	1	1	0	1	0	1	0	1	1	1	1	0	0	0	0	0	1	1	0	1	0	0	1	1	0	1	0	1	1	1	0	1	0	0	1	0	1
KRI_Har_06	KRI_HAR	KRI	HAR	E	0	1	1	1	0	1	1	0	1	1	1	1	0	1	0	1	0	1	0	1	0	1	0	0	1	1	1	1	0	1	1	1	0	1	1	0	1	1	0	0	0	0	1	0	1
KRI_Har_07	KRI_HAR	KRI	HAR	E	0	0	0	1	0	0	0	0	0	1	0	1	0	0	0	0	0	0	0	0	1	0	1	0	0	0	0	0	0	0	0	0	0	0	0	0	0	0	0	0	0	0	0	0	0
KRI_Har_08	KRI_HAR	KRI	HAR	H	1	0	1	1	0	1	1	0	1	1	0	0	0	1	0	1	0	0	1	0	1	0	0	0	1	0	0	0	0	0	0	1	1	0	0	0	1	1	0	0	0	0	0	0	0
KRI_Har_09	KRI_HAR	KRI	HAR	E	0	0	0	1	0	0	0	0	1	0	0	1	0	1	0	1	0	0	0	0	1	0	0	0	1	0	0	0	0	0	0	0	0	0	0	0	0	0	0	0	0	0	0	0	0
KRI_Har_10	KRI_HAR	KRI	HAR	E	0	0	0	1	0	0	0	1	1	0	0	1	0	0	0	0	0	0	0	0	0	0	0	0	0	0	0	0	0	0	0	0	0	0	0	0	0	0	0	0	0	0	0	0	0
KRI_Har_11	KRI_HAR	KRI	HAR	E	0	0	1	1	0	0	0	1	1	0	0	0	1	0	0	1	1	0	0	0	1	1	0	1	0	0	0	0	0	0	0	0	0	0	1	0	1	0	0	0	0	1	0	0	1
KRI_Har_13	KRI_HAR	KRI	HAR	E	0	1	1	1	0	0	1	1	0	1	0	1	0	0	0	1	0	0	0	0	1	0	1	0	0	0	0	0	0	0	1	0	0	0	0	0	1	0	0	1	0	0	0	1	1
KRI_Har_14	KRI_HAR	KRI	HAR	E	0	1	0	1	0	1	0	1	0	1	0	1	0	1	0	1	0	0	1	0	0	1	1	0	1	1	0	1	0	0	1	1	0	1	0	1	1	0	0	0	0	0	0	1	0
KRI_Har_15	KRI_HAR	KRI	HAR	E	0	1	1	1	0	0	0	1	0	1	0	0	0	0	0	1	0	0	0	0	1	0	0	0	0	0	0	0	0	1	0	0	0	0	0	0	1	1	0	0	0	1	0	0	1
KRI_Har_16	KRI_HAR	KRI	HAR	E	0	0	0	1	0	1	0	0	1	1	0	0	0	0	0	1	0	0	0	0	0	0	0	1	0	0	0	0	0	0	1	0	1	0	1	0	1	1	1	0	1	0	0	0	0
KRI_Har_17	KRI_HAR	KRI	HAR	E	0	1	0	1	0	0	0	1	0	0	1	1	0	0	0	1	0	0	0	0	0	1	0	0	0	0	0	1	1	0	1	0	0	0	0	0	0	1	0	0	0	0	1	0	0
KRI_Har_18	KRI_HAR	KRI	HAR	E	0	1	1	1	0	0	0	0	1	0	0	1	0	0	0	1	0	0	0	0	1	0	0	0	0	0	0	0	0	0	1	0	0	0	0	0	0	0	0	0	0	0	0	0	0
KRI_Har_19	KRI_HAR	KRI	HAR	E	0	0	0	1	0	0	0	0	0	1	0	0	0	0	0	1	0	0	0	0	0	0	0	0	0	1	0	0	0	0	1	0	0	0	1	0	0	0	0	0	0	0	0	0	0
KRI_Har_20	KRI_HAR	KRI	HAR	E	0	0	1	1	0	1	1	0	1	1	0	1	0	0	1	1	1	1	0	1	1	0	1	0	1	0	0	0	0	0	1	1	1	1	0	0	1	0	0	0	0	1	0	1	0
KRI_Har_21	KRI_HAR	KRI	HAR	E	0	0	1	1	0	0	0	0	0	0	1	0	0	0	0	1	0	0	0	0	0	0	0	0	0	0	0	0	0	0	0	1	1	0	0	0	0	0	0	0	0	0	0	0	0
KRI_Har_22	KRI_HAR	KRI	HAR	E	0	1	0	1	0	0	0	0	0	0	0	0	0	0	0	1	0	0	0	0	0	0	0	0	0	0	0	0	0	0	0	0	0	0	0	1	0	0	0	0	0	0	0	0	0
KRI_Har_23	KRI_HAR	KRI	HAR	E	0	0	0	0	0	0	0	0	0	0	0	0	0	0	0	1	0	0	0	0	0	1	1	0	0	0	0	0	0	0	0	0	0	0	0	0	1	0	0	0	0	0	0	0	0
KRI_Har_24	KRI_HAR	KRI	HAR	E	0	1	0	1	0	0	0	0	1	1	0	1	0	0	0	1	0	1	1	0	0	0	0	0	0	1	0	0	0	1	0	0	1	1	0	0	1	1	0	0	1	0	0	0	1
KRI_Har_25	KRI_HAR	KRI	HAR	E	0	0	0	0	0	0	0	0	0	0	0	0	0	0	0	1	0	0	0	0	0	0	0	0	0	0	0	0	0	0	1	0	0	0	0	1	0	0	0	0	1	0	0	0	0
KRI_Har_26	KRI_HAR	KRI	HAR	E	0	0	0	0	0	0	0	0	0	0	0	1	0	0	0	1	1	0	0	0	0	0	0	0	0	0	0	0	0	0	0	0	0	0	0	1	0	0	0	0	0	0	0	0	0
KRI_Har_27	KRI_HAR	KRI	HAR	E	0	1	0	0	0	0	0	0	0	0	0	0	0	1	0	1	0	0	0	0	0	0	0	0	0	0	0	0	0	0	1	0	0	0	0	0	0	0	0	0	0	0	0	0	0
KRI_Har_28	KRI_HAR	KRI	HAR	NA	NA	0	0	0	0	0	1	1	0	0	0	0	0	0	0	1	0	0	0	0	0	0	0	0	0	0	0	0	0	1	1	0	1	0	0	1	0	1	0	1	0	0	0	0	0
KRI_Har_29	KRI_HAR	KRI	HAR	E	0	0	0	0	0	0	0	0	1	0	0	0	0	0	0	1	0	0	0	0	0	0	0	0	1	0	0	0	0	0	0	0	0	0	0	1	0	0	0	0	1	1	0	0	0
KRI_Har_30	KRI_HAR	KRI	HAR	E	0	0	0	0	0	0	0	0	0	0	0	0	1	1	0	1	0	0	0	0	0	0	0	0	0	0	0	0	0	0	0	0	0	0	0	0	0	0	0	0	0	0	0	0	0
KRI_Ref_01	KRI_REF	KRI	REF	NA	NA	1	0	1	0	0	1	0	1	1	1	1	0	0	0	1	0	1	1	0	1	1	0	0	1	1	1	0	0	0	1	1	0	1	1	0	1	0	0	0	1	0	1	0	1
KRI_Ref_02	KRI_REF	KRI	REF	E	0	1	1	1	0	1	0	1	0	0	0	1	0	0	0	1	0	0	1	1	0	1	0	1	1	0	0	0	0	1	0	0	1	1	0	0	1	1	0	0	1	0	1	0	0
KRI_Ref_03	KRI_REF	KRI	REF	E	0	1	1	1	0	0	1	0	0	0	0	0	0	1	0	1	0	1	0	1	0	1	1	0	1	1	0	0	0	0	0	1	0	0	0	0	1	0	0	0	0	0	1	0	0
KRI_Ref_05	KRI_REF	KRI	REF	E	0	1	1	1	0	0	0	1	1	1	0	1	0	0	0	1	0	1	1	0	0	1	0	0	1	0	1	1	0	0	1	0	0	1	0	1	0	1	0	0	0	1	0	0	0
KRI_Ref_06	KRI_REF	KRI	REF	E	0	0	0	1	0	0	0	1	0	1	0	1	0	1	0	1	0	0	0	0	0	0	0	0	0	0	0	0	0	0	0	0	0	0	0	1	0	0	0	1	1	0	0	0	1
KRI_Ref_07	KRI_REF	KRI	REF	E	0	1	0	1	0	0	1	0	1	1	1	1	0	1	0	0	0	1	1	0	1	1	0	0	1	1	1	1	0	0	1	1	0	1	1	0	1	1	0	1	0	0	1	0	1
KRI_Ref_08	KRI_REF	KRI	REF	E	0	0	0	1	0	0	1	0	1	1	0	0	0	1	0	1	0	0	0	0	0	1	0	0	1	1	0	0	0	0	0	1	1	1	0	0	0	1	0	0	0	0	0	0	0
KRI_Ref_09	KRI_REF	KRI	REF	NA	NA	1	0	1	0	1	0	1	0	1	0	0	0	0	1	1	1	1	0	0	1	0	0	1	1	0	1	0	0	0	1	1	0	1	1	1	1	0	0	0	0	0	0	1	0
KRI_Ref_11	KRI_REF	KRI	REF	E	0	0	0	1	0	0	0	0	1	0	0	0	0	0	0	1	0	0	1	0	0	0	0	0	0	1	0	0	0	1	0	1	0	0	0	0	1	0	0	1	0	0	0	0	1
KRI_Ref_12	KRI_REF	KRI	REF	E	0	0	0	1	1	0	0	0	1	0	0	0	0	0	0	1	0	0	0	0	0	0	1	1	0	0	1	0	1	0	1	0	0	1	0	1	0	0	0	1	0	0	0	0	0
KRI_Ref_13	KRI_REF	KRI	REF	NA	NA	0	1	1	0	1	1	0	1	1	1	1	1	1	0	1	0	0	1	0	0	1	0	1	1	0	0	0	0	0	0	1	0	0	0	0	0	0	0	0	0	0	0	0	0
KRI_Ref_14	KRI_REF	KRI	REF	E	0	0	1	1	0	0	0	0	1	0	0	1	1	0	0	0	0	0	0	0	0	1	0	0	0	0	0	1	0	0	0	0	0	1	0	1	0	0	0	0	0	0	0	0	0
KRI_Ref_15	KRI_REF	KRI	REF	E	0	1	0	1	0	1	1	1	0	1	0	1	0	1	0	1	0	1	1	0	1	1	1	1	0	1	1	0	0	0	1	1	0	1	0	0	1	0	0	1	0	1	0	0	0
KRI_Ref_16	KRI_REF	KRI	REF	NA	NA	1	0	1	0	0	0	0	1	1	0	1	0	0	0	1	0	0	1	0	0	0	0	0	1	0	1	1	0	0	0	1	0	0	0	0	1	0	0	0	0	1	0	1	0
KRI_Ref_17	KRI_REF	KRI	REF	E	0	1	1	1	0	1	1	0	0	0	0	0	0	0	1	0	0	0	0	0	1	0	0	1	0	0	0	0	0	0	1	1	0	0	0	0	0	0	0	0	0	0	0	0	0
KRI_Ref_18	KRI_REF	KRI	REF	E	0	1	0	1	0	0	0	0	1	1	0	1	0	0	0	1	0	0	0	0	0	0	0	0	1	1	0	0	1	0	0	0	0	0	1	0	0	0	0	0	0	0	0	0	1
KRI_Ref_19	KRI_REF	KRI	REF	E	0	1	1	1	0	0	0	0	1	0	0	0	0	1	0	1	1	0	0	0	0	0	1	0	0	1	0	1	0	0	1	0	0	1	0	1	1	0	0	0	0	0	0	0	1
KRI_Ref_20	KRI_REF	KRI	REF	H	1	0	1	1	0	1	0	1	1	0	0	0	0	0	0	1	0	0	0	0	0	0	1	0	1	0	0	0	0	0	0	0	0	1	0	0	0	1	0	0	1	1	0	0	0
KRI_Ref_21	KRI_REF	KRI	REF	E	0	0	1	0	0	0	0	1	1	0	0	0	1	1	0	1	1	0	0	1	1	1	0	0	0	1	0	1	0	0	1	0	0	0	1	1	1	1	0	0	0	0	0	0	0
KRI_Ref_22	KRI_REF	KRI	REF	E	0	0	0	1	0	1	1	0	0	1	0	0	0	0	0	1	1	0	1	0	1	0	1	1	1	0	0	1	0	0	1	1	1	1	0	1	1	1	0	0	0	0	0	0	1
KRI_Ref_23	KRI_REF	KRI	REF	E	0	0	1	1	0	1	0	0	1	1	0	1	0	0	0	1	0	0	0	0	0	1	1	0	0	0	0	1	0	0	1	1	0	1	0	1	0	1	1	0	0	1	0	0	0
KRI_Ref_24	KRI_REF	KRI	REF	E	0	0	1	0	0	1	1	0	1	1	0	0	0	0	0	1	0	0	1	0	0	0	0	0	0	1	0	1	0	0	1	1	0	1	0	1	1	1	1	0	0	0	1	0	0
KRI_Ref_25	KRI_REF	KRI	REF	E	0	0	0	1	0	1	0	1	1	1	0	1	0	0	0	1	0	0	0	0	0	1	0	0	0	0	0	1	0	0	1	1	0	1	0	1	1	1	0	1	0	0	1	1	1
KRI_Ref_26	KRI_REF	KRI	REF	NA	NA	1	0	1	0	0	0	0	0	0	0	0	0	0	0	0	0	0	0	0	0	0	0	0	0	0	1	1	0	0	0	0	0	1	1	0	0	0	0	0	0	0	0	0	0
KRI_Ref_27	KRI_REF	KRI	REF	E	0	0	0	0	0	0	0	0	0	0	0	0	0	1	0	1	0	0	0	0	0	0	0	0	0	0	0	0	0	0	0	0	0	0	0	0	0	0	0	0	0	0	0	0	0
KRI_Ref_28	KRI_REF	KRI	REF	E	0	1	0	1	0	0	0	0	0	0	0	0	0	0	0	0	0	0	0	0	0	0	0	0	0	0	1	1	0	0	1	0	1	1	0	0	0	0	0	0	0	0	0	0	0
KRI_Ref_29	KRI_REF	KRI	REF	E	0	0	1	1	0	0	1	1	1	0	0	0	0	0	0	1	0	0	0	1	0	0	0	0	0	1	0	0	1	0	1	0	1	0	1	0	1	0	1	0	0	0	0	0	0
KRI_Ref_30	KRI_REF	KRI	REF	E	0	1	0	1	0	0	1	1	0	1	0	1	0	1	0	1	0	0	1	0	1	1	0	0	0	0	1	0	0	0	1	0	1	1	0	0	0	1	0	1	0	0	0	0	0
KRI_STP_01	KRI_STP	KRI	STP	E	0	1	1	1	1	0	0	0	1	0	0	1	0	0	0	0	0	0	0	0	0	1	0	1	1	1	0	0	0	1	0	0	0	1	1	1	0	0	0	0	0	1	1	0	0
KRI_STP_02	KRI_STP	KRI	STP	E	0	1	1	0	0	0	0	1	0	0	0	0	0	0	1	1	0	0	0	0	0	0	0	0	1	0	1	0	0	0	1	1	0	0	0	0	0	0	0	0	0	0	0	0	0
KRI_STP_05	KRI_STP	KRI	STP	E	0	0	1	1	0	0	0	0	0	0	1	0	0	0	0	1	0	1	0	0	1	1	0	1	1	1	0	0	0	0	1	1	0	1	0	1	1	0	0	1	0	0	1	1	1
KRI_STP_06	KRI_STP	KRI	STP	E	0	1	1	1	0	1	0	1	1	1	1	1	0	0	1	1	0	1	1	0	1	0	1	1	1	0	0	1	0	0	1	1	1	0	0	0	1	1	0	0	0	0	0	1	0
KRI_STP_07	KRI_STP	KRI	STP	E	0	1	0	1	0	1	1	0	1	1	0	0	0	1	0	1	0	1	1	1	0	1	0	0	1	1	0	0	0	0	1	0	1	0	0	1	1	0	0	0	0	0	1	1	1
KRI_STP_08	KRI_STP	KRI	STP	E	0	0	0	1	0	0	1	0	1	1	0	0	0	0	0	1	0	0	0	0	0	1	1	0	0	0	0	0	0	0	0	0	0	0	0	0	0	0	0	0	0	0	0	0	0
KRI_STP_09	KRI_STP	KRI	STP	E	0	0	1	1	0	0	0	0	1	0	0	0	0	1	0	1	0	0	0	0	1	0	0	0	0	0	0	1	0	0	0	0	0	0	0	0	0	0	0	0	1	0	0	1	0
KRI_STP_10	KRI_STP	KRI	STP	NA	NA	1	1	0	0	1	1	0	1	1	0	0	0	0	0	1	0	0	1	0	0	0	0	0	1	0	0	0	0	0	1	0	1	0	1	0	1	0	0	0	0	0	1	0	0
KRI_STP_11	KRI_STP	KRI	STP	E	0	1	0	1	0	0	0	0	1	0	0	1	0	0	0	1	0	1	0	0	0	1	0	0	0	0	0	0	0	0	0	1	0	0	0	0	0	0	0	0	0	0	0	1	0
KRI_STP_12	KRI_STP	KRI	STP	E	0	0	1	1	0	0	0	0	1	0	0	0	0	0	0	1	0	0	0	0	0	0	0	0	1	0	0	0	0	0	0	0	0	0	0	1	0	0	0	0	0	0	0	0	0
KRI_STP_13	KRI_STP	KRI	STP	E	0	1	0	1	0	1	1	0	1	1	1	1	0	0	0	1	0	0	1	1	0	1	0	1	0	1	1	0	0	0	1	1	0	1	0	0	1	1	0	0	0	0	0	0	1
KRI_STP_14	KRI_STP	KRI	STP	E	0	0	0	1	0	1	0	0	1	0	0	0	0	1	0	0	0	0	0	0	1	0	0	0	1	0	0	0	0	0	0	0	1	0	0	0	0	0	0	0	1	0	0	0	0
KRI_STP_15	KRI_STP	KRI	STP	E	0	0	0	1	0	0	0	0	1	1	0	1	0	0	0	1	0	0	1	0	0	0	0	0	1	0	1	0	0	1	0	1	0	0	0	0	1	0	1	0	1	0	0	0	0
KRI_STP_16	KRI_STP	KRI	STP	E	0	1	0	1	0	0	1	0	0	0	0	0	0	0	0	1	1	0	0	0	0	1	0	0	0	0	0	0	0	1	0	1	1	0	0	1	0	1	0	0	0	0	0	1	0
KRI_STP_17	KRI_STP	KRI	STP	E	0	0	0	1	0	0	0	1	0	1	0	1	0	0	0	1	0	0	0	0	1	1	0	0	0	0	0	0	0	1	0	0	1	0	0	0	1	1	0	1	0	0	1	1	0
KRI_STP_18	KRI_STP	KRI	STP	E	0	0	0	1	0	0	1	1	1	1	0	0	0	0	0	1	0	0	0	0	0	0	0	0	1	0	0	0	0	0	0	0	0	1	0	1	0	0	1	0	0	0	0	1	0
KRI_STP_19	KRI_STP	KRI	STP	E	0	0	0	1	0	0	1	1	0	1	1	0	0	0	0	1	0	0	1	0	1	1	0	1	0	0	0	0	0	0	1	0	0	0	0	0	1	1	0	1	0	0	0	0	0
KRI_STP_21	KRI_STP	KRI	STP	E	0	0	1	1	0	0	0	0	1	1	0	0	0	0	0	1	0	1	0	0	1	1	0	0	0	0	0	1	0	0	1	0	1	0	0	1	1	1	0	0	0	0	0	0	1
KRI_STP_22	KRI_STP	KRI	STP	E	0	1	0	0	0	1	1	0	1	0	0	0	0	1	0	1	0	0	1	0	0	0	0	0	0	0	0	0	0	0	1	0	0	1	0	0	0	1	0	1	1	0	0	0	0
KRI_STP_23	KRI_STP	KRI	STP	NA	NA	0	0	1	0	0	0	0	1	0	0	0	0	0	0	1	0	0	0	0	0	0	0	0	1	1	0	0	0	0	0	0	0	1	0	1	1	1	0	0	0	1	0	0	1
KRI_STP_24	KRI_STP	KRI	STP	NA	NA	0	0	1	0	0	1	1	1	0	1	0	0	0	0	1	1	0	0	0	0	0	1	0	1	0	0	0	0	0	0	1	0	1	0	0	0	0	0	0	0	0	0	0	0
KRI_STP_25	KRI_STP	KRI	STP	E	0	0	0	0	0	0	0	0	0	0	0	0	0	0	0	1	0	0	0	0	0	0	0	0	0	0	0	0	0	0	0	1	1	0	0	0	0	0	0	1	0	0	0	0	0
KRI_STP_26	KRI_STP	KRI	STP	E	0	0	0	1	0	0	1	0	1	1	0	1	0	0	0	1	0	0	0	0	0	0	0	0	0	1	0	0	0	0	1	0	1	0	0	1	1	1	0	1	0	0	0	0	0
KRI_STP_28	KRI_STP	KRI	STP	E	0	0	1	1	1	0	0	0	1	0	0	0	0	1	0	0	0	0	1	0	0	0	0	0	0	0	0	0	0	0	1	0	0	1	0	1	0	1	0	1	1	0	0	1	1
KRI_STP_29	KRI_STP	KRI	STP	E	0	1	0	1	0	0	1	0	0	0	0	0	0	0	0	1	0	0	0	0	0	0	0	0	0	0	0	0	0	0	1	0	1	1	0	0	0	0	0	0	0	0	0	0	1
KRI_STP_30	KRI_STP	KRI	STP	E	0	0	1	0	0	0	0	0	1	0	0	0	1	0	0	1	0	0	0	0	0	1	0	0	1	1	0	1	0	0	1	0	0	0	0	1	1	1	0	1	0	0	0	0	0
[truncated: 310 more columns]

## Sheet: BP
SAMPLE	SITE	LOCATION	POLLUTION_TYPE	SPECIES	TROSSULUS	PrimH_1	PrimH_2	PrimH_3	PrimH_4	PrimH_5	PrimH_6	PrimH_7	PrimH_8	PrimH_9	PrimH_10	PrimH_13	PrimH_14	PrimH_18	PrimH_19	PrimH_21	PrimH_22	PrimH_23	PrimH_24	PrimH_25	PrimH_26	PrimH_27	PrimH_28	PrimH_29	PrimH_30	PrimH_31	PrimH_33	PrimH_35	PrimH_37	PrimH_38	PrimH_39	PrimH_40	PrimH_41	PrimH_42	PrimH_43	PrimH_44	PrimH_45	PrimH_46	PrimH_48	PrimH_49	PrimH_50	PrimH_51	PrimH_52	PrimH_54	PrimH_55
Ask_Har_01	ASK_HAR	ASK	HAR	H	1	0	0	0	0	0	0	0	0	0	0	0	1	0	0	1	0	0	1	0	1	0	0	1	0	0	1	0	0	0	1	0	0	1	1	0	0	0	1	0	1	1	0	1	0
Ask_Har_02	ASK_HAR	ASK	HAR	H	1	0	1	0	0	1	1	0	0	0	0	1	0	0	0	1	0	0	1	0	0	0	0	1	0	0	1	0	0	0	1	1	0	1	0	0	0	0	0	0	0	1	1	0	0
Ask_Har_03	ASK_HAR	ASK	HAR	E	0	0	0	0	0	0	0	0	0	1	0	1	0	0	0	0	0	0	0	0	0	1	0	0	1	0	1	0	0	0	1	1	0	1	0	0	0	0	0	0	1	1	0	0	0
Ask_Har_04	ASK_HAR	ASK	HAR	E	0	0	0	0	0	1	0	0	1	1	0	1	0	0	0	0	0	0	1	0	0	0	0	0	1	0	1	0	0	0	1	1	0	1	0	0	0	0	0	0	0	0	1	0	0
Ask_Har_05	ASK_HAR	ASK	HAR	E	0	0	0	1	0	1	0	0	1	0	0	1	0	0	0	1	0	0	1	0	0	1	0	1	0	0	1	0	0	0	1	1	0	1	0	0	0	0	0	0	1	1	0	1	0
Ask_Har_06	ASK_HAR	ASK	HAR	E	0	1	0	1	0	0	1	0	0	0	0	1	1	0	0	1	0	0	0	0	0	1	0	0	0	0	1	0	1	0	1	0	0	1	0	0	0	0	0	0	0	0	1	0	0
Ask_Har_07	ASK_HAR	ASK	HAR	H	1	0	0	0	0	0	0	0	0	0	0	1	0	0	0	0	0	0	0	0	0	1	0	1	0	0	1	1	0	1	1	1	0	1	0	0	1	0	0	1	0	0	0	1	1
Ask_Har_08	ASK_HAR	ASK	HAR	E	0	1	0	1	0	0	0	0	0	0	0	1	1	0	0	0	0	0	0	0	0	0	0	1	1	0	1	0	0	1	1	0	0	1	0	1	0	0	0	0	1	0	1	1	0
Ask_Har_09	ASK_HAR	ASK	HAR	E	0	0	0	0	0	1	1	0	0	0	0	0	0	0	0	1	0	0	1	0	0	0	0	1	0	0	0	0	0	1	0	0	0	0	0	0	0	1	0	0	0	0	0	0	0
Ask_Har_10	ASK_HAR	ASK	HAR	E	0	1	0	0	0	0	0	0	0	0	0	0	0	0	0	0	0	0	0	0	0	0	0	0	0	0	0	0	0	0	0	0	0	0	0	0	0	0	1	0	1	1	0	0	0
Ask_Har_11	ASK_HAR	ASK	HAR	E	0	1	0	1	0	1	1	0	0	1	0	1	0	0	0	1	1	0	1	0	1	1	0	1	0	0	1	1	0	0	1	0	0	1	1	0	0	1	0	0	0	1	1	0	0
Ask_Har_12	ASK_HAR	ASK	HAR	E	0	1	0	1	0	0	0	1	0	0	1	1	0	0	0	1	0	0	1	0	1	1	0	1	0	0	1	0	0	0	1	0	1	1	0	0	0	1	0	0	1	1	0	1	0
Ask_Har_13	ASK_HAR	ASK	HAR	E	0	0	0	0	0	0	0	0	0	0	0	1	0	0	0	1	0	0	0	0	0	1	0	1	0	1	1	0	0	0	1	1	0	1	0	0	0	0	0	1	0	0	0	0	0
Ask_Har_14	ASK_HAR	ASK	HAR	H	1	0	0	0	0	0	1	0	0	1	1	0	0	0	0	1	0	0	0	0	1	1	0	0	1	0	1	1	0	0	1	1	0	1	0	0	0	0	0	0	0	0	0	0	0
Ask_Har_15	ASK_HAR	ASK	HAR	H	1	0	0	0	0	0	0	1	0	0	0	1	0	0	0	1	0	0	0	0	0	0	0	1	0	0	1	0	0	0	1	1	0	1	0	0	0	1	0	1	0	0	1	1	0
Ask_Har_16	ASK_HAR	ASK	HAR	E	0	1	0	1	0	0	1	0	0	0	0	1	0	0	0	1	0	0	1	0	0	1	0	1	0	0	1	1	0	0	1	1	0	1	0	0	0	0	1	0	1	0	0	1	0
Ask_Har_17	ASK_HAR	ASK	HAR	H	1	0	0	0	0	0	0	1	1	0	0	1	0	0	0	1	0	0	0	0	0	1	0	1	0	0	1	0	0	0	1	1	0	1	1	0	0	1	0	1	1	0	0	0	0
Ask_Har_18	ASK_HAR	ASK	HAR	H	1	0	1	1	0	0	1	1	1	1	0	1	1	1	0	1	0	0	1	0	0	1	0	0	1	0	1	1	0	0	1	1	0	0	0	0	0	1	0	1	0	0	0	0	0
Ask_Har_19	ASK_HAR	ASK	HAR	E	0	0	1	1	0	0	0	1	0	1	0	1	0	0	0	0	0	0	1	0	0	0	0	1	0	0	1	1	1	0	1	1	0	1	1	0	0	1	0	1	0	0	1	0	0
Ask_Har_20	ASK_HAR	ASK	HAR	E	0	0	0	1	0	1	1	0	0	0	1	0	1	0	1	1	0	0	0	0	1	1	0	1	0	0	1	0	0	0	1	0	0	1	1	0	0	0	0	0	1	1	0	1	0
Ask_Har_21	ASK_HAR	ASK	HAR	H	1	1	0	1	0	0	0	0	0	0	0	1	0	0	0	0	0	0	0	0	0	0	0	1	0	0	1	0	0	0	0	1	0	1	0	0	0	0	0	0	1	0	0	1	0
Ask_Har_22	ASK_HAR	ASK	HAR	H	1	0	1	1	0	1	1	0	1	0	0	0	1	1	0	1	0	0	1	0	0	1	0	0	1	0	1	1	0	0	1	0	0	1	0	0	0	1	0	0	1	0	0	0	1
Ask_Har_23	ASK_HAR	ASK	HAR	H	1	0	1	1	0	0	1	0	0	0	0	0	0	1	0	0	0	0	0	0	0	0	0	1	0	0	1	0	0	0	1	1	0	1	0	0	1	0	1	1	0	0	0	0	0
Ask_Har_24	ASK_HAR	ASK	HAR	H	1	0	0	1	0	0	1	0	1	1	0	1	0	0	0	1	0	0	1	0	1	1	0	1	0	0	1	0	0	0	0	1	0	1	0	0	0	0	0	1	0	1	0	0	0
Ask_Har_25	ASK_HAR	ASK	HAR	T	2	1	1	0	0	1	1	1	1	0	0	0	0	1	0	1	1	1	0	0	1	1	1	1	1	0	1	0	1	0	1	1	0	1	0	1	0	0	0	0	1	1	1	0	0
Ask_Har_26	ASK_HAR	ASK	HAR	E	0	1	1	0	0	0	1	1	1	1	0	1	0	0	0	1	0	1	1	0	1	1	0	1	1	0	1	1	1	0	1	1	0	1	1	1	1	0	0	1	0	1	0	1	1
Ask_Har_27	ASK_HAR	ASK	HAR	T	2	0	0	1	0	1	0	0	0	0	0	1	0	0	0	1	0	0	0	0	0	1	0	0	0	0	1	0	0	1	0	0	0	1	0	1	1	0	0	1	0	0	0	0	1
Ask_Har_28	ASK_HAR	ASK	HAR	E	0	0	1	0	0	0	1	0	0	0	0	0	0	0	0	0	0	0	0	0	0	0	0	0	0	0	1	0	0	0	1	1	0	1	0	0	0	0	0	0	0	1	0	0	1
Ask_Har_29	ASK_HAR	ASK	HAR	H	1	0	0	0	0	0	0	0	0	0	0	0	0	0	0	1	1	0	0	0	0	0	0	0	0	0	1	0	0	0	1	1	0	1	0	1	0	0	0	0	1	1	1	0	0
Ask_Har_30	ASK_HAR	ASK	HAR	E	0	0	0	0	0	0	0	0	1	1	0	0	0	0	0	0	0	0	0	0	0	0	0	1	0	0	1	0	0	0	1	1	0	0	0	0	1	0	0	0	0	1	0	0	0
Ask_Ref_01	ASK_REF	ASK	REF	H	1	1	0	0	0	1	0	1	0	1	0	0	0	0	0	0	1	0	0	0	1	1	0	1	1	0	1	1	0	0	1	0	1	1	0	1	1	0	0	0	0	0	0	0	0
Ask_Ref_02	ASK_REF	ASK	REF	E	0	1	1	1	0	1	0	0	1	1	0	1	1	0	0	0	0	0	1	0	1	1	0	1	1	0	1	0	0	0	1	0	0	1	1	0	1	0	0	1	1	0	0	0	0
Ask_Ref_03	ASK_REF	ASK	REF	H	1	1	1	1	0	0	0	1	1	0	0	0	0	1	1	1	0	0	0	0	0	1	0	0	1	0	1	0	0	0	1	1	0	0	0	0	0	0	0	1	1	0	0	1	0
Ask_Ref_04	ASK_REF	ASK	REF	H	1	1	0	1	0	1	1	0	0	1	0	1	0	0	0	0	0	0	0	0	1	0	0	1	1	0	1	1	0	0	1	1	0	0	0	0	0	1	0	0	0	1	0	0	1
Ask_Ref_06	ASK_REF	ASK	REF	E	0	0	0	0	0	0	0	0	1	1	0	0	0	1	0	1	0	0	0	0	0	0	0	0	0	0	1	0	0	0	1	1	0	1	0	0	0	0	0	0	0	1	0	0	0
Ask_Ref_07	ASK_REF	ASK	REF	T	2	1	0	0	0	0	0	0	0	0	0	0	0	0	0	0	0	0	0	0	0	1	0	1	1	0	0	0	0	0	0	1	0	1	1	0	1	1	0	1	0	0	0	0	0
Ask_Ref_08	ASK_REF	ASK	REF	E	0	0	0	1	0	1	0	0	0	0	0	0	0	1	0	0	0	0	1	0	1	0	0	1	0	0	1	0	1	0	1	0	0	1	0	0	1	0	0	0	0	0	0	0	0
Ask_Ref_10	ASK_REF	ASK	REF	H	1	0	0	0	0	0	0	0	1	1	1	1	0	0	0	0	1	0	1	0	0	1	0	1	0	0	1	0	0	0	1	1	1	1	0	0	1	0	0	0	0	1	1	1	0
Ask_Ref_11	ASK_REF	ASK	REF	E	0	1	1	0	0	1	0	0	0	1	0	1	0	1	0	1	1	0	0	0	0	1	0	1	0	0	1	0	0	0	1	1	0	1	0	0	0	1	0	1	0	0	0	0	0
Ask_Ref_12	ASK_REF	ASK	REF	T	2	0	0	0	0	0	0	0	0	1	1	0	1	0	0	0	0	0	0	0	0	0	1	1	0	0	1	0	0	0	1	1	0	1	0	0	0	0	0	0	0	1	0	0	0
Ask_Ref_13	ASK_REF	ASK	REF	E	0	1	0	0	0	0	0	0	0	0	0	1	0	0	0	0	1	0	0	0	0	0	0	1	0	0	1	0	0	0	1	1	0	0	0	1	0	0	0	0	1	0	0	0	0
Ask_Ref_14	ASK_REF	ASK	REF	T	2	0	0	1	1	0	0	0	1	0	0	1	0	0	0	1	1	0	0	0	0	1	0	1	0	0	1	0	0	0	1	1	0	1	0	0	0	0	0	0	1	1	0	0	0
Ask_Ref_16	ASK_REF	ASK	REF	H	1	0	0	0	0	0	0	0	0	0	0	1	0	0	0	1	1	0	0	0	1	1	0	1	0	0	1	1	0	0	0	1	1	1	0	0	0	0	0	0	1	0	0	1	0
Ask_Ref_17	ASK_REF	ASK	REF	H	1	0	0	1	0	0	0	0	0	0	0	0	0	0	0	1	1	0	0	0	0	1	0	1	0	0	1	0	0	0	1	1	0	1	0	0	1	0	0	1	1	1	0	1	0
Ask_Ref_18	ASK_REF	ASK	REF	H	1	1	0	1	0	0	1	0	1	0	0	0	0	0	0	1	0	1	0	0	0	1	0	0	1	0	1	0	0	0	0	0	0	1	0	0	0	0	0	0	1	0	0	0	0
Ask_Ref_19	ASK_REF	ASK	REF	T	2	1	0	1	0	0	0	0	0	1	0	0	0	0	0	1	0	1	1	0	1	1	1	0	0	0	1	1	0	0	1	1	1	1	0	0	0	1	0	1	0	1	0	1	0
Ask_Ref_22	ASK_REF	ASK	REF	H	1	0	1	1	0	1	1	1	0	0	0	0	0	0	0	1	0	0	0	0	0	1	0	1	0	0	1	1	0	0	1	1	0	1	0	0	0	0	0	1	0	1	1	1	1
Ask_Ref_23	ASK_REF	ASK	REF	H	1	0	0	1	0	0	0	1	0	0	0	1	0	0	0	0	0	0	0	0	0	0	0	0	1	0	1	0	0	0	1	0	0	1	0	0	0	0	0	0	1	0	0	0	0
Ask_Ref_24	ASK_REF	ASK	REF	H	1	0	0	0	0	0	0	0	0	0	0	1	0	1	0	1	0	0	0	0	0	1	0	0	0	0	1	0	0	0	1	1	0	1	0	0	0	0	0	1	0	1	0	1	0
Ask_Ref_25	ASK_REF	ASK	REF	T	2	0	0	0	0	0	0	0	1	0	0	1	0	0	0	1	0	0	0	0	0	0	0	0	0	0	1	0	0	0	1	1	0	1	0	0	0	0	0	0	0	1	0	1	0
Ask_Ref_26	ASK_REF	ASK	REF	H	1	1	0	1	0	0	1	1	0	0	0	1	0	0	0	1	0	0	0	1	1	1	0	1	0	0	1	0	0	0	1	1	0	1	0	0	0	0	0	0	1	0	0	0	0
Ask_Ref_27	ASK_REF	ASK	REF	H	1	1	1	1	0	1	0	0	1	0	0	1	0	0	0	1	0	0	0	0	0	1	0	0	0	0	1	0	0	1	1	1	0	0	0	0	0	0	0	0	0	0	0	0	0
Ask_Ref_28	ASK_REF	ASK	REF	H	1	1	0	1	0	1	1	0	1	0	0	1	0	0	0	1	1	0	0	0	1	0	0	1	0	0	1	0	0	0	1	1	0	1	0	0	0	0	0	0	1	1	1	0	0
Ask_Ref_29	ASK_REF	ASK	REF	E	0	1	0	1	0	1	1	0	0	0	0	1	0	0	1	1	0	0	0	0	1	1	0	1	1	0	1	0	0	0	1	0	0	1	0	0	0	0	0	0	1	0	0	1	0
Ask_Ref_30	ASK_REF	ASK	REF	H	1	1	0	0	0	0	0	0	0	0	0	0	0	1	1	0	0	0	0	0	0	0	0	1	0	0	1	0	0	0	1	1	0	0	0	0	0	0	0	1	0	1	0	0	1
Ask_STP_01	ASK_STP	ASK	STP	H	1	1	1	1	0	0	1	1	0	1	0	1	0	0	1	0	0	1	0	0	0	1	0	0	1	1	1	0	0	1	1	1	0	1	0	0	0	1	1	1	0	1	0	1	1
Ask_STP_02	ASK_STP	ASK	STP	E	0	1	0	0	1	0	0	0	0	0	0	0	0	0	0	1	0	0	0	0	0	1	0	1	1	0	1	0	0	0	0	0	0	0	0	0	0	0	0	0	0	0	1	0	0
Ask_STP_03	ASK_STP	ASK	STP	E	0	0	0	0	0	1	0	1	0	0	0	0	0	1	0	1	0	0	0	0	0	1	0	1	0	0	1	0	0	0	1	0	0	1	1	0	0	0	0	0	0	1	0	1	0
Ask_STP_05	ASK_STP	ASK	STP	E	0	1	0	0	0	0	1	0	0	0	0	1	0	0	0	0	0	0	0	0	1	1	0	0	0	0	0	0	0	0	1	0	0	1	1	0	0	0	0	0	0	0	0	0	0
Ask_STP_06	ASK_STP	ASK	STP	T	2	1	0	0	1	1	0	0	0	1	1	1	0	1	0	1	1	1	0	0	1	0	0	1	1	0	1	0	0	0	1	0	1	1	0	0	1	0	0	1	0	0	0	0	1
Ask_STP_07	ASK_STP	ASK	STP	H	1	0	1	1	0	1	0	0	1	1	0	1	0	0	0	1	0	0	1	0	0	0	0	0	0	0	1	0	0	0	1	1	0	1	1	0	0	0	0	1	1	1	0	1	0
Ask_STP_09	ASK_STP	ASK	STP	T	2	1	0	1	0	0	0	0	0	0	0	1	0	0	0	1	0	0	0	0	0	0	0	1	0	0	1	0	0	0	1	0	0	1	0	0	0	1	0	1	0	0	1	1	0
Ask_STP_10	ASK_STP	ASK	STP	T	2	1	0	1	0	1	0	1	0	1	0	1	0	0	0	1	0	0	0	0	0	1	0	1	0	0	1	1	0	0	1	0	1	1	0	0	0	0	0	0	1	1	0	0	0
Ask_STP_11	ASK_STP	ASK	STP	E	0	1	0	1	0	1	0	0	1	0	1	1	0	0	0	0	1	0	1	0	0	1	1	1	1	1	1	1	0	1	1	1	0	1	0	1	0	0	0	0	0	1	0	1	0
Ask_STP_12	ASK_STP	ASK	STP	H	1	1	0	1	0	0	1	1	1	0	1	1	1	1	0	0	1	0	0	0	1	1	1	0	1	0	1	1	0	0	1	1	0	1	0	1	0	1	0	1	1	1	0	1	1
Ask_STP_13	ASK_STP	ASK	STP	E	0	0	1	1	0	1	0	0	0	0	1	1	0	1	0	1	0	0	1	0	1	1	0	1	0	0	1	0	0	1	1	1	1	0	0	0	1	0	0	0	1	1	0	0	0
Ask_STP_14	ASK_STP	ASK	STP	H	1	1	0	1	0	1	1	0	0	1	0	1	0	1	0	1	0	0	0	0	0	1	0	0	1	0	1	0	1	0	1	1	1	1	1	0	1	0	0	0	1	1	1	1	0
Ask_STP_15	ASK_STP	ASK	STP	H	1	1	0	1	0	0	0	0	0	0	0	1	0	0	0	0	0	0	0	0	0	1	1	0	0	0	1	0	0	0	1	0	0	1	0	0	1	0	1	0	1	1	0	0	0
Ask_STP_16	ASK_STP	ASK	STP	E	0	1	0	1	0	0	1	0	0	0	0	1	0	0	0	0	0	0	1	0	1	0	0	0	1	0	1	0	0	0	1	1	0	1	1	0	0	0	0	0	0	0	0	0	0
Ask_STP_17	ASK_STP	ASK	STP	E	0	0	0	0	0	0	0	0	0	0	1	1	0	0	0	1	0	0	0	0	0	0	0	1	0	0	1	0	1	0	1	1	0	1	0	0	0	0	0	1	0	1	0	1	0
Ask_STP_18	ASK_STP	ASK	STP	T	2	0	0	0	0	0	0	0	0	0	0	1	0	0	0	1	0	0	1	0	0	1	1	1	0	0	1	0	0	0	1	1	0	1	0	0	0	0	0	0	1	1	0	0	0
Ask_STP_19	ASK_STP	ASK	STP	T	2	1	1	1	0	1	0	0	1	0	0	1	0	0	0	1	0	0	0	0	1	1	0	1	0	0	1	0	0	0	1	1	0	1	0	0	0	0	0	0	1	1	0	0	1
Ask_STP_21	ASK_STP	ASK	STP	H	1	0	0	0	0	0	0	0	1	0	0	1	0	0	0	0	0	0	0	0	0	0	0	0	0	0	1	1	0	0	1	1	0	1	0	0	0	0	0	0	1	0	1	0	1
Ask_STP_23	ASK_STP	ASK	STP	NA	NA	1	1	1	0	1	0	0	0	0	1	1	0	0	0	1	0	0	0	0	0	1	1	1	1	0	1	0	0	0	0	0	1	1	0	0	0	0	0	1	0	1	1	1	0
Ask_STP_24	ASK_STP	ASK	STP	H	1	1	0	0	1	0	0	0	0	0	1	1	0	1	0	1	0	0	0	0	0	1	0	1	1	0	1	0	0	0	1	1	0	1	0	0	0	0	0	0	1	0	1	1	0
Ask_STP_25	ASK_STP	ASK	STP	T	2	1	0	1	0	1	1	0	1	1	0	1	0	1	0	1	0	0	1	0	0	1	0	1	1	0	1	0	1	0	1	1	1	1	0	0	0	1	0	0	1	1	0	0	0
Ask_STP_26	ASK_STP	ASK	STP	T	2	1	1	1	0	0	0	1	0	1	0	0	0	0	0	1	0	0	0	0	0	1	0	1	1	0	1	0	0	0	1	0	0	0	0	0	0	0	0	0	0	0	0	0	0
Ask_STP_27	ASK_STP	ASK	STP	T	2	0	1	0	0	0	1	1	1	0	0	1	1	0	0	0	0	1	1	0	1	1	1	0	1	1	1	0	0	0	1	0	1	1	0	0	1	0	0	0	0	1	0	1	1
Ask_STP_28	ASK_STP	ASK	STP	H	1	0	0	1	0	0	0	0	0	1	0	0	0	0	0	0	0	0	0	0	1	1	0	1	1	0	1	0	1	0	1	1	0	0	0	0	1	1	0	0	0	0	0	0	0
Ask_STP_30	ASK_STP	ASK	STP	T	2	0	0	1	0	1	0	0	0	0	0	0	0	0	0	1	0	0	0	0	0	0	0	0	0	0	1	0	0	0	1	1	0	1	0	0	0	0	0	1	0	0	0	0	1
TVA_Har_01	TVA_HAR	TVA	HAR	H	1	1	0	0	0	0	1	1	0	1	0	0	0	0	0	1	0	0	1	0	0	1	0	0	0	0	1	0	0	0	1	0	1	1	0	0	0	0	0	0	0	1	1	1	0
TVA_Har_04	TVA_HAR	TVA	HAR	E	0	1	1	0	1	0	1	1	0	0	0	0	0	0	1	0	0	0	1	0	1	1	1	0	1	0	1	0	1	0	0	0	1	1	1	0	0	0	0	0	0	1	0	1	0
TVA_Har_06	TVA_HAR	TVA	HAR	H	1	0	0	1	0	0	1	0	1	0	0	1	0	0	0	1	0	0	0	0	0	0	0	1	0	0	1	0	0	0	1	1	1	0	0	0	0	0	0	0	1	1	1	0	0
TVA_Har_07	TVA_HAR	TVA	HAR	T	2	1	0	1	1	1	1	0	1	1	0	0	0	0	0	1	0	0	0	1	0	1	0	0	1	1	1	1	0	0	1	1	0	1	0	0	0	1	0	1	0	1	1	0	1
TVA_Har_08	TVA_HAR	TVA	HAR	NA	NA	0	0	1	0	1	1	0	1	1	0	1	0	0	0	0	1	0	0	0	0	0	0	0	0	0	1	0	0	0	1	1	0	1	0	0	0	0	0	1	0	0	0	1	0
TVA_Har_09	TVA_HAR	TVA	HAR	H	1	0	0	1	0	0	0	0	0	1	0	1	0	0	0	1	0	0	0	0	0	1	0	0	0	0	1	0	0	0	1	0	0	1	0	0	0	0	0	0	0	1	0	1	0
TVA_Har_10	TVA_HAR	TVA	HAR	E	0	1	0	1	0	1	1	1	0	0	0	1	0	0	0	1	0	1	0	1	1	0	0	0	1	0	1	0	0	0	1	0	1	1	0	0	0	1	0	1	1	1	0	1	0
TVA_Har_11	TVA_HAR	TVA	HAR	H	1	1	0	0	0	0	0	0	1	1	0	1	0	0	0	0	0	0	1	0	0	1	0	0	0	0	1	1	1	0	1	0	1	1	0	0	0	0	0	1	0	1	0	1	0
TVA_Har_12	TVA_HAR	TVA	HAR	H	1	0	0	0	0	0	0	0	1	1	0	1	0	0	0	0	0	0	0	0	0	0	0	1	0	0	1	0	0	0	1	1	0	1	0	0	0	0	0	0	1	1	0	0	0
TVA_Har_13	TVA_HAR	TVA	HAR	E	0	0	0	1	0	1	0	1	0	0	1	0	0	0	0	1	0	0	1	0	0	0	0	0	1	0	1	0	0	0	1	1	0	1	0	0	1	0	0	1	1	0	0	0	0
TVA_Har_14	TVA_HAR	TVA	HAR	E	0	0	0	0	0	1	0	0	1	0	0	1	0	0	0	1	0	0	1	0	0	0	0	1	0	0	1	0	0	0	1	1	0	0	0	0	0	0	0	0	1	1	0	0	0
TVA_Har_15	TVA_HAR	TVA	HAR	E	0	1	1	1	0	0	1	1	1	1	0	1	0	0	0	0	1	1	0	0	0	0	0	1	1	0	1	0	0	0	1	1	0	1	1	0	1	0	0	1	0	1	0	0	0
TVA_Har_16	TVA_HAR	TVA	HAR	H	1	0	1	1	0	1	0	0	0	1	1	1	0	1	0	1	0	0	1	0	0	1	0	0	1	0	1	0	1	0	1	1	0	1	0	0	0	0	0	0	0	0	0	0	0
TVA_Har_17	TVA_HAR	TVA	HAR	H	1	1	0	0	0	1	0	0	0	0	0	1	0	0	0	1	0	0	0	0	1	0	0	1	0	0	1	0	0	0	1	1	0	1	0	0	0	0	0	1	0	1	0	0	0
TVA_Har_18	TVA_HAR	TVA	HAR	H	1	0	0	1	0	0	0	0	0	0	0	1	0	0	0	1	0	0	0	0	0	1	0	0	0	0	1	0	0	0	1	1	0	1	0	0	0	0	0	0	0	1	0	1	0
TVA_Har_19	TVA_HAR	TVA	HAR	E	0	1	0	1	0	1	0	0	0	0	1	1	0	0	0	1	0	0	0	0	0	0	0	1	1	0	1	0	0	0	1	1	0	0	1	0	0	0	0	1	0	0	1	0	0
TVA_Har_20	TVA_HAR	TVA	HAR	H	1	1	1	1	0	1	0	1	0	1	0	1	0	0	0	1	1	0	0	1	0	1	0	0	1	1	1	0	1	0	1	1	0	1	1	1	0	1	0	1	0	0	0	0	0
TVA_Har_21	TVA_HAR	TVA	HAR	H	1	1	1	1	0	0	0	0	0	1	0	1	0	0	0	0	0	0	0	0	0	0	0	1	0	0	1	0	0	0	1	0	1	1	1	0	0	1	0	0	0	0	1	1	0
TVA_Har_22	TVA_HAR	TVA	HAR	H	1	1	1	0	0	0	1	1	0	0	0	0	0	1	0	1	0	1	0	0	0	0	1	0	0	0	1	0	0	0	1	1	0	1	0	0	0	0	0	1	0	1	1	0	0
TVA_Har_23	TVA_HAR	TVA	HAR	E	0	0	1	1	0	0	0	0	1	0	0	0	0	0	0	0	0	0	0	0	0	0	0	1	0	0	1	0	0	0	0	1	0	1	0	0	0	0	0	0	0	0	0	0	0
TVA_Har_25	TVA_HAR	TVA	HAR	E	0	0	1	1	0	0	1	1	0	0	0	1	0	0	0	1	0	0	0	0	0	0	0	1	1	0	1	0	0	0	1	1	0	1	0	0	0	1	0	1	1	1	1	1	0
TVA_Har_27	TVA_HAR	TVA	HAR	E	0	1	0	0	0	0	0	0	1	0	1	1	0	0	0	0	0	0	1	0	0	0	0	1	0	0	1	0	0	0	0	1	0	0	0	0	0	0	0	0	1	0	0	1	0
TVA_Har_28	TVA_HAR	TVA	HAR	H	1	1	0	1	0	0	0	0	1	0	0	1	0	0	0	1	1	0	0	0	0	1	0	0	0	1	1	0	0	0	1	1	0	1	1	0	0	0	0	1	1	1	1	1	0
TVA_Har_29	TVA_HAR	TVA	HAR	H	1	1	0	1	0	0	1	0	0	0	1	0	0	0	0	1	0	0	0	0	0	0	1	1	0	0	1	0	0	0	1	1	0	0	0	0	0	1	0	0	0	0	0	0	0
TVA_Har_30	TVA_HAR	TVA	HAR	H	1	1	0	0	0	0	0	1	0	0	0	1	0	0	0	1	1	0	1	0	0	0	0	1	0	0	1	0	0	0	1	1	0	1	0	0	0	0	0	0	0	1	1	0	0
TVA_Ref_01	TVA_REF	TVA	REF	T	2	0	0	1	1	0	0	0	0	1	0	1	0	0	0	1	1	0	0	0	0	1	0	0	1	0	1	0	0	0	1	1	0	1	0	0	0	1	0	0	1	1	0	0	0
TVA_Ref_02	TVA_REF	TVA	REF	E	0	0	1	1	0	0	0	0	0	0	0	1	0	0	0	1	0	0	0	0	0	1	0	1	0	0	1	0	0	0	1	0	0	0	0	0	0	0	0	1	0	0	0	1	0
TVA_Ref_03	TVA_REF	TVA	REF	E	0	0	0	1	0	0	0	0	1	1	0	1	0	0	0	0	1	0	1	0	0	0	0	0	0	0	1	0	0	0	1	0	0	1	0	0	1	0	0	0	1	0	0	0	0
TVA_Ref_04	TVA_REF	TVA	REF	H	1	0	0	0	0	0	0	0	1	0	0	0	0	0	0	1	1	0	0	0	0	1	0	1	0	0	1	0	0	0	1	1	0	0	0	0	1	0	0	0	0	0	0	0	0
TVA_Ref_05	TVA_REF	TVA	REF	E	0	0	0	1	0	1	0	1	0	1	0	1	0	0	0	1	0	0	0	0	0	0	0	0	1	0	1	0	0	0	1	1	0	1	0	0	0	0	0	0	1	0	0	0	0
TVA_Ref_06	TVA_REF	TVA	REF	H	1	0	0	1	0	0	1	1	0	0	0	0	0	0	0	0	0	0	0	0	0	0	0	1	0	0	1	0	1	0	1	0	0	1	0	0	0	0	0	0	0	0	0	1	0
TVA_Ref_07	TVA_REF	TVA	REF	T	2	0	0	0	0	1	1	0	0	0	1	1	0	0	0	1	0	1	0	0	0	0	0	1	0	0	1	0	0	0	1	1	0	1	0	0	1	0	0	0	0	0	1	0	0
TVA_Ref_08	TVA_REF	TVA	REF	E	0	1	0	1	0	1	0	0	0	0	0	1	0	0	0	0	0	0	0	1	0	0	0	1	0	0	1	1	0	0	1	1	0	0	0	0	0	0	0	0	0	0	0	1	0
TVA_Ref_09	TVA_REF	TVA	REF	NA	NA	1	1	1	0	0	0	0	0	1	0	0	0	0	0	1	0	0	0	0	0	0	0	1	0	0	1	0	0	0	1	0	0	1	0	0	0	0	0	0	0	0	0	0	0
TVA_Ref_10	TVA_REF	TVA	REF	H	1	0	0	0	0	0	1	0	0	0	0	0	0	0	0	1	0	0	0	0	0	1	0	1	0	0	1	1	0	0	1	1	0	1	0	0	0	0	0	0	1	1	0	0	0
TVA_Ref_11	TVA_REF	TVA	REF	E	0	0	1	0	0	0	0	0	1	0	0	1	0	0	0	0	0	0	1	0	0	1	0	1	0	0	1	0	0	0	1	1	0	1	0	0	0	0	0	0	0	1	0	0	0
TVA_Ref_12	TVA_REF	TVA	REF	H	1	0	0	0	0	1	0	1	0	0	0	1	0	0	0	1	0	0	0	0	0	1	0	0	1	0	1	0	1	0	0	1	0	1	1	0	1	1	0	0	0	0	0	0	0
TVA_Ref_13	TVA_REF	TVA	REF	E	0	1	0	1	0	1	0	1	1	0	0	1	1	1	0	1	0	0	0	1	0	1	0	0	1	1	1	0	0	0	1	1	0	1	0	0	0	0	0	0	1	1	0	1	0
TVA_Ref_14	TVA_REF	TVA	REF	H	1	1	1	1	0	0	1	0	0	0	0	1	0	1	0	0	1	1	0	0	0	1	0	0	1	0	1	1	0	0	1	1	0	1	0	0	1	1	0	1	1	1	0	1	0
TVA_Ref_15	TVA_REF	TVA	REF	H	1	1	0	0	0	0	0	0	0	0	0	0	1	0	1	1	1	0	0	0	0	0	0	1	0	0	1	0	1	0	1	0	1	1	0	0	1	0	1	0	0	1	0	0	0
TVA_Ref_16	TVA_REF	TVA	REF	E	0	1	0	1	0	0	0	0	1	1	0	1	0	0	0	0	0	0	0	0	0	1	0	1	0	0	1	1	0	0	1	1	0	1	0	0	0	0	0	1	0	1	1	0	0
TVA_Ref_17	TVA_REF	TVA	REF	T	2	1	0	1	0	1	0	0	0	0	1	0	0	0	0	1	0	0	0	1	0	1	0	1	1	0	1	0	0	0	1	1	0	0	0	0	0	0	0	0	1	1	0	0	0
TVA_Ref_18	TVA_REF	TVA	REF	H	1	1	1	1	0	0	0	1	1	1	0	0	0	0	0	1	0	0	0	0	0	0	1	1	0	0	1	0	1	0	1	1	0	0	0	0	0	0	0	0	1	1	0	1	1
TVA_Ref_20	TVA_REF	TVA	REF	H	1	0	0	1	1	1	0	0	0	0	0	0	0	1	0	1	0	0	0	0	1	1	0	0	0	0	1	0	0	0	0	1	0	0	0	0	0	0	0	0	0	0	0	0	0
TVA_Ref_21	TVA_REF	TVA	REF	T	2	0	0	0	0	1	0	1	0	0	0	1	0	0	0	1	1	0	1	0	0	1	0	1	0	0	1	0	0	0	1	1	0	1	0	0	1	1	0	1	0	0	1	1	0
TVA_Ref_22	TVA_REF	TVA	REF	H	1	1	0	1	0	0	0	0	0	0	0	0	0	0	0	0	0	0	0	0	0	0	0	0	0	0	1	0	0	0	1	1	0	0	0	0	0	0	0	0	1	1	0	0	1
TVA_Ref_23	TVA_REF	TVA	REF	T	2	0	1	1	0	0	1	0	0	0	0	1	0	1	0	1	1	0	0	0	0	1	1	1	0	0	1	0	0	0	1	1	0	1	0	0	0	0	0	0	1	1	0	1	0
TVA_Ref_24	TVA_REF	TVA	REF	T	2	0	0	0	0	0	0	0	1	0	0	1	0	0	1	1	0	0	0	0	0	0	0	1	0	0	1	1	0	0	1	1	0	1	0	0	0	0	0	0	0	1	1	0	0
TVA_Ref_25	TVA_REF	TVA	REF	H	1	0	0	1	0	0	0	0	1	0	0	1	0	0	0	1	1	0	0	0	0	0	1	1	0	0	1	0	0	1	1	1	0	1	0	0	0	0	0	1	1	0	1	0	0
TVA_Ref_26	TVA_REF	TVA	REF	H	1	0	0	1	0	0	0	0	0	0	0	1	0	0	0	1	1	0	0	1	1	1	0	1	0	0	1	0	0	0	1	1	0	1	1	0	1	1	0	1	1	1	0	0	0
TVA_Ref_29	TVA_REF	TVA	REF	H	1	1	0	0	0	0	0	0	0	1	1	1	0	0	0	0	0	0	0	0	0	1	0	0	0	0	1	1	0	0	1	1	1	1	0	0	1	1	0	1	1	0	1	0	0
TVA_Ref_30	TVA_REF	TVA	REF	E	0	0	0	0	0	0	0	0	0	0	0	1	1	0	0	1	0	0	0	0	0	1	0	0	1	0	1	0	1	0	1	1	0	1	0	0	0	1	0	0	0	1	0	0	1
TVA_STP_01	TVA_STP	TVA	STP	H	1	0	1	1	0	1	0	1	1	0	0	1	1	0	0	1	0	0	1	1	0	1	0	0	0	0	1	0	0	0	1	0	0	1	1	0	0	0	0	1	0	1	0	0	0
TVA_STP_02	TVA_STP	TVA	STP	H	1	1	0	0	0	1	1	1	0	0	0	1	0	0	0	0	0	0	0	1	0	1	0	1	1	0	1	0	0	0	0	1	0	0	1	0	0	0	0	0	0	0	0	1	0
TVA_STP_03	TVA_STP	TVA	STP	E	0	0	0	0	0	0	0	1	1	0	1	0	0	0	0	1	1	0	0	0	1	0	0	0	1	0	1	0	0	0	1	0	0	1	1	0	0	0	0	0	0	0	0	1	0
TVA_STP_04	TVA_STP	TVA	STP	T	2	0	0	0	0	1	0	0	0	0	0	1	0	0	1	1	0	0	0	0	0	0	0	1	0	0	1	0	0	0	1	0	1	1	0	0	0	1	0	1	0	0	0	0	1
TVA_STP_05	TVA_STP	TVA	STP	E	0	1	0	1	1	1	0	1	1	1	0	0	1	0	0	1	0	1	0	1	0	1	0	0	1	0	1	1	0	0	1	1	1	1	1	0	0	1	0	1	0	1	0	1	0
TVA_STP_06	TVA_STP	TVA	STP	H	1	0	0	0	0	0	0	0	1	0	0	0	0	0	0	0	1	0	0	0	1	1	0	1	1	1	1	1	1	0	0	0	0	0	0	0	1	1	0	0	1	1	0	0	0
TVA_STP_10	TVA_STP	TVA	STP	E	0	0	0	0	1	1	1	1	0	0	0	0	0	0	0	1	0	1	0	0	0	1	0	1	0	0	1	0	0	0	1	0	1	1	0	0	0	0	1	0	0	1	0	0	0
TVA_STP_12	TVA_STP	TVA	STP	H	1	0	0	1	0	1	0	0	0	0	0	1	0	0	0	0	0	0	0	0	1	0	0	1	0	0	1	0	0	0	1	1	1	1	0	0	0	1	0	0	0	1	0	1	0
TVA_STP_13	TVA_STP	TVA	STP	H	1	1	0	1	0	0	0	1	0	0	0	1	0	0	0	1	0	0	0	0	1	0	0	0	1	0	1	0	0	0	1	1	0	1	1	0	0	1	0	0	1	1	1	0	0
TVA_STP_14	TVA_STP	TVA	STP	H	1	0	0	1	0	0	0	0	0	1	0	1	0	0	0	1	0	0	0	0	1	1	0	1	0	0	1	0	0	0	1	1	0	1	0	0	1	0	0	0	1	1	0	1	0
TVA_STP_15	TVA_STP	TVA	STP	H	1	1	0	1	0	1	0	0	1	1	0	1	1	0	0	1	0	0	0	1	0	1	0	1	1	0	1	1	1	0	1	1	0	1	0	0	0	0	0	1	1	1	0	1	0
TVA_STP_16	TVA_STP	TVA	STP	H	1	0	0	0	0	1	0	0	1	0	0	1	0	0	1	1	0	0	0	0	0	1	0	1	0	0	1	0	0	0	1	1	0	1	0	0	0	0	0	1	1	1	0	0	0
TVA_STP_17	TVA_STP	TVA	STP	E	0	0	1	1	0	1	0	1	0	0	0	1	0	0	0	0	0	0	0	0	0	1	0	1	1	0	1	0	1	0	1	0	0	1	1	0	0	0	0	0	1	1	0	0	0
TVA_STP_19	TVA_STP	TVA	STP	E	0	0	1	1	0	0	0	0	1	0	0	1	1	0	0	0	0	1	1	0	1	0	0	1	0	0	1	1	0	0	1	1	0	1	0	0	1	0	0	1	1	1	0	0	0
TVA_STP_20	TVA_STP	TVA	STP	T	2	0	1	1	0	0	0	1	0	1	0	1	0	1	0	1	1	0	0	0	0	1	0	1	0	1	1	1	1	0	1	0	0	1	0	0	1	0	0	0	0	0	0	0	0
TVA_STP_21	TVA_STP	TVA	STP	H	1	1	0	1	0	0	1	0	1	1	0	1	0	0	0	1	1	0	0	0	1	1	1	0	1	0	1	0	0	0	1	1	0	1	1	0	1	0	0	0	0	1	0	1	1
TVA_STP_22	TVA_STP	TVA	STP	E	0	0	0	0	0	1	1	0	0	1	0	1	0	0	0	1	0	0	0	0	0	1	0	0	1	0	1	0	0	0	1	0	0	0	0	0	0	0	0	0	0	0	0	0	0
TVA_STP_23	TVA_STP	TVA	STP	H	1	1	1	1	0	1	0	1	1	1	0	1	0	0	0	1	0	0	0	1	0	1	0	0	1	0	1	1	0	1	1	1	0	1	0	0	0	0	0	1	1	1	0	0	0
TVA_STP_24	TVA_STP	TVA	STP	H	1	0	0	0	0	1	1	0	0	0	1	0	0	0	0	1	0	0	0	0	0	0	0	1	0	0	1	0	0	0	1	0	0	0	0	0	0	0	0	0	0	1	0	0	0
TVA_STP_25	TVA_STP	TVA	STP	E	0	1	0	0	0	0	0	0	0	0	0	0	0	0	0	0	0	0	0	0	0	0	0	0	0	0	1	0	0	0	0	0	0	0	0	0	0	0	0	0	0	1	0	0	1
TVA_STP_27	TVA_STP	TVA	STP	H	1	1	1	1	0	1	0	0	1	0	0	1	0	0	0	1	0	1	0	0	0	1	0	0	1	0	1	0	0	0	1	1	0	1	1	0	1	0	0	1	0	1	1	1	0
TVA_STP_28	TVA_STP	TVA	STP	H	1	1	0	0	0	1	0	0	1	0	0	1	0	0	0	0	1	0	0	0	0	0	0	1	1	0	1	0	0	0	1	1	0	1	1	0	1	0	0	0	1	1	1	1	0
TVA_STP_29	TVA_STP	TVA	STP	H	1	1	0	1	0	0	0	0	0	0	0	1	0	0	1	1	0	0	0	0	0	1	0	1	0	0	1	0	0	0	1	1	0	1	0	0	0	1	0	1	1	1	1	0	0
TVA_STP_30	TVA_STP	TVA	STP	E	0	0	0	0	0	0	0	0	0	0	0	0	0	0	0	1	0	0	0	0	0	0	0	1	0	0	1	0	0	0	1	1	1	1	0	1	0	1	1	0	1	1	0	1	0
Kar_Har_02	KAR_HAR	KAR	HAR	E	0	0	0	1	0	0	0	0	0	0	0	0	0	0	0	1	0	0	0	0	0	0	0	1	0	0	1	0	0	0	1	1	0	1	0	0	0	0	0	1	0	1	0	0	0
Kar_Har_03	KAR_HAR	KAR	HAR	NA	NA	0	0	0	0	0	1	1	1	1	0	0	0	0	0	1	0	0	0	0	0	0	0	0	0	0	1	0	0	0	1	1	0	0	0	0	0	0	1	0	1	1	0	0	1
Kar_Har_04	KAR_HAR	KAR	HAR	E	0	1	0	1	0	0	1	1	0	0	1	1	0	0	0	1	0	0	0	0	0	1	0	1	1	0	1	0	0	1	1	0	1	1	0	0	0	0	0	0	1	1	0	0	0
Kar_Har_10	KAR_HAR	KAR	HAR	E	0	1	0	0	0	0	0	0	0	0	0	0	0	0	0	0	0	0	0	0	0	0	0	1	0	0	1	0	0	0	0	0	0	1	0	0	0	0	0	0	0	0	1	0	0
Kar_Har_11	KAR_HAR	KAR	HAR	H	1	1	1	1	0	0	1	1	0	0	0	0	1	0	0	0	0	0	0	0	0	1	0	0	1	0	1	0	0	0	1	0	0	1	0	0	0	0	0	0	0	0	0	0	0
Kar_Har_12	KAR_HAR	KAR	HAR	T	2	1	1	1	0	0	1	0	0	0	1	0	0	1	0	1	0	0	0	0	1	1	0	1	1	0	1	0	1	0	1	1	0	1	0	0	1	0	0	0	0	0	0	1	0
Kar_Har_13	KAR_HAR	KAR	HAR	E	0	0	0	0	0	0	1	0	0	0	0	0	0	0	0	1	0	0	0	0	1	1	0	0	1	0	1	0	0	0	0	0	0	1	0	0	1	0	0	0	0	0	0	0	0
Kar_Har_14	KAR_HAR	KAR	HAR	H	1	1	1	1	0	0	1	0	1	0	1	1	1	0	1	0	0	1	0	0	0	0	0	0	1	0	1	0	1	0	1	0	0	0	1	0	1	0	0	0	0	1	0	0	0
Kar_Har_15	KAR_HAR	KAR	HAR	H	1	0	0	1	0	0	1	0	1	0	0	0	1	0	0	1	0	0	0	0	0	0	0	1	1	0	1	0	0	0	0	0	0	1	0	0	1	0	0	0	0	0	0	0	0
Kar_Har_16	KAR_HAR	KAR	HAR	E	0	1	0	0	0	0	0	0	1	1	0	1	0	0	0	1	0	0	1	0	0	1	0	0	1	0	1	1	0	0	1	1	0	1	0	0	0	0	0	1	1	1	1	0	0
Kar_Har_17	KAR_HAR	KAR	HAR	H	1	1	1	1	0	0	1	1	0	1	0	0	0	0	0	0	0	0	0	0	0	0	0	1	1	1	1	0	0	0	1	0	0	1	0	1	0	0	0	0	1	1	0	0	0
Kar_Har_18	KAR_HAR	KAR	HAR	E	0	0	1	1	0	1	0	1	1	0	0	1	0	1	0	1	0	1	0	0	1	0	0	0	1	1	1	1	1	0	1	1	1	1	1	0	1	0	0	1	0	1	1	0	1
Kar_Har_19	KAR_HAR	KAR	HAR	E	0	0	1	1	0	0	0	1	1	1	1	1	0	0	0	1	0	1	0	1	0	0	0	1	1	0	1	0	0	0	0	0	0	1	0	1	1	0	0	0	0	1	0	0	0
Kar_Har_20	KAR_HAR	KAR	HAR	H	1	0	1	1	0	1	0	0	1	0	1	1	0	0	1	1	1	0	1	0	1	1	0	1	1	0	1	0	0	0	1	1	0	1	0	0	1	1	0	0	1	1	0	0	0
Kar_Har_21	KAR_HAR	KAR	HAR	H	1	1	0	0	1	1	0	1	0	1	0	1	0	0	0	1	0	1	0	0	0	1	0	1	0	0	1	0	0	0	1	1	1	1	0	0	0	1	0	0	1	1	0	0	0
Kar_Har_22	KAR_HAR	KAR	HAR	T	2	1	0	1	0	0	1	0	0	1	0	1	0	0	0	1	1	0	1	0	0	1	0	1	0	1	1	0	0	1	1	1	0	1	0	1	0	0	0	1	1	0	0	0	0
Kar_Har_23	KAR_HAR	KAR	HAR	E	0	0	0	0	0	1	0	0	0	0	1	1	0	0	0	1	1	0	1	1	1	1	0	1	0	1	1	0	0	0	1	1	0	1	0	0	1	0	0	0	1	1	1	0	0
Kar_Har_24	KAR_HAR	KAR	HAR	H	1	0	0	0	0	0	0	0	0	0	0	0	0	0	0	1	0	0	0	0	0	0	0	0	0	0	1	0	0	0	1	1	0	0	0	0	0	0	0	0	0	1	0	0	0
Kar_Har_25	KAR_HAR	KAR	HAR	T	2	0	0	0	0	0	0	0	1	0	0	0	0	0	0	0	0	0	0	0	0	1	0	0	1	0	1	0	0	0	0	0	0	1	0	0	0	0	0	0	0	0	0	0	0
Kar_Har_26	KAR_HAR	KAR	HAR	E	0	1	1	1	0	0	1	0	1	1	0	1	0	1	0	1	0	0	1	0	1	0	0	0	1	0	1	0	0	0	1	1	0	1	0	0	1	1	0	0	0	0	0	1	1
Kar_Har_27	KAR_HAR	KAR	HAR	H	1	0	0	0	0	0	0	0	0	1	0	1	0	0	0	0	0	0	0	0	1	1	0	1	0	0	1	0	0	0	1	1	0	1	0	0	0	0	0	0	0	0	1	0	0
Kar_Har_28	KAR_HAR	KAR	HAR	T	2	0	0	1	0	0	0	1	0	1	0	0	0	1	0	1	0	0	0	0	1	1	0	0	0	0	1	0	1	0	0	0	0	1	0	0	0	1	0	0	0	1	0	0	0
Kar_Har_29	KAR_HAR	KAR	HAR	NA	NA	0	0	1	0	1	1	0	1	0	1	0	0	0	0	1	0	0	0	0	0	1	0	0	1	1	1	1	0	0	0	0	1	1	0	0	0	0	0	0	1	0	0	0	0
Kar_Har_30	KAR_HAR	KAR	HAR	NA	NA	1	0	1	0	1	1	0	1	0	0	0	0	0	0	1	0	0	0	1	1	1	0	1	1	0	1	0	0	0	1	1	0	1	0	0	1	1	0	0	0	0	0	0	0
Kar_Ref_04	KAR_REF	KAR	REF	T	2	0	0	1	0	0	0	1	1	1	0	0	0	0	0	1	0	0	0	0	0	0	0	1	0	0	1	0	0	0	1	1	0	1	0	0	0	1	0	0	1	1	0	1	1
Kar_Ref_05	KAR_REF	KAR	REF	NA	NA	1	0	1	1	0	1	0	1	1	1	1	0	0	0	1	1	0	1	0	0	1	0	1	1	0	1	0	0	0	1	1	0	1	0	0	1	1	0	0	0	0	0	0	0
Kar_Ref_06	KAR_REF	KAR	REF	NA	NA	0	1	1	0	0	1	0	1	1	0	1	0	1	1	0	1	0	1	0	1	1	0	1	1	1	1	1	0	0	1	1	0	1	0	0	1	1	0	0	1	1	0	1	0
Kar_Ref_07	KAR_REF	KAR	REF	E	0	0	0	1	0	1	0	0	0	0	0	1	0	0	0	1	0	0	1	0	1	0	0	1	0	0	1	0	0	0	1	1	0	1	0	0	0	0	0	0	1	0	1	0	0
Kar_Ref_08	KAR_REF	KAR	REF	E	0	0	0	0	0	0	0	0	0	0	0	1	0	0	0	1	0	0	0	0	0	0	0	0	0	0	1	0	0	0	1	0	1	1	0	0	0	0	0	0	1	0	0	1	0
Kar_Ref_09	KAR_REF	KAR	REF	NA	NA	1	0	1	0	0	1	0	0	1	0	0	1	0	0	1	1	0	0	0	0	1	0	0	1	0	1	0	0	0	1	0	0	1	0	0	0	1	0	0	0	1	0	0	0
Kar_Ref_10	KAR_REF	KAR	REF	E	0	0	0	0	0	0	0	0	0	0	0	1	0	0	0	1	0	0	0	0	1	0	0	0	0	1	1	0	0	0	0	0	0	1	0	0	0	0	0	1	0	0	0	0	0
Kar_Ref_11	KAR_REF	KAR	REF	H	1	1	0	1	0	0	1	1	1	1	0	1	0	0	0	1	0	0	1	0	0	1	1	0	1	0	1	0	0	0	1	0	1	1	0	0	0	0	0	0	0	1	0	1	0
Kar_Ref_12	KAR_REF	KAR	REF	H	1	0	1	1	1	1	0	0	1	0	1	1	0	0	0	1	1	1	1	0	1	1	0	0	1	0	1	0	0	0	0	1	1	1	1	0	1	1	0	0	1	0	0	1	0
Kar_Ref_13	KAR_REF	KAR	REF	H	1	0	0	1	0	0	0	1	0	0	0	1	0	0	0	0	1	0	0	0	0	0	0	1	0	0	1	0	0	0	1	0	0	1	0	0	0	0	0	0	0	1	0	1	0
Kar_Ref_14	KAR_REF	KAR	REF	NA	NA	1	0	0	0	1	0	0	1	1	0	1	0	0	0	0	0	1	0	1	1	1	0	1	1	0	1	0	0	0	1	1	0	1	1	0	0	0	0	1	1	1	0	1	0
Kar_Ref_15	KAR_REF	KAR	REF	NA	NA	0	1	1	0	0	0	1	0	1	0	1	0	0	0	1	0	0	0	0	0	1	0	1	1	1	1	0	0	0	1	0	0	1	0	0	0	1	0	0	0	0	0	1	0
Kar_Ref_16	KAR_REF	KAR	REF	T	2	0	0	1	0	0	1	1	1	1	0	1	0	0	0	1	1	0	0	0	0	1	0	0	1	0	1	0	0	0	0	0	0	1	0	0	1	1	0	0	0	0	1	0	0
Kar_Ref_17	KAR_REF	KAR	REF	E	0	1	1	1	0	1	0	1	1	0	1	1	0	0	0	1	0	0	0	1	0	1	1	1	0	0	1	0	0	0	1	1	0	1	0	0	1	0	0	0	1	0	0	1	0
Kar_Ref_18	KAR_REF	KAR	REF	E	0	1	1	1	0	1	1	0	0	0	0	1	0	1	0	1	0	0	0	0	0	0	1	1	0	0	1	1	0	0	0	1	1	1	0	0	0	1	1	0	0	1	0	0	0
Kar_Ref_19	KAR_REF	KAR	REF	H	1	0	0	0	0	1	0	0	1	0	0	1	0	0	0	1	0	0	0	0	0	0	0	0	0	0	1	0	0	0	1	0	0	0	0	0	0	0	0	1	0	0	1	0	0
Kar_Ref_20	KAR_REF	KAR	REF	H	1	1	0	1	0	1	1	1	1	0	1	1	0	0	0	1	1	1	0	0	0	0	0	1	1	0	0	0	0	0	1	0	0	1	0	0	0	0	0	0	0	0	0	0	0
Kar_Ref_21	KAR_REF	KAR	REF	NA	NA	1	1	1	0	0	1	1	1	1	0	1	0	1	0	1	1	0	0	1	1	1	0	0	1	1	1	0	0	0	1	0	1	1	1	0	1	1	0	0	0	1	0	1	1
Kar_Ref_22	KAR_REF	KAR	REF	H	1	0	0	0	0	0	0	1	0	1	0	0	0	0	1	1	0	0	0	0	0	0	0	0	0	0	1	0	0	0	0	1	0	0	0	0	0	0	0	0	1	1	0	0	1
Kar_Ref_23	KAR_REF	KAR	REF	E	0	0	0	0	0	0	0	0	0	0	0	0	0	1	1	1	0	0	0	0	0	0	0	1	0	0	1	0	0	0	0	1	0	0	0	0	0	0	0	0	1	1	1	0	1
Kar_Ref_24	KAR_REF	KAR	REF	NA	NA	0	0	1	0	0	0	0	0	1	0	1	0	0	0	1	0	0	0	0	0	1	0	1	0	0	1	0	0	1	1	1	0	1	0	1	0	0	0	0	0	1	1	0	0
Kar_Ref_25	KAR_REF	KAR	REF	E	0	1	0	1	0	0	0	0	1	0	0	0	0	0	0	1	0	0	0	0	0	0	0	0	0	0	1	0	0	0	0	1	0	1	0	0	0	0	0	0	0	1	0	0	1
Kar_Ref_26	KAR_REF	KAR	REF	H	1	0	0	0	0	0	0	0	0	0	0	0	0	0	0	1	0	0	0	0	0	0	0	0	0	0	1	0	0	0	0	0	0	1	0	0	0	0	0	0	0	0	0	1	0
Kar_Ref_27	KAR_REF	KAR	REF	E	0	0	1	0	0	0	1	0	1	0	0	1	0	0	0	1	1	0	1	0	0	1	1	1	0	0	1	0	0	0	1	1	1	1	0	0	0	1	0	1	0	1	0	1	0
Kar_Ref_28	KAR_REF	KAR	REF	E	0	0	0	0	0	0	0	1	0	1	0	1	0	0	0	0	0	0	0	0	0	1	0	1	0	0	1	0	0	0	1	1	1	1	1	0	0	0	0	0	1	1	0	1	0
Kar_Ref_29	KAR_REF	KAR	REF	E	0	0	0	0	0	0	0	0	0	0	1	1	0	0	0	1	1	0	0	0	0	1	0	0	0	0	1	0	0	0	1	1	1	0	0	1	0	0	0	0	0	0	0	0	0
Kar_Ref_30	KAR_REF	KAR	REF	E	0	1	0	1	0	0	0	0	1	1	0	1	0	0	1	0	0	1	1	0	0	1	0	1	0	0	1	0	0	0	1	1	0	1	0	0	0	1	0	0	0	0	0	1	0
Kar_STP_01	KAR_STP	KAR	STP	E	0	1	1	0	0	0	0	0	0	0	0	1	0	0	0	1	0	1	1	0	0	0	0	1	0	0	1	0	0	0	0	0	0	1	0	0	0	0	0	0	0	1	1	0	0
Kar_STP_03	KAR_STP	KAR	STP	H	1	0	1	1	0	0	0	0	0	0	1	1	0	0	0	1	0	0	0	0	0	0	0	0	0	0	1	0	0	0	1	1	0	0	0	0	0	0	0	0	0	0	1	0	0
Kar_STP_04	KAR_STP	KAR	STP	NA	NA	0	0	1	0	1	0	0	1	0	0	0	0	0	0	1	0	0	0	0	0	0	0	0	1	1	1	0	1	0	1	1	0	1	0	0	1	0	0	0	0	0	0	1	0
Kar_STP_08	KAR_STP	KAR	STP	NA	NA	0	0	1	0	1	0	1	0	0	0	0	0	0	0	1	0	1	0	0	1	1	1	0	1	0	1	0	0	0	1	0	0	1	0	0	0	0	0	0	0	0	0	0	0
Kar_STP_09	KAR_STP	KAR	STP	NA	NA	0	1	1	0	0	1	0	0	0	0	0	0	0	0	1	0	0	0	0	0	1	0	0	1	0	1	0	0	0	0	0	0	1	0	0	0	1	0	0	0	0	0	0	0
Kar_STP_10	KAR_STP	KAR	STP	H	1	1	0	0	0	0	0	0	0	0	0	0	0	0	0	1	0	0	0	0	0	0	0	0	0	0	1	0	0	0	0	1	0	1	0	0	0	0	0	0	0	1	0	0	0
Kar_STP_12	KAR_STP	KAR	STP	H	1	1	0	1	0	0	1	1	0	0	0	0	1	0	0	1	0	1	0	0	0	1	0	0	1	1	1	0	0	0	1	1	0	1	0	0	0	0	0	0	0	0	0	0	0
Kar_STP_13	KAR_STP	KAR	STP	H	1	0	1	0	0	0	1	0	1	0	0	1	0	0	0	0	1	0	0	0	0	0	0	0	1	0	1	0	0	0	1	1	0	1	0	0	0	0	0	0	1	0	1	0	0
Kar_STP_14	KAR_STP	KAR	STP	E	0	0	0	0	0	0	1	0	1	0	1	1	0	0	0	1	0	0	0	0	0	0	0	1	0	0	1	0	0	0	1	1	0	1	0	0	0	0	0	0	0	1	0	0	0
Kar_STP_15	KAR_STP	KAR	STP	H	1	1	1	1	0	1	0	0	1	0	0	1	0	0	0	1	0	0	1	0	0	1	0	1	0	0	1	1	0	0	1	1	0	1	1	0	0	0	0	0	0	1	1	0	0
Kar_STP_16	KAR_STP	KAR	STP	NA	NA	1	0	0	0	1	0	1	0	1	0	1	0	0	0	0	0	0	0	0	0	1	0	1	1	1	1	0	0	0	0	0	0	1	0	0	0	0	0	0	1	0	0	1	0
Kar_STP_17	KAR_STP	KAR	STP	H	1	0	0	1	0	0	1	0	0	0	0	1	0	0	1	1	1	0	0	0	0	0	0	0	0	0	1	1	0	0	1	0	0	1	0	0	0	0	0	1	0	0	0	0	0
Kar_STP_18	KAR_STP	KAR	STP	T	2	0	1	1	1	0	1	0	1	1	0	0	0	0	0	1	0	0	0	0	0	1	0	0	1	0	1	1	0	0	0	0	1	1	0	0	0	0	0	0	0	1	0	0	0
Kar_STP_19	KAR_STP	KAR	STP	H	1	0	0	1	0	0	1	0	0	0	0	1	0	1	0	1	0	0	0	0	1	1	0	0	1	0	1	0	0	1	1	1	0	1	0	0	0	1	0	0	1	1	0	1	0
Kar_STP_20	KAR_STP	KAR	STP	T	2	1	0	1	0	0	0	0	0	0	0	1	0	0	1	1	0	0	0	0	0	0	0	1	0	0	1	0	0	0	1	1	1	1	1	0	1	1	0	0	1	0	1	0	0
Kar_STP_21	KAR_STP	KAR	STP	NA	NA	1	0	1	0	0	1	1	1	0	1	0	1	1	0	1	0	1	1	0	1	1	0	1	1	0	1	1	1	0	1	1	1	1	1	0	1	0	0	1	0	1	1	1	1
Kar_STP_22	KAR_STP	KAR	STP	NA	NA	1	0	1	0	0	1	1	0	1	0	1	0	1	0	1	0	1	0	1	1	1	1	0	1	1	1	0	0	0	1	1	0	1	1	0	1	0	0	0	1	1	0	1	0
Kar_STP_23	KAR_STP	KAR	STP	E	0	1	0	0	0	0	1	0	1	1	0	1	0	0	0	1	0	0	1	0	0	0	0	1	0	0	1	1	0	0	1	1	0	1	0	1	0	0	0	1	0	1	1	0	0
Kar_STP_24	KAR_STP	KAR	STP	E	0	1	0	1	0	0	0	0	0	1	1	0	0	0	0	1	0	0	0	0	1	1	0	0	1	0	1	0	0	0	1	0	0	0	0	0	0	0	0	0	0	1	0	0	0
Kar_STP_25	KAR_STP	KAR	STP	NA	NA	0	0	1	0	1	0	0	0	1	0	0	0	0	0	0	0	0	0	0	1	1	0	0	0	0	1	0	0	0	1	1	0	0	0	0	0	0	0	0	0	0	0	0	0
Kar_STP_26	KAR_STP	KAR	STP	T	2	0	0	1	0	0	0	0	1	0	0	1	0	0	0	0	1	0	0	0	0	1	0	0	0	0	1	0	0	0	1	1	0	1	0	1	0	0	0	0	1	0	0	1	0
Kar_STP_27	KAR_STP	KAR	STP	H	1	0	1	1	0	1	1	0	1	0	0	1	1	0	0	1	1	1	0	0	0	1	0	1	1	0	1	0	0	0	1	1	0	1	0	0	0	0	0	0	0	1	0	0	0
Kar_STP_28	KAR_STP	KAR	STP	E	0	0	0	1	0	0	0	0	0	0	0	0	0	0	0	1	1	0	0	0	0	0	0	0	0	0	1	0	0	0	1	1	0	0	0	0	0	0	0	0	0	1	0	1	0
Kar_STP_29	KAR_STP	KAR	STP	NA	NA	0	1	1	0	0	1	1	0	1	0	0	1	0	0	1	0	0	0	0	0	1	0	0	1	1	1	0	0	0	1	0	0	1	0	0	0	1	0	1	0	1	0	1	0
Kar_STP_30	KAR_STP	KAR	STP	NA	NA	1	0	1	0	0	0	0	0	1	0	0	0	0	0	0	0	0	0	0	0	0	0	1	0	0	1	0	0	0	0	0	0	0	0	0	0	0	0	0	0	1	0	0	1
GDA_Har_01	GDA_HAR	GDA	HAR	T	2	1	0	1	0	0	0	0	1	0	0	1	0	0	0	1	0	1	0	0	0	0	0	1	1	0	1	0	0	0	1	1	0	1	0	0	0	0	0	0	1	0	1	1	0
GDA_Har_02	GDA_HAR	GDA	HAR	H	1	0	0	0	0	1	1	0	0	1	1	0	0	0	0	1	1	0	1	1	0	0	0	0	0	0	1	0	0	0	1	1	0	1	0	0	0	0	0	0	0	1	0	0	0
GDA_Har_03	GDA_HAR	GDA	HAR	E	0	1	0	1	0	0	0	0	0	1	0	0	0	0	0	1	1	0	0	0	1	1	0	1	1	0	1	0	0	0	1	1	0	1	1	0	1	1	0	0	0	1	0	1	0
GDA_Har_04	GDA_HAR	GDA	HAR	E	0	0	0	0	0	0	0	0	1	0	0	1	0	0	0	1	0	0	0	0	0	1	0	1	0	0	1	0	0	0	1	1	0	1	0	0	0	0	0	0	0	0	0	0	0
GDA_Har_05	GDA_HAR	GDA	HAR	H	1	0	0	1	0	0	0	0	1	0	0	1	0	0	0	1	0	0	0	0	1	1	0	0	0	0	1	0	0	0	1	0	1	1	0	0	1	0	0	1	0	1	0	0	0
GDA_Har_06	GDA_HAR	GDA	HAR	T	2	0	1	1	0	0	0	0	1	1	0	1	0	0	1	1	0	0	0	0	1	1	0	0	0	0	1	0	0	0	1	0	1	1	0	0	0	0	0	1	0	0	1	0	0
GDA_Har_07	GDA_HAR	GDA	HAR	H	1	1	1	1	0	0	1	1	0	1	0	1	0	0	0	1	0	0	0	1	0	1	1	0	1	1	1	1	0	0	1	1	0	1	1	0	1	0	0	0	1	0	1	1	1
GDA_Har_08	GDA_HAR	GDA	HAR	E	0	0	0	0	0	0	0	0	1	1	0	1	0	0	0	1	0	0	0	0	0	0	1	0	0	0	1	0	0	0	0	1	0	1	0	0	1	1	0	1	1	1	1	0	0
GDA_Har_09	GDA_HAR	GDA	HAR	H	1	0	0	1	0	1	0	1	0	0	0	1	0	0	0	1	1	0	0	0	0	1	0	0	1	0	1	0	0	0	1	1	1	1	0	0	1	0	0	0	0	0	0	0	0
GDA_Har_10	GDA_HAR	GDA	HAR	H	1	0	1	1	0	1	0	1	1	1	0	1	0	0	0	1	0	0	0	0	1	1	0	1	1	0	1	1	0	0	1	1	1	1	1	0	1	0	0	1	0	1	0	0	0
GDA_Har_11	GDA_HAR	GDA	HAR	E	0	0	1	1	0	0	1	0	1	0	0	1	0	0	0	1	1	1	1	0	1	0	0	1	1	1	1	0	1	0	1	1	0	1	1	0	1	1	0	0	0	1	0	1	0
GDA_Har_12	GDA_HAR	GDA	HAR	E	0	1	0	0	0	0	0	0	0	1	0	1	0	0	0	0	0	0	0	0	0	0	0	1	0	0	1	0	0	0	1	1	0	1	0	1	0	0	0	0	1	0	1	0	0
GDA_Har_13	GDA_HAR	GDA	HAR	H	1	0	0	1	0	1	0	0	1	0	0	0	1	0	0	0	1	0	0	0	0	0	0	1	0	0	1	0	0	0	1	1	0	1	0	1	0	1	0	0	1	0	0	0	0
GDA_Har_14	GDA_HAR	GDA	HAR	E	0	0	0	0	1	0	1	1	0	0	0	1	0	0	0	1	0	0	0	0	0	0	0	1	0	0	1	0	0	0	1	1	0	1	0	0	0	1	0	0	1	1	0	0	0
GDA_Har_21	GDA_HAR	GDA	HAR	T	2	0	0	1	0	1	1	0	0	0	0	1	0	0	0	0	0	0	0	0	0	1	0	0	0	0	1	0	0	0	1	1	0	1	0	0	0	0	1	0	1	1	0	0	0
GDA_Har_22	GDA_HAR	GDA	HAR	E	0	0	0	0	0	0	0	0	1	0	0	1	0	0	0	0	0	0	0	0	0	0	1	1	0	0	1	0	0	0	1	1	0	1	0	0	1	0	0	0	1	1	0	0	0
GDA_Har_23	GDA_HAR	GDA	HAR	E	0	0	0	0	0	0	0	0	0	0	0	0	0	0	0	0	0	0	0	0	0	0	0	0	0	0	1	0	0	0	1	1	0	0	0	1	1	0	0	0	0	1	0	0	0
GDA_Har_24	GDA_HAR	GDA	HAR	E	0	0	0	0	0	0	0	0	0	0	0	0	0	0	0	1	0	0	0	0	0	0	0	0	0	0	1	0	0	0	1	1	0	1	0	0	0	0	0	0	1	1	0	0	1
GDA_Har_25	GDA_HAR	GDA	HAR	E	0	1	0	0	0	0	1	1	0	0	0	0	0	0	0	1	0	0	0	0	0	0	0	1	0	0	1	0	0	0	0	0	1	1	0	0	0	0	0	0	1	1	0	0	1
GDA_Har_26	GDA_HAR	GDA	HAR	H	1	1	0	0	0	0	0	0	1	0	0	1	0	0	0	1	0	0	0	0	0	0	0	0	0	0	1	0	0	0	1	1	0	1	0	1	0	0	0	0	1	1	0	0	1
GDA_Har_27	GDA_HAR	GDA	HAR	H	1	0	1	1	0	0	0	0	0	1	0	0	0	0	0	1	0	0	0	0	0	0	0	0	0	0	1	0	0	0	0	1	0	1	0	0	0	0	0	1	0	1	0	0	1
GDA_Har_28	GDA_HAR	GDA	HAR	E	0	0	0	0	0	0	0	0	0	0	0	1	0	0	0	1	0	0	0	0	0	0	0	0	0	0	1	0	0	0	1	1	0	0	0	0	0	0	0	0	1	0	0	0	1
GDA_Har_29	GDA_HAR	GDA	HAR	E	0	0	0	0	0	0	1	0	0	1	1	0	0	0	0	1	0	0	0	0	0	0	0	0	0	0	1	0	0	0	0	0	1	1	0	0	0	0	0	0	0	0	0	0	0
GDA_Har_30	GDA_HAR	GDA	HAR	E	0	1	1	0	0	0	0	0	0	0	0	0	0	0	0	1	0	0	0	0	0	0	0	0	0	0	1	0	0	0	1	1	0	0	0	1	1	0	0	0	0	1	0	0	0
GDA_Ref_01	GDA_REF	GDA	REF	E	0	0	1	1	0	0	1	0	0	1	0	1	0	0	0	1	0	0	0	0	0	0	0	0	1	0	1	0	0	0	1	0	1	1	0	1	0	0	0	0	0	1	0	0	0
GDA_Ref_02	GDA_REF	GDA	REF	H	1	1	1	1	0	1	0	1	1	0	0	1	0	0	0	1	1	0	0	0	1	1	0	0	1	1	1	1	0	0	0	1	0	1	0	0	0	0	0	0	0	0	0	1	0
GDA_Ref_03	GDA_REF	GDA	REF	E	0	1	0	1	0	1	1	0	0	0	0	1	0	1	0	1	0	0	0	0	1	1	0	0	1	0	1	0	0	0	1	0	0	1	0	0	0	0	0	0	0	1	0	0	0
GDA_Ref_04	GDA_REF	GDA	REF	E	0	1	1	1	0	1	0	1	0	0	1	1	0	0	0	1	0	0	0	0	0	1	1	1	0	0	1	1	0	0	1	1	0	1	0	0	0	0	0	0	1	1	0	0	0
GDA_Ref_05	GDA_REF	GDA	REF	T	2	0	0	1	0	0	0	0	1	0	0	1	0	0	0	0	0	0	0	0	0	0	0	1	0	0	1	0	0	0	1	1	0	1	0	0	0	0	0	0	0	1	0	1	0
GDA_Ref_06	GDA_REF	GDA	REF	H	1	0	1	1	0	1	1	0	1	0	0	0	0	0	0	0	0	0	1	0	0	0	0	1	0	0	1	0	0	0	1	1	0	1	0	0	1	0	0	0	1	1	0	0	0
GDA_Ref_07	GDA_REF	GDA	REF	E	0	0	0	1	0	0	0	0	1	0	0	1	0	0	0	1	0	0	0	0	0	1	0	0	0	0	1	0	1	0	1	1	0	0	1	0	1	0	0	0	0	1	1	0	0
GDA_Ref_08	GDA_REF	GDA	REF	H	1	1	0	1	0	0	0	0	0	0	0	1	0	0	0	1	0	0	1	0	0	0	0	0	0	0	1	1	0	0	1	1	0	1	0	0	0	0	0	1	0	1	0	0	0
GDA_Ref_09	GDA_REF	GDA	REF	H	1	0	1	1	0	0	1	0	1	1	1	1	0	0	0	1	0	1	1	0	0	1	0	0	1	0	1	0	0	0	1	0	1	1	0	0	1	1	0	0	0	1	0	0	0
GDA_Ref_10	GDA_REF	GDA	REF	H	1	1	0	1	1	0	0	0	1	1	0	0	0	0	0	0	0	1	0	0	0	1	0	0	1	0	1	0	0	1	1	1	0	0	0	0	0	0	0	0	1	1	0	0	0
GDA_Ref_11	GDA_REF	GDA	REF	E	0	0	1	1	0	1	0	0	0	1	1	0	0	0	0	1	1	0	0	0	0	0	0	0	1	1	1	0	1	0	0	0	0	1	1	0	0	1	0	0	0	1	0	1	0
GDA_Ref_12	GDA_REF	GDA	REF	H	1	0	0	0	0	0	0	0	0	0	0	1	0	0	1	1	1	0	0	0	0	0	0	1	0	0	1	0	0	1	1	0	1	1	1	0	0	0	0	0	0	1	0	0	0
GDA_Ref_13	GDA_REF	GDA	REF	E	0	0	1	1	0	1	0	0	0	0	1	1	0	0	0	1	0	1	0	0	0	0	0	1	0	0	1	0	0	1	1	0	0	1	0	0	0	0	0	0	1	1	1	0	0
GDA_Ref_14	GDA_REF	GDA	REF	H	1	0	0	1	0	1	0	1	1	0	0	1	0	0	0	1	1	0	0	0	0	1	0	1	0	0	1	1	1	0	1	1	1	1	0	0	0	0	0	0	0	1	1	0	0
GDA_Ref_15	GDA_REF	GDA	REF	T	2	0	1	0	0	0	0	0	1	0	0	0	0	0	0	0	0	0	0	0	1	1	0	1	0	0	1	0	0	0	1	1	0	1	0	0	1	0	1	0	1	0	0	0	0
GDA_Ref_16	GDA_REF	GDA	REF	E	0	0	0	1	0	0	1	0	1	0	0	0	0	0	0	1	0	0	1	0	1	1	0	1	0	0	1	0	0	0	1	1	1	1	1	1	0	0	0	1	1	1	0	0	0
GDA_Ref_17	GDA_REF	GDA	REF	H	1	0	1	0	0	0	0	1	1	0	0	0	0	0	1	1	0	0	1	0	0	0	0	0	1	0	1	1	0	0	1	1	1	1	1	0	0	1	0	0	0	0	1	0	0
GDA_Ref_18	GDA_REF	GDA	REF	H	1	1	0	0	0	0	0	0	0	0	0	1	0	0	0	1	0	0	0	0	0	0	0	0	0	0	1	0	0	0	1	1	0	0	0	0	0	0	0	0	1	1	0	0	0
GDA_Ref_19	GDA_REF	GDA	REF	E	0	0	1	1	0	0	1	0	0	0	1	0	0	0	0	1	0	0	0	0	1	1	0	0	1	1	1	0	0	0	1	1	0	0	0	0	0	0	0	0	0	1	0	0	0
GDA_Ref_20	GDA_REF	GDA	REF	T	2	0	0	1	0	1	0	0	0	1	0	1	0	1	0	1	0	0	0	0	1	1	1	1	0	0	0	0	0	0	1	1	0	1	0	0	0	0	0	0	0	1	1	0	0
GDA_Ref_21	GDA_REF	GDA	REF	H	1	0	1	1	0	1	0	1	1	1	0	0	1	0	0	1	1	0	0	0	0	1	1	1	1	1	1	0	0	0	1	1	0	1	0	0	0	0	0	0	0	0	1	1	0
GDA_Ref_22	GDA_REF	GDA	REF	E	0	0	1	1	0	0	1	1	0	1	0	1	0	0	1	0	0	0	0	0	0	0	0	0	0	0	1	0	0	0	1	1	1	1	0	0	0	0	0	0	1	1	0	0	0
GDA_Ref_23	GDA_REF	GDA	REF	E	0	0	0	1	0	1	0	1	0	0	0	1	0	0	0	0	0	0	0	0	0	0	0	1	1	0	1	0	1	0	1	1	1	0	0	0	1	0	0	0	0	1	0	1	0
GDA_Ref_24	GDA_REF	GDA	REF	E	0	1	1	0	0	0	0	1	1	0	1	0	1	1	0	1	0	1	0	1	0	0	0	0	1	0	1	0	0	0	1	0	0	1	0	0	1	0	0	0	1	0	0	0	0
GDA_Ref_25	GDA_REF	GDA	REF	E	0	0	0	0	0	0	0	0	0	0	0	0	0	0	0	0	1	0	0	0	0	0	0	0	1	0	1	0	0	0	1	1	0	1	1	0	1	0	0	1	0	1	1	0	0
GDA_Ref_26	GDA_REF	GDA	REF	E	0	1	0	1	0	0	0	0	1	0	1	0	0	0	0	0	0	0	1	0	0	0	1	1	0	0	1	1	0	0	1	0	1	1	0	1	0	1	0	0	1	1	1	0	0
GDA_Ref_27	GDA_REF	GDA	REF	H	1	0	0	0	0	0	1	0	1	0	0	1	0	0	0	1	1	0	0	0	0	0	0	0	0	0	1	1	0	0	1	0	1	1	0	0	1	1	0	0	0	0	1	0	0
GDA_Ref_28	GDA_REF	GDA	REF	H	1	0	0	0	0	0	0	0	0	0	0	0	0	0	0	1	0	0	0	0	0	0	0	0	0	0	1	0	0	0	0	1	0	1	0	0	0	0	0	0	0	1	0	0	0
GDA_Ref_29	GDA_REF	GDA	REF	E	0	0	0	1	0	0	0	0	0	0	0	1	0	0	0	1	0	0	1	0	0	1	0	1	0	0	1	1	0	0	1	1	0	1	0	0	1	0	0	0	0	1	0	0	0
GDA_Ref_30	GDA_REF	GDA	REF	H	1	0	0	0	0	1	0	0	0	0	0	0	0	0	0	1	1	0	0	0	0	0	0	0	0	0	1	0	0	0	0	1	0	1	0	0	0	0	0	0	1	1	0	0	0
GDA_STP_01	GDA_STP	GDA	STP	NA	NA	1	1	1	0	1	1	0	0	0	0	0	0	0	0	1	0	1	0	0	0	0	0	1	1	0	1	0	0	0	1	0	1	1	0	0	0	0	0	0	0	0	0	0	0
GDA_STP_02	GDA_STP	GDA	STP	T	2	0	1	1	0	0	1	1	0	1	0	0	0	0	0	1	0	0	0	0	1	1	0	0	1	0	1	1	0	0	1	1	0	1	0	0	0	0	0	0	1	1	0	1	0
GDA_STP_03	GDA_STP	GDA	STP	H	1	0	0	1	0	0	0	1	1	0	0	1	0	0	0	0	1	0	0	0	1	0	0	1	1	0	1	0	0	0	1	1	0	1	1	0	0	0	0	0	0	1	0	0	0
GDA_STP_04	GDA_STP	GDA	STP	E	0	0	0	1	0	0	0	0	0	0	0	1	0	0	0	1	1	0	0	0	0	0	0	0	0	0	1	0	0	0	1	0	0	1	0	0	1	0	0	0	0	0	0	0	0
GDA_STP_05	GDA_STP	GDA	STP	H	1	0	0	1	0	0	0	1	1	0	0	1	0	0	0	1	0	0	0	0	0	0	0	1	0	0	1	0	0	0	1	1	0	0	0	0	0	0	0	0	1	1	0	1	0
GDA_STP_06	GDA_STP	GDA	STP	H	1	0	1	1	0	0	1	1	1	0	1	1	1	0	0	1	0	0	1	1	0	1	0	1	1	1	1	0	0	1	1	0	0	1	1	0	0	1	0	0	1	1	0	1	0
GDA_STP_07	GDA_STP	GDA	STP	E	0	0	1	1	0	1	0	0	0	0	0	1	0	0	0	1	0	0	0	0	0	0	0	0	0	0	1	1	0	0	1	1	0	1	0	0	0	0	0	0	1	1	1	1	0
GDA_STP_08	GDA_STP	GDA	STP	E	0	0	0	1	0	0	0	0	1	1	0	1	0	0	0	0	0	0	0	1	1	1	0	1	0	0	1	1	0	0	1	1	0	1	0	0	1	0	0	0	1	0	0	0	0
GDA_STP_09	GDA_STP	GDA	STP	E	0	1	0	0	1	0	1	0	1	1	0	1	0	0	0	1	0	1	1	0	1	1	0	1	1	0	1	0	0	0	1	1	0	1	0	0	0	0	0	0	0	0	1	0	0
GDA_STP_10	GDA_STP	GDA	STP	H	1	1	0	0	0	0	0	0	1	1	0	0	0	0	0	1	0	1	0	0	0	1	0	0	0	0	1	0	0	0	1	0	0	1	0	0	0	1	0	0	0	0	0	0	0
GDA_STP_11	GDA_STP	GDA	STP	E	0	0	0	1	0	1	0	1	1	0	0	1	0	0	0	0	0	0	1	0	0	1	0	1	0	0	1	0	0	0	1	1	0	1	0	0	0	0	0	1	0	1	0	0	0
GDA_STP_12	GDA_STP	GDA	STP	T	2	0	0	1	0	0	0	0	0	0	0	0	0	0	0	1	0	0	0	0	0	0	0	0	0	0	1	0	1	0	1	1	0	0	0	0	0	0	0	0	1	1	0	0	0
GDA_STP_13	GDA_STP	GDA	STP	T	2	1	0	0	0	0	0	0	0	0	0	1	0	0	0	1	0	0	1	0	0	0	0	1	0	1	1	0	0	0	1	1	0	1	0	0	0	0	0	0	0	0	1	1	0
GDA_STP_14	GDA_STP	GDA	STP	E	0	0	0	1	0	0	0	0	1	0	0	1	0	1	0	1	1	0	1	0	0	1	0	1	0	0	1	0	0	0	1	1	0	1	0	0	0	1	1	0	0	1	0	0	0
GDA_STP_15	GDA_STP	GDA	STP	T	2	0	0	0	0	0	0	0	0	0	1	1	0	0	0	0	1	0	1	1	0	0	0	1	0	0	1	0	0	0	1	0	1	1	0	0	1	0	0	1	0	0	0	0	0
GDA_STP_16	GDA_STP	GDA	STP	T	2	0	0	1	0	0	0	0	0	1	0	0	0	0	0	0	0	0	0	0	0	0	0	0	1	0	0	0	0	0	1	0	1	1	0	0	0	1	0	1	1	0	0	0	0
GDA_STP_17	GDA_STP	GDA	STP	T	2	1	1	1	0	1	1	1	1	1	0	1	0	0	0	1	1	0	1	0	0	1	0	0	1	0	1	0	1	0	1	1	0	1	1	0	1	0	0	0	1	1	0	1	1
GDA_STP_18	GDA_STP	GDA	STP	E	0	1	1	0	0	0	1	1	1	1	0	1	0	0	0	1	0	0	0	1	0	1	0	0	1	0	1	0	1	0	1	1	0	1	1	0	0	0	0	0	0	1	0	0	0
GDA_STP_19	GDA_STP	GDA	STP	H	1	0	0	1	0	1	0	0	1	0	0	0	0	0	0	1	1	0	0	0	0	1	1	1	0	0	1	0	0	0	1	1	1	1	0	1	0	0	0	1	0	1	1	1	0
GDA_STP_21	GDA_STP	GDA	STP	E	0	1	1	1	0	1	1	0	1	1	0	1	0	0	0	1	1	0	1	1	1	1	0	0	1	1	1	0	0	0	1	1	0	1	1	0	0	0	0	0	0	1	0	1	0
GDA_STP_22	GDA_STP	GDA	STP	H	1	0	1	1	0	0	1	0	0	1	0	1	0	0	0	1	0	0	1	1	1	1	0	1	1	0	1	1	0	0	1	1	0	1	0	0	1	0	0	0	0	1	0	0	0
GDA_STP_23	GDA_STP	GDA	STP	T	2	0	1	0	0	1	1	0	0	0	0	0	0	0	0	1	0	0	0	0	0	1	0	0	1	0	1	0	0	0	1	0	0	0	0	0	0	0	0	0	0	0	0	0	0
GDA_STP_24	GDA_STP	GDA	STP	E	0	0	1	0	0	1	1	0	0	0	0	0	0	0	0	1	0	0	0	0	0	1	0	0	1	0	1	0	0	0	1	0	0	0	0	0	0	0	0	0	0	0	0	0	0
GDA_STP_25	GDA_STP	GDA	STP	T	2	0	0	1	0	1	0	0	0	0	0	1	0	0	0	1	0	0	0	0	0	0	0	0	1	0	1	0	0	0	1	0	0	1	0	0	0	0	0	0	0	0	0	0	0
GDA_STP_26	GDA_STP	GDA	STP	E	0	1	0	1	0	1	0	0	1	0	0	0	0	0	0	1	0	1	0	0	0	0	0	1	1	0	1	0	0	0	1	0	0	0	0	0	0	0	0	0	1	1	0	0	0
GDA_STP_27	GDA_STP	GDA	STP	H	1	1	1	1	1	0	0	0	0	0	1	0	0	0	0	1	0	0	0	0	0	0	0	0	1	0	1	1	0	0	1	1	0	0	0	0	1	1	0	0	0	1	0	0	0
GDA_STP_28	GDA_STP	GDA	STP	H	1	0	0	0	0	0	0	1	0	0	0	0	0	0	0	0	0	0	1	0	1	1	0	1	0	0	1	0	0	0	1	1	0	1	0	1	0	1	0	0	1	1	0	0	0
GDA_STP_29	GDA_STP	GDA	STP	E	0	1	1	0	0	1	0	0	0	0	0	1	0	0	0	0	0	1	0	0	0	1	0	0	0	0	1	0	0	0	0	0	0	1	0	1	0	0	0	0	0	1	0	0	0
GDA_STP_30	GDA_STP	GDA	STP	H	1	0	0	1	1	1	0	0	0	1	0	1	0	0	0	1	0	0	0	0	0	0	0	0	0	0	1	0	0	0	0	0	0	1	0	0	0	0	0	0	0	1	0	0	1
[truncated: 310 more columns]

## Sheet: STP_REF_ALL
SAMPLE	SITE	LOCATION	POLLUTION_TYPE	SPECIES	TROSSULUS	PrimH_1	PrimH_2	PrimH_3	PrimH_4	PrimH_5	PrimH_6	PrimH_7	PrimH_8	PrimH_9	PrimH_10	PrimH_13	PrimH_14	PrimH_18	PrimH_19	PrimH_21	PrimH_22	PrimH_23	PrimH_24	PrimH_25	PrimH_26	PrimH_27	PrimH_28	PrimH_29	PrimH_30	PrimH_31	PrimH_33	PrimH_35	PrimH_37	PrimH_38	PrimH_39	PrimH_40	PrimH_41	PrimH_42	PrimH_43	PrimH_44	PrimH_45	PrimH_46	PrimH_48	PrimH_49	PrimH_50	PrimH_51	PrimH_52	PrimH_54	PrimH_55
Ask_Ref_01	ASK_REF	ASK	REF	H	1	1	0	0	0	1	0	1	0	1	0	0	0	0	0	0	1	0	0	0	1	1	0	1	1	0	1	1	0	0	1	0	1	1	0	1	1	0	0	0	0	0	0	0	0
Ask_Ref_02	ASK_REF	ASK	REF	E	0	1	1	1	0	1	0	0	1	1	0	1	1	0	0	0	0	0	1	0	1	1	0	1	1	0	1	0	0	0	1	0	0	1	1	0	1	0	0	1	1	0	0	0	0
Ask_Ref_03	ASK_REF	ASK	REF	H	1	1	1	1	0	0	0	1	1	0	0	0	0	1	1	1	0	0	0	0	0	1	0	0	1	0	1	0	0	0	1	1	0	0	0	0	0	0	0	1	1	0	0	1	0
Ask_Ref_04	ASK_REF	ASK	REF	H	1	1	0	1	0	1	1	0	0	1	0	1	0	0	0	0	0	0	0	0	1	0	0	1	1	0	1	1	0	0	1	1	0	0	0	0	0	1	0	0	0	1	0	0	1
Ask_Ref_06	ASK_REF	ASK	REF	E	0	0	0	0	0	0	0	0	1	1	0	0	0	1	0	1	0	0	0	0	0	0	0	0	0	0	1	0	0	0	1	1	0	1	0	0	0	0	0	0	0	1	0	0	0
Ask_Ref_07	ASK_REF	ASK	REF	T	2	1	0	0	0	0	0	0	0	0	0	0	0	0	0	0	0	0	0	0	0	1	0	1	1	0	0	0	0	0	0	1	0	1	1	0	1	1	0	1	0	0	0	0	0
Ask_Ref_08	ASK_REF	ASK	REF	E	0	0	0	1	0	1	0	0	0	0	0	0	0	1	0	0	0	0	1	0	1	0	0	1	0	0	1	0	1	0	1	0	0	1	0	0	1	0	0	0	0	0	0	0	0
Ask_Ref_10	ASK_REF	ASK	REF	H	1	0	0	0	0	0	0	0	1	1	1	1	0	0	0	0	1	0	1	0	0	1	0	1	0	0	1	0	0	0	1	1	1	1	0	0	1	0	0	0	0	1	1	1	0
Ask_Ref_11	ASK_REF	ASK	REF	E	0	1	1	0	0	1	0	0	0	1	0	1	0	1	0	1	1	0	0	0	0	1	0	1	0	0	1	0	0	0	1	1	0	1	0	0	0	1	0	1	0	0	0	0	0
Ask_Ref_12	ASK_REF	ASK	REF	T	2	0	0	0	0	0	0	0	0	1	1	0	1	0	0	0	0	0	0	0	0	0	1	1	0	0	1	0	0	0	1	1	0	1	0	0	0	0	0	0	0	1	0	0	0
Ask_Ref_13	ASK_REF	ASK	REF	E	0	1	0	0	0	0	0	0	0	0	0	1	0	0	0	0	1	0	0	0	0	0	0	1	0	0	1	0	0	0	1	1	0	0	0	1	0	0	0	0	1	0	0	0	0
Ask_Ref_14	ASK_REF	ASK	REF	T	2	0	0	1	1	0	0	0	1	0	0	1	0	0	0	1	1	0	0	0	0	1	0	1	0	0	1	0	0	0	1	1	0	1	0	0	0	0	0	0	1	1	0	0	0
Ask_Ref_16	ASK_REF	ASK	REF	H	1	0	0	0	0	0	0	0	0	0	0	1	0	0	0	1	1	0	0	0	1	1	0	1	0	0	1	1	0	0	0	1	1	1	0	0	0	0	0	0	1	0	0	1	0
Ask_Ref_17	ASK_REF	ASK	REF	H	1	0	0	1	0	0	0	0	0	0	0	0	0	0	0	1	1	0	0	0	0	1	0	1	0	0	1	0	0	0	1	1	0	1	0	0	1	0	0	1	1	1	0	1	0
Ask_Ref_18	ASK_REF	ASK	REF	H	1	1	0	1	0	0	1	0	1	0	0	0	0	0	0	1	0	1	0	0	0	1	0	0	1	0	1	0	0	0	0	0	0	1	0	0	0	0	0	0	1	0	0	0	0
Ask_Ref_19	ASK_REF	ASK	REF	T	2	1	0	1	0	0	0	0	0	1	0	0	0	0	0	1	0	1	1	0	1	1	1	0	0	0	1	1	0	0	1	1	1	1	0	0	0	1	0	1	0	1	0	1	0
Ask_Ref_22	ASK_REF	ASK	REF	H	1	0	1	1	0	1	1	1	0	0	0	0	0	0	0	1	0	0	0	0	0	1	0	1	0	0	1	1	0	0	1	1	0	1	0	0	0	0	0	1	0	1	1	1	1
Ask_Ref_23	ASK_REF	ASK	REF	H	1	0	0	1	0	0	0	1	0	0	0	1	0	0	0	0	0	0	0	0	0	0	0	0	1	0	1	0	0	0	1	0	0	1	0	0	0	0	0	0	1	0	0	0	0
Ask_Ref_24	ASK_REF	ASK	REF	H	1	0	0	0	0	0	0	0	0	0	0	1	0	1	0	1	0	0	0	0	0	1	0	0	0	0	1	0	0	0	1	1	0	1	0	0	0	0	0	1	0	1	0	1	0
Ask_Ref_25	ASK_REF	ASK	REF	T	2	0	0	0	0	0	0	0	1	0	0	1	0	0	0	1	0	0	0	0	0	0	0	0	0	0	1	0	0	0	1	1	0	1	0	0	0	0	0	0	0	1	0	1	0
Ask_Ref_26	ASK_REF	ASK	REF	H	1	1	0	1	0	0	1	1	0	0	0	1	0	0	0	1	0	0	0	1	1	1	0	1	0	0	1	0	0	0	1	1	0	1	0	0	0	0	0	0	1	0	0	0	0
Ask_Ref_27	ASK_REF	ASK	REF	H	1	1	1	1	0	1	0	0	1	0	0	1	0	0	0	1	0	0	0	0	0	1	0	0	0	0	1	0	0	1	1	1	0	0	0	0	0	0	0	0	0	0	0	0	0
Ask_Ref_28	ASK_REF	ASK	REF	H	1	1	0	1	0	1	1	0	1	0	0	1	0	0	0	1	1	0	0	0	1	0	0	1	0	0	1	0	0	0	1	1	0	1	0	0	0	0	0	0	1	1	1	0	0
Ask_Ref_29	ASK_REF	ASK	REF	E	0	1	0	1	0	1	1	0	0	0	0	1	0	0	1	1	0	0	0	0	1	1	0	1	1	0	1	0	0	0	1	0	0	1	0	0	0	0	0	0	1	0	0	1	0
Ask_Ref_30	ASK_REF	ASK	REF	H	1	1	0	0	0	0	0	0	0	0	0	0	0	1	1	0	0	0	0	0	0	0	0	1	0	0	1	0	0	0	1	1	0	0	0	0	0	0	0	1	0	1	0	0	1
Ask_STP_01	ASK_STP	ASK	STP	H	1	1	1	1	0	0	1	1	0	1	0	1	0	0	1	0	0	1	0	0	0	1	0	0	1	1	1	0	0	1	1	1	0	1	0	0	0	1	1	1	0	1	0	1	1
Ask_STP_02	ASK_STP	ASK	STP	E	0	1	0	0	1	0	0	0	0	0	0	0	0	0	0	1	0	0	0	0	0	1	0	1	1	0	1	0	0	0	0	0	0	0	0	0	0	0	0	0	0	0	1	0	0
Ask_STP_03	ASK_STP	ASK	STP	E	0	0	0	0	0	1	0	1	0	0	0	0	0	1	0	1	0	0	0	0	0	1	0	1	0	0	1	0	0	0	1	0	0	1	1	0	0	0	0	0	0	1	0	1	0
Ask_STP_05	ASK_STP	ASK	STP	E	0	1	0	0	0	0	1	0	0	0	0	1	0	0	0	0	0	0	0	0	1	1	0	0	0	0	0	0	0	0	1	0	0	1	1	0	0	0	0	0	0	0	0	0	0
Ask_STP_06	ASK_STP	ASK	STP	T	2	1	0	0	1	1	0	0	0	1	1	1	0	1	0	1	1	1	0	0	1	0	0	1	1	0	1	0	0	0	1	0	1	1	0	0	1	0	0	1	0	0	0	0	1
Ask_STP_07	ASK_STP	ASK	STP	H	1	0	1	1	0	1	0	0	1	1	0	1	0	0	0	1	0	0	1	0	0	0	0	0	0	0	1	0	0	0	1	1	0	1	1	0	0	0	0	1	1	1	0	1	0
Ask_STP_09	ASK_STP	ASK	STP	T	2	1	0	1	0	0	0	0	0	0	0	1	0	0	0	1	0	0	0	0	0	0	0	1	0	0	1	0	0	0	1	0	0	1	0	0	0	1	0	1	0	0	1	1	0
Ask_STP_10	ASK_STP	ASK	STP	T	2	1	0	1	0	1	0	1	0	1	0	1	0	0	0	1	0	0	0	0	0	1	0	1	0	0	1	1	0	0	1	0	1	1	0	0	0	0	0	0	1	1	0	0	0
Ask_STP_11	ASK_STP	ASK	STP	E	0	1	0	1	0	1	0	0	1	0	1	1	0	0	0	0	1	0	1	0	0	1	1	1	1	1	1	1	0	1	1	1	0	1	0	1	0	0	0	0	0	1	0	1	0
Ask_STP_12	ASK_STP	ASK	STP	H	1	1	0	1	0	0	1	1	1	0	1	1	1	1	0	0	1	0	0	0	1	1	1	0	1	0	1	1	0	0	1	1	0	1	0	1	0	1	0	1	1	1	0	1	1
Ask_STP_13	ASK_STP	ASK	STP	E	0	0	1	1	0	1	0	0	0	0	1	1	0	1	0	1	0	0	1	0	1	1	0	1	0	0	1	0	0	1	1	1	1	0	0	0	1	0	0	0	1	1	0	0	0
Ask_STP_14	ASK_STP	ASK	STP	H	1	1	0	1	0	1	1	0	0	1	0	1	0	1	0	1	0	0	0	0	0	1	0	0	1	0	1	0	1	0	1	1	1	1	1	0	1	0	0	0	1	1	1	1	0
Ask_STP_15	ASK_STP	ASK	STP	H	1	1	0	1	0	0	0	0	0	0	0	1	0	0	0	0	0	0	0	0	0	1	1	0	0	0	1	0	0	0	1	0	0	1	0	0	1	0	1	0	1	1	0	0	0
Ask_STP_16	ASK_STP	ASK	STP	E	0	1	0	1	0	0	1	0	0	0	0	1	0	0	0	0	0	0	1	0	1	0	0	0	1	0	1	0	0	0	1	1	0	1	1	0	0	0	0	0	0	0	0	0	0
Ask_STP_17	ASK_STP	ASK	STP	E	0	0	0	0	0	0	0	0	0	0	1	1	0	0	0	1	0	0	0	0	0	0	0	1	0	0	1	0	1	0	1	1	0	1	0	0	0	0	0	1	0	1	0	1	0
Ask_STP_18	ASK_STP	ASK	STP	T	2	0	0	0	0	0	0	0	0	0	0	1	0	0	0	1	0	0	1	0	0	1	1	1	0	0	1	0	0	0	1	1	0	1	0	0	0	0	0	0	1	1	0	0	0
Ask_STP_19	ASK_STP	ASK	STP	T	2	1	1	1	0	1	0	0	1	0	0	1	0	0	0	1	0	0	0	0	1	1	0	1	0	0	1	0	0	0	1	1	0	1	0	0	0	0	0	0	1	1	0	0	1
Ask_STP_21	ASK_STP	ASK	STP	H	1	0	0	0	0	0	0	0	1	0	0	1	0	0	0	0	0	0	0	0	0	0	0	0	0	0	1	1	0	0	1	1	0	1	0	0	0	0	0	0	1	0	1	0	1
Ask_STP_23	ASK_STP	ASK	STP	NA	NA	1	1	1	0	1	0	0	0	0	1	1	0	0	0	1	0	0	0	0	0	1	1	1	1	0	1	0	0	0	0	0	1	1	0	0	0	0	0	1	0	1	1	1	0
Ask_STP_24	ASK_STP	ASK	STP	H	1	1	0	0	1	0	0	0	0	0	1	1	0	1	0	1	0	0	0	0	0	1	0	1	1	0	1	0	0	0	1	1	0	1	0	0	0	0	0	0	1	0	1	1	0
Ask_STP_25	ASK_STP	ASK	STP	T	2	1	0	1	0	1	1	0	1	1	0	1	0	1	0	1	0	0	1	0	0	1	0	1	1	0	1	0	1	0	1	1	1	1	0	0	0	1	0	0	1	1	0	0	0
Ask_STP_26	ASK_STP	ASK	STP	T	2	1	1	1	0	0	0	1	0	1	0	0	0	0	0	1	0	0	0	0	0	1	0	1	1	0	1	0	0	0	1	0	0	0	0	0	0	0	0	0	0	0	0	0	0
Ask_STP_27	ASK_STP	ASK	STP	T	2	0	1	0	0	0	1	1	1	0	0	1	1	0	0	0	0	1	1	0	1	1	1	0	1	1	1	0	0	0	1	0	1	1	0	0	1	0	0	0	0	1	0	1	1
Ask_STP_28	ASK_STP	ASK	STP	H	1	0	0	1	0	0	0	0	0	1	0	0	0	0	0	0	0	0	0	0	1	1	0	1	1	0	1	0	1	0	1	1	0	0	0	0	1	1	0	0	0	0	0	0	0
Ask_STP_30	ASK_STP	ASK	STP	T	2	0	0	1	0	1	0	0	0	0	0	0	0	0	0	1	0	0	0	0	0	0	0	0	0	0	1	0	0	0	1	1	0	1	0	0	0	0	0	1	0	0	0	0	1
TVA_Ref_01	TVA_REF	TVA	REF	T	2	0	0	1	1	0	0	0	0	1	0	1	0	0	0	1	1	0	0	0	0	1	0	0	1	0	1	0	0	0	1	1	0	1	0	0	0	1	0	0	1	1	0	0	0
TVA_Ref_02	TVA_REF	TVA	REF	E	0	0	1	1	0	0	0	0	0	0	0	1	0	0	0	1	0	0	0	0	0	1	0	1	0	0	1	0	0	0	1	0	0	0	0	0	0	0	0	1	0	0	0	1	0
TVA_Ref_03	TVA_REF	TVA	REF	E	0	0	0	1	0	0	0	0	1	1	0	1	0	0	0	0	1	0	1	0	0	0	0	0	0	0	1	0	0	0	1	0	0	1	0	0	1	0	0	0	1	0	0	0	0
TVA_Ref_04	TVA_REF	TVA	REF	H	1	0	0	0	0	0	0	0	1	0	0	0	0	0	0	1	1	0	0	0	0	1	0	1	0	0	1	0	0	0	1	1	0	0	0	0	1	0	0	0	0	0	0	0	0
TVA_Ref_05	TVA_REF	TVA	REF	E	0	0	0	1	0	1	0	1	0	1	0	1	0	0	0	1	0	0	0	0	0	0	0	0	1	0	1	0	0	0	1	1	0	1	0	0	0	0	0	0	1	0	0	0	0
TVA_Ref_06	TVA_REF	TVA	REF	H	1	0	0	1	0	0	1	1	0	0	0	0	0	0	0	0	0	0	0	0	0	0	0	1	0	0	1	0	1	0	1	0	0	1	0	0	0	0	0	0	0	0	0	1	0
TVA_Ref_07	TVA_REF	TVA	REF	T	2	0	0	0	0	1	1	0	0	0	1	1	0	0	0	1	0	1	0	0	0	0	0	1	0	0	1	0	0	0	1	1	0	1	0	0	1	0	0	0	0	0	1	0	0
TVA_Ref_08	TVA_REF	TVA	REF	E	0	1	0	1	0	1	0	0	0	0	0	1	0	0	0	0	0	0	0	1	0	0	0	1	0	0	1	1	0	0	1	1	0	0	0	0	0	0	0	0	0	0	0	1	0
TVA_Ref_09	TVA_REF	TVA	REF	NA	NA	1	1	1	0	0	0	0	0	1	0	0	0	0	0	1	0	0	0	0	0	0	0	1	0	0	1	0	0	0	1	0	0	1	0	0	0	0	0	0	0	0	0	0	0
TVA_Ref_10	TVA_REF	TVA	REF	H	1	0	0	0	0	0	1	0	0	0	0	0	0	0	0	1	0	0	0	0	0	1	0	1	0	0	1	1	0	0	1	1	0	1	0	0	0	0	0	0	1	1	0	0	0
TVA_Ref_11	TVA_REF	TVA	REF	E	0	0	1	0	0	0	0	0	1	0	0	1	0	0	0	0	0	0	1	0	0	1	0	1	0	0	1	0	0	0	1	1	0	1	0	0	0	0	0	0	0	1	0	0	0
TVA_Ref_12	TVA_REF	TVA	REF	H	1	0	0	0	0	1	0	1	0	0	0	1	0	0	0	1	0	0	0	0	0	1	0	0	1	0	1	0	1	0	0	1	0	1	1	0	1	1	0	0	0	0	0	0	0
TVA_Ref_13	TVA_REF	TVA	REF	E	0	1	0	1	0	1	0	1	1	0	0	1	1	1	0	1	0	0	0	1	0	1	0	0	1	1	1	0	0	0	1	1	0	1	0	0	0	0	0	0	1	1	0	1	0
TVA_Ref_14	TVA_REF	TVA	REF	H	1	1	1	1	0	0	1	0	0	0	0	1	0	1	0	0	1	1	0	0	0	1	0	0	1	0	1	1	0	0	1	1	0	1	0	0	1	1	0	1	1	1	0	1	0
TVA_Ref_15	TVA_REF	TVA	REF	H	1	1	0	0	0	0	0	0	0	0	0	0	1	0	1	1	1	0	0	0	0	0	0	1	0	0	1	0	1	0	1	0	1	1	0	0	1	0	1	0	0	1	0	0	0
TVA_Ref_16	TVA_REF	TVA	REF	E	0	1	0	1	0	0	0	0	1	1	0	1	0	0	0	0	0	0	0	0	0	1	0	1	0	0	1	1	0	0	1	1	0	1	0	0	0	0	0	1	0	1	1	0	0
TVA_Ref_17	TVA_REF	TVA	REF	T	2	1	0	1	0	1	0	0	0	0	1	0	0	0	0	1	0	0	0	1	0	1	0	1	1	0	1	0	0	0	1	1	0	0	0	0	0	0	0	0	1	1	0	0	0
TVA_Ref_18	TVA_REF	TVA	REF	H	1	1	1	1	0	0	0	1	1	1	0	0	0	0	0	1	0	0	0	0	0	0	1	1	0	0	1	0	1	0	1	1	0	0	0	0	0	0	0	0	1	1	0	1	1
TVA_Ref_20	TVA_REF	TVA	REF	H	1	0	0	1	1	1	0	0	0	0	0	0	0	1	0	1	0	0	0	0	1	1	0	0	0	0	1	0	0	0	0	1	0	0	0	0	0	0	0	0	0	0	0	0	0
TVA_Ref_21	TVA_REF	TVA	REF	T	2	0	0	0	0	1	0	1	0	0	0	1	0	0	0	1	1	0	1	0	0	1	0	1	0	0	1	0	0	0	1	1	0	1	0	0	1	1	0	1	0	0	1	1	0
TVA_Ref_22	TVA_REF	TVA	REF	H	1	1	0	1	0	0	0	0	0	0	0	0	0	0	0	0	0	0	0	0	0	0	0	0	0	0	1	0	0	0	1	1	0	0	0	0	0	0	0	0	1	1	0	0	1
TVA_Ref_23	TVA_REF	TVA	REF	T	2	0	1	1	0	0	1	0	0	0	0	1	0	1	0	1	1	0	0	0	0	1	1	1	0	0	1	0	0	0	1	1	0	1	0	0	0	0	0	0	1	1	0	1	0
TVA_Ref_24	TVA_REF	TVA	REF	T	2	0	0	0	0	0	0	0	1	0	0	1	0	0	1	1	0	0	0	0	0	0	0	1	0	0	1	1	0	0	1	1	0	1	0	0	0	0	0	0	0	1	1	0	0
TVA_Ref_25	TVA_REF	TVA	REF	H	1	0	0	1	0	0	0	0	1	0	0	1	0	0	0	1	1	0	0	0	0	0	1	1	0	0	1	0	0	1	1	1	0	1	0	0	0	0	0	1	1	0	1	0	0
TVA_Ref_26	TVA_REF	TVA	REF	H	1	0	0	1	0	0	0	0	0	0	0	1	0	0	0	1	1	0	0	1	1	1	0	1	0	0	1	0	0	0	1	1	0	1	1	0	1	1	0	1	1	1	0	0	0
TVA_Ref_29	TVA_REF	TVA	REF	H	1	1	0	0	0	0	0	0	0	1	1	1	0	0	0	0	0	0	0	0	0	1	0	0	0	0	1	1	0	0	1	1	1	1	0	0	1	1	0	1	1	0	1	0	0
TVA_Ref_30	TVA_REF	TVA	REF	E	0	0	0	0	0	0	0	0	0	0	0	1	1	0	0	1	0	0	0	0	0	1	0	0	1	0	1	0	1	0	1	1	0	1	0	0	0	1	0	0	0	1	0	0	1
TVA_STP_01	TVA_STP	TVA	STP	H	1	0	1	1	0	1	0	1	1	0	0	1	1	0	0	1	0	0	1	1	0	1	0	0	0	0	1	0	0	0	1	0	0	1	1	0	0	0	0	1	0	1	0	0	0
TVA_STP_02	TVA_STP	TVA	STP	H	1	1	0	0	0	1	1	1	0	0	0	1	0	0	0	0	0	0	0	1	0	1	0	1	1	0	1	0	0	0	0	1	0	0	1	0	0	0	0	0	0	0	0	1	0
TVA_STP_03	TVA_STP	TVA	STP	E	0	0	0	0	0	0	0	1	1	0	1	0	0	0	0	1	1	0	0	0	1	0	0	0	1	0	1	0	0	0	1	0	0	1	1	0	0	0	0	0	0	0	0	1	0
TVA_STP_04	TVA_STP	TVA	STP	T	2	0	0	0	0	1	0	0	0	0	0	1	0	0	1	1	0	0	0	0	0	0	0	1	0	0	1	0	0	0	1	0	1	1	0	0	0	1	0	1	0	0	0	0	1
TVA_STP_05	TVA_STP	TVA	STP	E	0	1	0	1	1	1	0	1	1	1	0	0	1	0	0	1	0	1	0	1	0	1	0	0	1	0	1	1	0	0	1	1	1	1	1	0	0	1	0	1	0	1	0	1	0
TVA_STP_06	TVA_STP	TVA	STP	H	1	0	0	0	0	0	0	0	1	0	0	0	0	0	0	0	1	0	0	0	1	1	0	1	1	1	1	1	1	0	0	0	0	0	0	0	1	1	0	0	1	1	0	0	0
TVA_STP_10	TVA_STP	TVA	STP	E	0	0	0	0	1	1	1	1	0	0	0	0	0	0	0	1	0	1	0	0	0	1	0	1	0	0	1	0	0	0	1	0	1	1	0	0	0	0	1	0	0	1	0	0	0
TVA_STP_12	TVA_STP	TVA	STP	H	1	0	0	1	0	1	0	0	0	0	0	1	0	0	0	0	0	0	0	0	1	0	0	1	0	0	1	0	0	0	1	1	1	1	0	0	0	1	0	0	0	1	0	1	0
TVA_STP_13	TVA_STP	TVA	STP	H	1	1	0	1	0	0	0	1	0	0	0	1	0	0	0	1	0	0	0	0	1	0	0	0	1	0	1	0	0	0	1	1	0	1	1	0	0	1	0	0	1	1	1	0	0
TVA_STP_14	TVA_STP	TVA	STP	H	1	0	0	1	0	0	0	0	0	1	0	1	0	0	0	1	0	0	0	0	1	1	0	1	0	0	1	0	0	0	1	1	0	1	0	0	1	0	0	0	1	1	0	1	0
TVA_STP_15	TVA_STP	TVA	STP	H	1	1	0	1	0	1	0	0	1	1	0	1	1	0	0	1	0	0	0	1	0	1	0	1	1	0	1	1	1	0	1	1	0	1	0	0	0	0	0	1	1	1	0	1	0
TVA_STP_16	TVA_STP	TVA	STP	H	1	0	0	0	0	1	0	0	1	0	0	1	0	0	1	1	0	0	0	0	0	1	0	1	0	0	1	0	0	0	1	1	0	1	0	0	0	0	0	1	1	1	0	0	0
TVA_STP_17	TVA_STP	TVA	STP	E	0	0	1	1	0	1	0	1	0	0	0	1	0	0	0	0	0	0	0	0	0	1	0	1	1	0	1	0	1	0	1	0	0	1	1	0	0	0	0	0	1	1	0	0	0
TVA_STP_19	TVA_STP	TVA	STP	E	0	0	1	1	0	0	0	0	1	0	0	1	1	0	0	0	0	1	1	0	1	0	0	1	0	0	1	1	0	0	1	1	0	1	0	0	1	0	0	1	1	1	0	0	0
TVA_STP_20	TVA_STP	TVA	STP	T	2	0	1	1	0	0	0	1	0	1	0	1	0	1	0	1	1	0	0	0	0	1	0	1	0	1	1	1	1	0	1	0	0	1	0	0	1	0	0	0	0	0	0	0	0
TVA_STP_21	TVA_STP	TVA	STP	H	1	1	0	1	0	0	1	0	1	1	0	1	0	0	0	1	1	0	0	0	1	1	1	0	1	0	1	0	0	0	1	1	0	1	1	0	1	0	0	0	0	1	0	1	1
TVA_STP_22	TVA_STP	TVA	STP	E	0	0	0	0	0	1	1	0	0	1	0	1	0	0	0	1	0	0	0	0	0	1	0	0	1	0	1	0	0	0	1	0	0	0	0	0	0	0	0	0	0	0	0	0	0
TVA_STP_23	TVA_STP	TVA	STP	H	1	1	1	1	0	1	0	1	1	1	0	1	0	0	0	1	0	0	0	1	0	1	0	0	1	0	1	1	0	1	1	1	0	1	0	0	0	0	0	1	1	1	0	0	0
TVA_STP_24	TVA_STP	TVA	STP	H	1	0	0	0	0	1	1	0	0	0	1	0	0	0	0	1	0	0	0	0	0	0	0	1	0	0	1	0	0	0	1	0	0	0	0	0	0	0	0	0	0	1	0	0	0
TVA_STP_25	TVA_STP	TVA	STP	E	0	1	0	0	0	0	0	0	0	0	0	0	0	0	0	0	0	0	0	0	0	0	0	0	0	0	1	0	0	0	0	0	0	0	0	0	0	0	0	0	0	1	0	0	1
TVA_STP_27	TVA_STP	TVA	STP	H	1	1	1	1	0	1	0	0	1	0	0	1	0	0	0	1	0	1	0	0	0	1	0	0	1	0	1	0	0	0	1	1	0	1	1	0	1	0	0	1	0	1	1	1	0
TVA_STP_28	TVA_STP	TVA	STP	H	1	1	0	0	0	1	0	0	1	0	0	1	0	0	0	0	1	0	0	0	0	0	0	1	1	0	1	0	0	0	1	1	0	1	1	0	1	0	0	0	1	1	1	1	0
TVA_STP_29	TVA_STP	TVA	STP	H	1	1	0	1	0	0	0	0	0	0	0	1	0	0	1	1	0	0	0	0	0	1	0	1	0	0	1	0	0	0	1	1	0	1	0	0	0	1	0	1	1	1	1	0	0
TVA_STP_30	TVA_STP	TVA	STP	E	0	0	0	0	0	0	0	0	0	0	0	0	0	0	0	1	0	0	0	0	0	0	0	1	0	0	1	0	0	0	1	1	1	1	0	1	0	1	1	0	1	1	0	1	0
Kar_Ref_04	KAR_REF	KAR	REF	T	2	0	0	1	0	0	0	1	1	1	0	0	0	0	0	1	0	0	0	0	0	0	0	1	0	0	1	0	0	0	1	1	0	1	0	0	0	1	0	0	1	1	0	1	1
Kar_Ref_05	KAR_REF	KAR	REF	NA	NA	1	0	1	1	0	1	0	1	1	1	1	0	0	0	1	1	0	1	0	0	1	0	1	1	0	1	0	0	0	1	1	0	1	0	0	1	1	0	0	0	0	0	0	0
Kar_Ref_06	KAR_REF	KAR	REF	NA	NA	0	1	1	0	0	1	0	1	1	0	1	0	1	1	0	1	0	1	0	1	1	0	1	1	1	1	1	0	0	1	1	0	1	0	0	1	1	0	0	1	1	0	1	0
Kar_Ref_07	KAR_REF	KAR	REF	E	0	0	0	1	0	1	0	0	0	0	0	1	0	0	0	1	0	0	1	0	1	0	0	1	0	0	1	0	0	0	1	1	0	1	0	0	0	0	0	0	1	0	1	0	0
Kar_Ref_08	KAR_REF	KAR	REF	E	0	0	0	0	0	0	0	0	0	0	0	1	0	0	0	1	0	0	0	0	0	0	0	0	0	0	1	0	0	0	1	0	1	1	0	0	0	0	0	0	1	0	0	1	0
Kar_Ref_09	KAR_REF	KAR	REF	NA	NA	1	0	1	0	0	1	0	0	1	0	0	1	0	0	1	1	0	0	0	0	1	0	0	1	0	1	0	0	0	1	0	0	1	0	0	0	1	0	0	0	1	0	0	0
Kar_Ref_10	KAR_REF	KAR	REF	E	0	0	0	0	0	0	0	0	0	0	0	1	0	0	0	1	0	0	0	0	1	0	0	0	0	1	1	0	0	0	0	0	0	1	0	0	0	0	0	1	0	0	0	0	0
Kar_Ref_11	KAR_REF	KAR	REF	H	1	1	0	1	0	0	1	1	1	1	0	1	0	0	0	1	0	0	1	0	0	1	1	0	1	0	1	0	0	0	1	0	1	1	0	0	0	0	0	0	0	1	0	1	0
Kar_Ref_12	KAR_REF	KAR	REF	H	1	0	1	1	1	1	0	0	1	0	1	1	0	0	0	1	1	1	1	0	1	1	0	0	1	0	1	0	0	0	0	1	1	1	1	0	1	1	0	0	1	0	0	1	0
Kar_Ref_13	KAR_REF	KAR	REF	H	1	0	0	1	0	0	0	1	0	0	0	1	0	0	0	0	1	0	0	0	0	0	0	1	0	0	1	0	0	0	1	0	0	1	0	0	0	0	0	0	0	1	0	1	0
Kar_Ref_14	KAR_REF	KAR	REF	NA	NA	1	0	0	0	1	0	0	1	1	0	1	0	0	0	0	0	1	0	1	1	1	0	1	1	0	1	0	0	0	1	1	0	1	1	0	0	0	0	1	1	1	0	1	0
Kar_Ref_15	KAR_REF	KAR	REF	NA	NA	0	1	1	0	0	0	1	0	1	0	1	0	0	0	1	0	0	0	0	0	1	0	1	1	1	1	0	0	0	1	0	0	1	0	0	0	1	0	0	0	0	0	1	0
Kar_Ref_16	KAR_REF	KAR	REF	T	2	0	0	1	0	0	1	1	1	1	0	1	0	0	0	1	1	0	0	0	0	1	0	0	1	0	1	0	0	0	0	0	0	1	0	0	1	1	0	0	0	0	1	0	0
Kar_Ref_17	KAR_REF	KAR	REF	E	0	1	1	1	0	1	0	1	1	0	1	1	0	0	0	1	0	0	0	1	0	1	1	1	0	0	1	0	0	0	1	1	0	1	0	0	1	0	0	0	1	0	0	1	0
Kar_Ref_18	KAR_REF	KAR	REF	E	0	1	1	1	0	1	1	0	0	0	0	1	0	1	0	1	0	0	0	0	0	0	1	1	0	0	1	1	0	0	0	1	1	1	0	0	0	1	1	0	0	1	0	0	0
Kar_Ref_19	KAR_REF	KAR	REF	H	1	0	0	0	0	1	0	0	1	0	0	1	0	0	0	1	0	0	0	0	0	0	0	0	0	0	1	0	0	0	1	0	0	0	0	0	0	0	0	1	0	0	1	0	0
Kar_Ref_20	KAR_REF	KAR	REF	H	1	1	0	1	0	1	1	1	1	0	1	1	0	0	0	1	1	1	0	0	0	0	0	1	1	0	0	0	0	0	1	0	0	1	0	0	0	0	0	0	0	0	0	0	0
Kar_Ref_21	KAR_REF	KAR	REF	NA	NA	1	1	1	0	0	1	1	1	1	0	1	0	1	0	1	1	0	0	1	1	1	0	0	1	1	1	0	0	0	1	0	1	1	1	0	1	1	0	0	0	1	0	1	1
Kar_Ref_22	KAR_REF	KAR	REF	H	1	0	0	0	0	0	0	1	0	1	0	0	0	0	1	1	0	0	0	0	0	0	0	0	0	0	1	0	0	0	0	1	0	0	0	0	0	0	0	0	1	1	0	0	1
Kar_Ref_23	KAR_REF	KAR	REF	E	0	0	0	0	0	0	0	0	0	0	0	0	0	1	1	1	0	0	0	0	0	0	0	1	0	0	1	0	0	0	0	1	0	0	0	0	0	0	0	0	1	1	1	0	1
Kar_Ref_24	KAR_REF	KAR	REF	NA	NA	0	0	1	0	0	0	0	0	1	0	1	0	0	0	1	0	0	0	0	0	1	0	1	0	0	1	0	0	1	1	1	0	1	0	1	0	0	0	0	0	1	1	0	0
Kar_Ref_25	KAR_REF	KAR	REF	E	0	1	0	1	0	0	0	0	1	0	0	0	0	0	0	1	0	0	0	0	0	0	0	0	0	0	1	0	0	0	0	1	0	1	0	0	0	0	0	0	0	1	0	0	1
Kar_Ref_26	KAR_REF	KAR	REF	H	1	0	0	0	0	0	0	0	0	0	0	0	0	0	0	1	0	0	0	0	0	0	0	0	0	0	1	0	0	0	0	0	0	1	0	0	0	0	0	0	0	0	0	1	0
Kar_Ref_27	KAR_REF	KAR	REF	E	0	0	1	0	0	0	1	0	1	0	0	1	0	0	0	1	1	0	1	0	0	1	1	1	0	0	1	0	0	0	1	1	1	1	0	0	0	1	0	1	0	1	0	1	0
Kar_Ref_28	KAR_REF	KAR	REF	E	0	0	0	0	0	0	0	1	0	1	0	1	0	0	0	0	0	0	0	0	0	1	0	1	0	0	1	0	0	0	1	1	1	1	1	0	0	0	0	0	1	1	0	1	0
Kar_Ref_29	KAR_REF	KAR	REF	E	0	0	0	0	0	0	0	0	0	0	1	1	0	0	0	1	1	0	0	0	0	1	0	0	0	0	1	0	0	0	1	1	1	0	0	1	0	0	0	0	0	0	0	0	0
Kar_Ref_30	KAR_REF	KAR	REF	E	0	1	0	1	0	0	0	0	1	1	0	1	0	0	1	0	0	1	1	0	0	1	0	1	0	0	1	0	0	0	1	1	0	1	0	0	0	1	0	0	0	0	0	1	0
Kar_STP_01	KAR_STP	KAR	STP	E	0	1	1	0	0	0	0	0	0	0	0	1	0	0	0	1	0	1	1	0	0	0	0	1	0	0	1	0	0	0	0	0	0	1	0	0	0	0	0	0	0	1	1	0	0
Kar_STP_03	KAR_STP	KAR	STP	H	1	0	1	1	0	0	0	0	0	0	1	1	0	0	0	1	0	0	0	0	0	0	0	0	0	0	1	0	0	0	1	1	0	0	0	0	0	0	0	0	0	0	1	0	0
Kar_STP_04	KAR_STP	KAR	STP	NA	NA	0	0	1	0	1	0	0	1	0	0	0	0	0	0	1	0	0	0	0	0	0	0	0	1	1	1	0	1	0	1	1	0	1	0	0	1	0	0	0	0	0	0	1	0
Kar_STP_08	KAR_STP	KAR	STP	NA	NA	0	0	1	0	1	0	1	0	0	0	0	0	0	0	1	0	1	0	0	1	1	1	0	1	0	1	0	0	0	1	0	0	1	0	0	0	0	0	0	0	0	0	0	0
Kar_STP_09	KAR_STP	KAR	STP	NA	NA	0	1	1	0	0	1	0	0	0	0	0	0	0	0	1	0	0	0	0	0	1	0	0	1	0	1	0	0	0	0	0	0	1	0	0	0	1	0	0	0	0	0	0	0
Kar_STP_10	KAR_STP	KAR	STP	H	1	1	0	0	0	0	0	0	0	0	0	0	0	0	0	1	0	0	0	0	0	0	0	0	0	0	1	0	0	0	0	1	0	1	0	0	0	0	0	0	0	1	0	0	0
Kar_STP_12	KAR_STP	KAR	STP	H	1	1	0	1	0	0	1	1	0	0	0	0	1	0	0	1	0	1	0	0	0	1	0	0	1	1	1	0	0	0	1	1	0	1	0	0	0	0	0	0	0	0	0	0	0
Kar_STP_13	KAR_STP	KAR	STP	H	1	0	1	0	0	0	1	0	1	0	0	1	0	0	0	0	1	0	0	0	0	0	0	0	1	0	1	0	0	0	1	1	0	1	0	0	0	0	0	0	1	0	1	0	0
Kar_STP_14	KAR_STP	KAR	STP	E	0	0	0	0	0	0	1	0	1	0	1	1	0	0	0	1	0	0	0	0	0	0	0	1	0	0	1	0	0	0	1	1	0	1	0	0	0	0	0	0	0	1	0	0	0
Kar_STP_15	KAR_STP	KAR	STP	H	1	1	1	1	0	1	0	0	1	0	0	1	0	0	0	1	0	0	1	0	0	1	0	1	0	0	1	1	0	0	1	1	0	1	1	0	0	0	0	0	0	1	1	0	0
Kar_STP_16	KAR_STP	KAR	STP	NA	NA	1	0	0	0	1	0	1	0	1	0	1	0	0	0	0	0	0	0	0	0	1	0	1	1	1	1	0	0	0	0	0	0	1	0	0	0	0	0	0	1	0	0	1	0
Kar_STP_17	KAR_STP	KAR	STP	H	1	0	0	1	0	0	1	0	0	0	0	1	0	0	1	1	1	0	0	0	0	0	0	0	0	0	1	1	0	0	1	0	0	1	0	0	0	0	0	1	0	0	0	0	0
Kar_STP_18	KAR_STP	KAR	STP	T	2	0	1	1	1	0	1	0	1	1	0	0	0	0	0	1	0	0	0	0	0	1	0	0	1	0	1	1	0	0	0	0	1	1	0	0	0	0	0	0	0	1	0	0	0
Kar_STP_19	KAR_STP	KAR	STP	H	1	0	0	1	0	0	1	0	0	0	0	1	0	1	0	1	0	0	0	0	1	1	0	0	1	0	1	0	0	1	1	1	0	1	0	0	0	1	0	0	1	1	0	1	0
Kar_STP_20	KAR_STP	KAR	STP	T	2	1	0	1	0	0	0	0	0	0	0	1	0	0	1	1	0	0	0	0	0	0	0	1	0	0	1	0	0	0	1	1	1	1	1	0	1	1	0	0	1	0	1	0	0
Kar_STP_21	KAR_STP	KAR	STP	NA	NA	1	0	1	0	0	1	1	1	0	1	0	1	1	0	1	0	1	1	0	1	1	0	1	1	0	1	1	1	0	1	1	1	1	1	0	1	0	0	1	0	1	1	1	1
Kar_STP_22	KAR_STP	KAR	STP	NA	NA	1	0	1	0	0	1	1	0	1	0	1	0	1	0	1	0	1	0	1	1	1	1	0	1	1	1	0	0	0	1	1	0	1	1	0	1	0	0	0	1	1	0	1	0
Kar_STP_23	KAR_STP	KAR	STP	E	0	1	0	0	0	0	1	0	1	1	0	1	0	0	0	1	0	0	1	0	0	0	0	1	0	0	1	1	0	0	1	1	0	1	0	1	0	0	0	1	0	1	1	0	0
Kar_STP_24	KAR_STP	KAR	STP	E	0	1	0	1	0	0	0	0	0	1	1	0	0	0	0	1	0	0	0	0	1	1	0	0	1	0	1	0	0	0	1	0	0	0	0	0	0	0	0	0	0	1	0	0	0
Kar_STP_25	KAR_STP	KAR	STP	NA	NA	0	0	1	0	1	0	0	0	1	0	0	0	0	0	0	0	0	0	0	1	1	0	0	0	0	1	0	0	0	1	1	0	0	0	0	0	0	0	0	0	0	0	0	0
Kar_STP_26	KAR_STP	KAR	STP	T	2	0	0	1	0	0	0	0	1	0	0	1	0	0	0	0	1	0	0	0	0	1	0	0	0	0	1	0	0	0	1	1	0	1	0	1	0	0	0	0	1	0	0	1	0
Kar_STP_27	KAR_STP	KAR	STP	H	1	0	1	1	0	1	1	0	1	0	0	1	1	0	0	1	1	1	0	0	0	1	0	1	1	0	1	0	0	0	1	1	0	1	0	0	0	0	0	0	0	1	0	0	0
Kar_STP_28	KAR_STP	KAR	STP	E	0	0	0	1	0	0	0	0	0	0	0	0	0	0	0	1	1	0	0	0	0	0	0	0	0	0	1	0	0	0	1	1	0	0	0	0	0	0	0	0	0	1	0	1	0
Kar_STP_29	KAR_STP	KAR	STP	NA	NA	0	1	1	0	0	1	1	0	1	0	0	1	0	0	1	0	0	0	0	0	1	0	0	1	1	1	0	0	0	1	0	0	1	0	0	0	1	0	1	0	1	0	1	0
Kar_STP_30	KAR_STP	KAR	STP	NA	NA	1	0	1	0	0	0	0	0	1	0	0	0	0	0	0	0	0	0	0	0	0	0	1	0	0	1	0	0	0	0	0	0	0	0	0	0	0	0	0	0	1	0	0	1
GDA_Ref_01	GDA_REF	GDA	REF	E	0	0	1	1	0	0	1	0	0	1	0	1	0	0	0	1	0	0	0	0	0	0	0	0	1	0	1	0	0	0	1	0	1	1	0	1	0	0	0	0	0	1	0	0	0
GDA_Ref_02	GDA_REF	GDA	REF	H	1	1	1	1	0	1	0	1	1	0	0	1	0	0	0	1	1	0	0	0	1	1	0	0	1	1	1	1	0	0	0	1	0	1	0	0	0	0	0	0	0	0	0	1	0
GDA_Ref_03	GDA_REF	GDA	REF	E	0	1	0	1	0	1	1	0	0	0	0	1	0	1	0	1	0	0	0	0	1	1	0	0	1	0	1	0	0	0	1	0	0	1	0	0	0	0	0	0	0	1	0	0	0
GDA_Ref_04	GDA_REF	GDA	REF	E	0	1	1	1	0	1	0	1	0	0	1	1	0	0	0	1	0	0	0	0	0	1	1	1	0	0	1	1	0	0	1	1	0	1	0	0	0	0	0	0	1	1	0	0	0
GDA_Ref_05	GDA_REF	GDA	REF	T	2	0	0	1	0	0	0	0	1	0	0	1	0	0	0	0	0	0	0	0	0	0	0	1	0	0	1	0	0	0	1	1	0	1	0	0	0	0	0	0	0	1	0	1	0
GDA_Ref_06	GDA_REF	GDA	REF	H	1	0	1	1	0	1	1	0	1	0	0	0	0	0	0	0	0	0	1	0	0	0	0	1	0	0	1	0	0	0	1	1	0	1	0	0	1	0	0	0	1	1	0	0	0
GDA_Ref_07	GDA_REF	GDA	REF	E	0	0	0	1	0	0	0	0	1	0	0	1	0	0	0	1	0	0	0	0	0	1	0	0	0	0	1	0	1	0	1	1	0	0	1	0	1	0	0	0	0	1	1	0	0
GDA_Ref_08	GDA_REF	GDA	REF	H	1	1	0	1	0	0	0	0	0	0	0	1	0	0	0	1	0	0	1	0	0	0	0	0	0	0	1	1	0	0	1	1	0	1	0	0	0	0	0	1	0	1	0	0	0
GDA_Ref_09	GDA_REF	GDA	REF	H	1	0	1	1	0	0	1	0	1	1	1	1	0	0	0	1	0	1	1	0	0	1	0	0	1	0	1	0	0	0	1	0	1	1	0	0	1	1	0	0	0	1	0	0	0
GDA_Ref_10	GDA_REF	GDA	REF	H	1	1	0	1	1	0	0	0	1	1	0	0	0	0	0	0	0	1	0	0	0	1	0	0	1	0	1	0	0	1	1	1	0	0	0	0	0	0	0	0	1	1	0	0	0
GDA_Ref_11	GDA_REF	GDA	REF	E	0	0	1	1	0	1	0	0	0	1	1	0	0	0	0	1	1	0	0	0	0	0	0	0	1	1	1	0	1	0	0	0	0	1	1	0	0	1	0	0	0	1	0	1	0
GDA_Ref_12	GDA_REF	GDA	REF	H	1	0	0	0	0	0	0	0	0	0	0	1	0	0	1	1	1	0	0	0	0	0	0	1	0	0	1	0	0	1	1	0	1	1	1	0	0	0	0	0	0	1	0	0	0
GDA_Ref_13	GDA_REF	GDA	REF	E	0	0	1	1	0	1	0	0	0	0	1	1	0	0	0	1	0	1	0	0	0	0	0	1	0	0	1	0	0	1	1	0	0	1	0	0	0	0	0	0	1	1	1	0	0
GDA_Ref_14	GDA_REF	GDA	REF	H	1	0	0	1	0	1	0	1	1	0	0	1	0	0	0	1	1	0	0	0	0	1	0	1	0	0	1	1	1	0	1	1	1	1	0	0	0	0	0	0	0	1	1	0	0
GDA_Ref_15	GDA_REF	GDA	REF	T	2	0	1	0	0	0	0	0	1	0	0	0	0	0	0	0	0	0	0	0	1	1	0	1	0	0	1	0	0	0	1	1	0	1	0	0	1	0	1	0	1	0	0	0	0
GDA_Ref_16	GDA_REF	GDA	REF	E	0	0	0	1	0	0	1	0	1	0	0	0	0	0	0	1	0	0	1	0	1	1	0	1	0	0	1	0	0	0	1	1	1	1	1	1	0	0	0	1	1	1	0	0	0
GDA_Ref_17	GDA_REF	GDA	REF	H	1	0	1	0	0	0	0	1	1	0	0	0	0	0	1	1	0	0	1	0	0	0	0	0	1	0	1	1	0	0	1	1	1	1	1	0	0	1	0	0	0	0	1	0	0
GDA_Ref_18	GDA_REF	GDA	REF	H	1	1	0	0	0	0	0	0	0	0	0	1	0	0	0	1	0	0	0	0	0	0	0	0	0	0	1	0	0	0	1	1	0	0	0	0	0	0	0	0	1	1	0	0	0
GDA_Ref_19	GDA_REF	GDA	REF	E	0	0	1	1	0	0	1	0	0	0	1	0	0	0	0	1	0	0	0	0	1	1	0	0	1	1	1	0	0	0	1	1	0	0	0	0	0	0	0	0	0	1	0	0	0
GDA_Ref_20	GDA_REF	GDA	REF	T	2	0	0	1	0	1	0	0	0	1	0	1	0	1	0	1	0	0	0	0	1	1	1	1	0	0	0	0	0	0	1	1	0	1	0	0	0	0	0	0	0	1	1	0	0
GDA_Ref_21	GDA_REF	GDA	REF	H	1	0	1	1	0	1	0	1	1	1	0	0	1	0	0	1	1	0	0	0	0	1	1	1	1	1	1	0	0	0	1	1	0	1	0	0	0	0	0	0	0	0	1	1	0
GDA_Ref_22	GDA_REF	GDA	REF	E	0	0	1	1	0	0	1	1	0	1	0	1	0	0	1	0	0	0	0	0	0	0	0	0	0	0	1	0	0	0	1	1	1	1	0	0	0	0	0	0	1	1	0	0	0
GDA_Ref_23	GDA_REF	GDA	REF	E	0	0	0	1	0	1	0	1	0	0	0	1	0	0	0	0	0	0	0	0	0	0	0	1	1	0	1	0	1	0	1	1	1	0	0	0	1	0	0	0	0	1	0	1	0
GDA_Ref_24	GDA_REF	GDA	REF	E	0	1	1	0	0	0	0	1	1	0	1	0	1	1	0	1	0	1	0	1	0	0	0	0	1	0	1	0	0	0	1	0	0	1	0	0	1	0	0	0	1	0	0	0	0
GDA_Ref_25	GDA_REF	GDA	REF	E	0	0	0	0	0	0	0	0	0	0	0	0	0	0	0	0	1	0	0	0	0	0	0	0	1	0	1	0	0	0	1	1	0	1	1	0	1	0	0	1	0	1	1	0	0
GDA_Ref_26	GDA_REF	GDA	REF	E	0	1	0	1	0	0	0	0	1	0	1	0	0	0	0	0	0	0	1	0	0	0	1	1	0	0	1	1	0	0	1	0	1	1	0	1	0	1	0	0	1	1	1	0	0
GDA_Ref_27	GDA_REF	GDA	REF	H	1	0	0	0	0	0	1	0	1	0	0	1	0	0	0	1	1	0	0	0	0	0	0	0	0	0	1	1	0	0	1	0	1	1	0	0	1	1	0	0	0	0	1	0	0
GDA_Ref_28	GDA_REF	GDA	REF	H	1	0	0	0	0	0	0	0	0	0	0	0	0	0	0	1	0	0	0	0	0	0	0	0	0	0	1	0	0	0	0	1	0	1	0	0	0	0	0	0	0	1	0	0	0
GDA_Ref_29	GDA_REF	GDA	REF	E	0	0	0	1	0	0	0	0	0	0	0	1	0	0	0	1	0	0	1	0	0	1	0	1	0	0	1	1	0	0	1	1	0	1	0	0	1	0	0	0	0	1	0	0	0
GDA_Ref_30	GDA_REF	GDA	REF	H	1	0	0	0	0	1	0	0	0	0	0	0	0	0	0	1	1	0	0	0	0	0	0	0	0	0	1	0	0	0	0	1	0	1	0	0	0	0	0	0	1	1	0	0	0
GDA_STP_01	GDA_STP	GDA	STP	NA	NA	1	1	1	0	1	1	0	0	0	0	0	0	0	0	1	0	1	0	0	0	0	0	1	1	0	1	0	0	0	1	0	1	1	0	0	0	0	0	0	0	0	0	0	0
GDA_STP_02	GDA_STP	GDA	STP	T	2	0	1	1	0	0	1	1	0	1	0	0	0	0	0	1	0	0	0	0	1	1	0	0	1	0	1	1	0	0	1	1	0	1	0	0	0	0	0	0	1	1	0	1	0
GDA_STP_03	GDA_STP	GDA	STP	H	1	0	0	1	0	0	0	1	1	0	0	1	0	0	0	0	1	0	0	0	1	0	0	1	1	0	1	0	0	0	1	1	0	1	1	0	0	0	0	0	0	1	0	0	0
GDA_STP_04	GDA_STP	GDA	STP	E	0	0	0	1	0	0	0	0	0	0	0	1	0	0	0	1	1	0	0	0	0	0	0	0	0	0	1	0	0	0	1	0	0	1	0	0	1	0	0	0	0	0	0	0	0
GDA_STP_05	GDA_STP	GDA	STP	H	1	0	0	1	0	0	0	1	1	0	0	1	0	0	0	1	0	0	0	0	0	0	0	1	0	0	1	0	0	0	1	1	0	0	0	0	0	0	0	0	1	1	0	1	0
GDA_STP_06	GDA_STP	GDA	STP	H	1	0	1	1	0	0	1	1	1	0	1	1	1	0	0	1	0	0	1	1	0	1	0	1	1	1	1	0	0	1	1	0	0	1	1	0	0	1	0	0	1	1	0	1	0
GDA_STP_07	GDA_STP	GDA	STP	E	0	0	1	1	0	1	0	0	0	0	0	1	0	0	0	1	0	0	0	0	0	0	0	0	0	0	1	1	0	0	1	1	0	1	0	0	0	0	0	0	1	1	1	1	0
GDA_STP_08	GDA_STP	GDA	STP	E	0	0	0	1	0	0	0	0	1	1	0	1	0	0	0	0	0	0	0	1	1	1	0	1	0	0	1	1	0	0	1	1	0	1	0	0	1	0	0	0	1	0	0	0	0
GDA_STP_09	GDA_STP	GDA	STP	E	0	1	0	0	1	0	1	0	1	1	0	1	0	0	0	1	0	1	1	0	1	1	0	1	1	0	1	0	0	0	1	1	0	1	0	0	0	0	0	0	0	0	1	0	0
GDA_STP_10	GDA_STP	GDA	STP	H	1	1	0	0	0	0	0	0	1	1	0	0	0	0	0	1	0	1	0	0	0	1	0	0	0	0	1	0	0	0	1	0	0	1	0	0	0	1	0	0	0	0	0	0	0
GDA_STP_11	GDA_STP	GDA	STP	E	0	0	0	1	0	1	0	1	1	0	0	1	0	0	0	0	0	0	1	0	0	1	0	1	0	0	1	0	0	0	1	1	0	1	0	0	0	0	0	1	0	1	0	0	0
GDA_STP_12	GDA_STP	GDA	STP	T	2	0	0	1	0	0	0	0	0	0	0	0	0	0	0	1	0	0	0	0	0	0	0	0	0	0	1	0	1	0	1	1	0	0	0	0	0	0	0	0	1	1	0	0	0
GDA_STP_13	GDA_STP	GDA	STP	T	2	1	0	0	0	0	0	0	0	0	0	1	0	0	0	1	0	0	1	0	0	0	0	1	0	1	1	0	0	0	1	1	0	1	0	0	0	0	0	0	0	0	1	1	0
GDA_STP_14	GDA_STP	GDA	STP	E	0	0	0	1	0	0	0	0	1	0	0	1	0	1	0	1	1	0	1	0	0	1	0	1	0	0	1	0	0	0	1	1	0	1	0	0	0	1	1	0	0	1	0	0	0
GDA_STP_15	GDA_STP	GDA	STP	T	2	0	0	0	0	0	0	0	0	0	1	1	0	0	0	0	1	0	1	1	0	0	0	1	0	0	1	0	0	0	1	0	1	1	0	0	1	0	0	1	0	0	0	0	0
GDA_STP_16	GDA_STP	GDA	STP	T	2	0	0	1	0	0	0	0	0	1	0	0	0	0	0	0	0	0	0	0	0	0	0	0	1	0	0	0	0	0	1	0	1	1	0	0	0	1	0	1	1	0	0	0	0
GDA_STP_17	GDA_STP	GDA	STP	T	2	1	1	1	0	1	1	1	1	1	0	1	0	0	0	1	1	0	1	0	0	1	0	0	1	0	1	0	1	0	1	1	0	1	1	0	1	0	0	0	1	1	0	1	1
GDA_STP_18	GDA_STP	GDA	STP	E	0	1	1	0	0	0	1	1	1	1	0	1	0	0	0	1	0	0	0	1	0	1	0	0	1	0	1	0	1	0	1	1	0	1	1	0	0	0	0	0	0	1	0	0	0
GDA_STP_19	GDA_STP	GDA	STP	H	1	0	0	1	0	1	0	0	1	0	0	0	0	0	0	1	1	0	0	0	0	1	1	1	0	0	1	0	0	0	1	1	1	1	0	1	0	0	0	1	0	1	1	1	0
GDA_STP_21	GDA_STP	GDA	STP	E	0	1	1	1	0	1	1	0	1	1	0	1	0	0	0	1	1	0	1	1	1	1	0	0	1	1	1	0	0	0	1	1	0	1	1	0	0	0	0	0	0	1	0	1	0
GDA_STP_22	GDA_STP	GDA	STP	H	1	0	1	1	0	0	1	0	0	1	0	1	0	0	0	1	0	0	1	1	1	1	0	1	1	0	1	1	0	0	1	1	0	1	0	0	1	0	0	0	0	1	0	0	0
GDA_STP_23	GDA_STP	GDA	STP	T	2	0	1	0	0	1	1	0	0	0	0	0	0	0	0	1	0	0	0	0	0	1	0	0	1	0	1	0	0	0	1	0	0	0	0	0	0	0	0	0	0	0	0	0	0
GDA_STP_24	GDA_STP	GDA	STP	E	0	0	1	0	0	1	1	0	0	0	0	0	0	0	0	1	0	0	0	0	0	1	0	0	1	0	1	0	0	0	1	0	0	0	0	0	0	0	0	0	0	0	0	0	0
GDA_STP_25	GDA_STP	GDA	STP	T	2	0	0	1	0	1	0	0	0	0	0	1	0	0	0	1	0	0	0	0	0	0	0	0	1	0	1	0	0	0	1	0	0	1	0	0	0	0	0	0	0	0	0	0	0
GDA_STP_26	GDA_STP	GDA	STP	E	0	1	0	1	0	1	0	0	1	0	0	0	0	0	0	1	0	1	0	0	0	0	0	1	1	0	1	0	0	0	1	0	0	0	0	0	0	0	0	0	1	1	0	0	0
GDA_STP_27	GDA_STP	GDA	STP	H	1	1	1	1	1	0	0	0	0	0	1	0	0	0	0	1	0	0	0	0	0	0	0	0	1	0	1	1	0	0	1	1	0	0	0	0	1	1	0	0	0	1	0	0	0
GDA_STP_28	GDA_STP	GDA	STP	H	1	0	0	0	0	0	0	1	0	0	0	0	0	0	0	0	0	0	1	0	1	1	0	1	0	0	1	0	0	0	1	1	0	1	0	1	0	1	0	0	1	1	0	0	0
GDA_STP_29	GDA_STP	GDA	STP	E	0	1	1	0	0	1	0	0	0	0	0	1	0	0	0	0	0	1	0	0	0	1	0	0	0	0	1	0	0	0	0	0	0	1	0	1	0	0	0	0	0	1	0	0	0
GDA_STP_30	GDA_STP	GDA	STP	H	1	0	0	1	1	1	0	0	0	1	0	1	0	0	0	1	0	0	0	0	0	0	0	0	0	0	1	0	0	0	0	0	0	1	0	0	0	0	0	0	0	1	0	0	1
KRI_Ref_01	KRI_REF	KRI	REF	NA	NA	1	0	1	0	0	1	0	1	1	1	1	0	0	0	1	0	1	1	0	1	1	0	0	1	1	1	0	0	0	1	1	0	1	1	0	1	0	0	0	1	0	1	0	1
KRI_Ref_02	KRI_REF	KRI	REF	E	0	1	1	1	0	1	0	1	0	0	0	1	0	0	0	1	0	0	1	1	0	1	0	1	1	0	0	0	0	1	0	0	1	1	0	0	1	1	0	0	1	0	1	0	0
KRI_Ref_03	KRI_REF	KRI	REF	E	0	1	1	1	0	0	1	0	0	0	0	0	0	1	0	1	0	1	0	1	0	1	1	0	1	1	0	0	0	0	0	1	0	0	0	0	1	0	0	0	0	0	1	0	0
KRI_Ref_05	KRI_REF	KRI	REF	E	0	1	1	1	0	0	0	1	1	1	0	1	0	0	0	1	0	1	1	0	0	1	0	0	1	0	1	1	0	0	1	0	0	1	0	1	0	1	0	0	0	1	0	0	0
KRI_Ref_06	KRI_REF	KRI	REF	E	0	0	0	1	0	0	0	1	0	1	0	1	0	1	0	1	0	0	0	0	0	0	0	0	0	0	0	0	0	0	0	0	0	0	0	1	0	0	0	1	1	0	0	0	1
KRI_Ref_07	KRI_REF	KRI	REF	E	0	1	0	1	0	0	1	0	1	1	1	1	0	1	0	0	0	1	1	0	1	1	0	0	1	1	1	1	0	0	1	1	0	1	1	0	1	1	0	1	0	0	1	0	1
KRI_Ref_08	KRI_REF	KRI	REF	E	0	0	0	1	0	0	1	0	1	1	0	0	0	1	0	1	0	0	0	0	0	1	0	0	1	1	0	0	0	0	0	1	1	1	0	0	0	1	0	0	0	0	0	0	0
KRI_Ref_09	KRI_REF	KRI	REF	NA	NA	1	0	1	0	1	0	1	0	1	0	0	0	0	1	1	1	1	0	0	1	0	0	1	1	0	1	0	0	0	1	1	0	1	1	1	1	0	0	0	0	0	0	1	0
KRI_Ref_11	KRI_REF	KRI	REF	E	0	0	0	1	0	0	0	0	1	0	0	0	0	0	0	1	0	0	1	0	0	0	0	0	0	1	0	0	0	1	0	1	0	0	0	0	1	0	0	1	0	0	0	0	1
KRI_Ref_12	KRI_REF	KRI	REF	E	0	0	0	1	1	0	0	0	1	0	0	0	0	0	0	1	0	0	0	0	0	0	1	1	0	0	1	0	1	0	1	0	0	1	0	1	0	0	0	1	0	0	0	0	0
KRI_Ref_13	KRI_REF	KRI	REF	NA	NA	0	1	1	0	1	1	0	1	1	1	1	1	1	0	1	0	0	1	0	0	1	0	1	1	0	0	0	0	0	0	1	0	0	0	0	0	0	0	0	0	0	0	0	0
KRI_Ref_14	KRI_REF	KRI	REF	E	0	0	1	1	0	0	0	0	1	0	0	1	1	0	0	0	0	0	0	0	0	1	0	0	0	0	0	1	0	0	0	0	0	1	0	1	0	0	0	0	0	0	0	0	0
KRI_Ref_15	KRI_REF	KRI	REF	E	0	1	0	1	0	1	1	1	0	1	0	1	0	1	0	1	0	1	1	0	1	1	1	1	0	1	1	0	0	0	1	1	0	1	0	0	1	0	0	1	0	1	0	0	0
KRI_Ref_16	KRI_REF	KRI	REF	NA	NA	1	0	1	0	0	0	0	1	1	0	1	0	0	0	1	0	0	1	0	0	0	0	0	1	0	1	1	0	0	0	1	0	0	0	0	1	0	0	0	0	1	0	1	0
KRI_Ref_17	KRI_REF	KRI	REF	E	0	1	1	1	0	1	1	0	0	0	0	0	0	0	1	0	0	0	0	0	1	0	0	1	0	0	0	0	0	0	1	1	0	0	0	0	0	0	0	0	0	0	0	0	0
KRI_Ref_18	KRI_REF	KRI	REF	E	0	1	0	1	0	0	0	0	1	1	0	1	0	0	0	1	0	0	0	0	0	0	0	0	1	1	0	0	1	0	0	0	0	0	1	0	0	0	0	0	0	0	0	0	1
KRI_Ref_19	KRI_REF	KRI	REF	E	0	1	1	1	0	0	0	0	1	0	0	0	0	1	0	1	1	0	0	0	0	0	1	0	0	1	0	1	0	0	1	0	0	1	0	1	1	0	0	0	0	0	0	0	1
KRI_Ref_20	KRI_REF	KRI	REF	H	1	0	1	1	0	1	0	1	1	0	0	0	0	0	0	1	0	0	0	0	0	0	1	0	1	0	0	0	0	0	0	0	0	1	0	0	0	1	0	0	1	1	0	0	0
KRI_Ref_21	KRI_REF	KRI	REF	E	0	0	1	0	0	0	0	1	1	0	0	0	1	1	0	1	1	0	0	1	1	1	0	0	0	1	0	1	0	0	1	0	0	0	1	1	1	1	0	0	0	0	0	0	0
KRI_Ref_22	KRI_REF	KRI	REF	E	0	0	0	1	0	1	1	0	0	1	0	0	0	0	0	1	1	0	1	0	1	0	1	1	1	0	0	1	0	0	1	1	1	1	0	1	1	1	0	0	0	0	0	0	1
KRI_Ref_23	KRI_REF	KRI	REF	E	0	0	1	1	0	1	0	0	1	1	0	1	0	0	0	1	0	0	0	0	0	1	1	0	0	0	0	1	0	0	1	1	0	1	0	1	0	1	1	0	0	1	0	0	0
KRI_Ref_24	KRI_REF	KRI	REF	E	0	0	1	0	0	1	1	0	1	1	0	0	0	0	0	1	0	0	1	0	0	0	0	0	0	1	0	1	0	0	1	1	0	1	0	1	1	1	1	0	0	0	1	0	0
KRI_Ref_25	KRI_REF	KRI	REF	E	0	0	0	1	0	1	0	1	1	1	0	1	0	0	0	1	0	0	0	0	0	1	0	0	0	0	0	1	0	0	1	1	0	1	0	1	1	1	0	1	0	0	1	1	1
KRI_Ref_26	KRI_REF	KRI	REF	NA	NA	1	0	1	0	0	0	0	0	0	0	0	0	0	0	0	0	0	0	0	0	0	0	0	0	0	1	1	0	0	0	0	0	1	1	0	0	0	0	0	0	0	0	0	0
KRI_Ref_27	KRI_REF	KRI	REF	E	0	0	0	0	0	0	0	0	0	0	0	0	0	1	0	1	0	0	0	0	0	0	0	0	0	0	0	0	0	0	0	0	0	0	0	0	0	0	0	0	0	0	0	0	0
KRI_Ref_28	KRI_REF	KRI	REF	E	0	1	0	1	0	0	0	0	0	0	0	0	0	0	0	0	0	0	0	0	0	0	0	0	0	0	1	1	0	0	1	0	1	1	0	0	0	0	0	0	0	0	0	0	0
KRI_Ref_29	KRI_REF	KRI	REF	E	0	0	1	1	0	0	1	1	1	0	0	0	0	0	0	1	0	0	0	1	0	0	0	0	0	1	0	0	1	0	1	0	1	0	1	0	1	0	1	0	0	0	0	0	0
KRI_Ref_30	KRI_REF	KRI	REF	E	0	1	0	1	0	0	1	1	0	1	0	1	0	1	0	1	0	0	1	0	1	1	0	0	0	0	1	0	0	0	1	0	1	1	0	0	0	1	0	1	0	0	0	0	0
KRI_STP_01	KRI_STP	KRI	STP	E	0	1	1	1	1	0	0	0	1	0	0	1	0	0	0	0	0	0	0	0	0	1	0	1	1	1	0	0	0	1	0	0	0	1	1	1	0	0	0	0	0	1	1	0	0
KRI_STP_02	KRI_STP	KRI	STP	E	0	1	1	0	0	0	0	1	0	0	0	0	0	0	1	1	0	0	0	0	0	0	0	0	1	0	1	0	0	0	1	1	0	0	0	0	0	0	0	0	0	0	0	0	0
KRI_STP_05	KRI_STP	KRI	STP	E	0	0	1	1	0	0	0	0	0	0	1	0	0	0	0	1	0	1	0	0	1	1	0	1	1	1	0	0	0	0	1	1	0	1	0	1	1	0	0	1	0	0	1	1	1
KRI_STP_06	KRI_STP	KRI	STP	E	0	1	1	1	0	1	0	1	1	1	1	1	0	0	1	1	0	1	1	0	1	0	1	1	1	0	0	1	0	0	1	1	1	0	0	0	1	1	0	0	0	0	0	1	0
KRI_STP_07	KRI_STP	KRI	STP	E	0	1	0	1	0	1	1	0	1	1	0	0	0	1	0	1	0	1	1	1	0	1	0	0	1	1	0	0	0	0	1	0	1	0	0	1	1	0	0	0	0	0	1	1	1
KRI_STP_08	KRI_STP	KRI	STP	E	0	0	0	1	0	0	1	0	1	1	0	0	0	0	0	1	0	0	0	0	0	1	1	0	0	0	0	0	0	0	0	0	0	0	0	0	0	0	0	0	0	0	0	0	0
KRI_STP_09	KRI_STP	KRI	STP	E	0	0	1	1	0	0	0	0	1	0	0	0	0	1	0	1	0	0	0	0	1	0	0	0	0	0	0	1	0	0	0	0	0	0	0	0	0	0	0	0	1	0	0	1	0
KRI_STP_10	KRI_STP	KRI	STP	NA	NA	1	1	0	0	1	1	0	1	1	0	0	0	0	0	1	0	0	1	0	0	0	0	0	1	0	0	0	0	0	1	0	1	0	1	0	1	0	0	0	0	0	1	0	0
KRI_STP_11	KRI_STP	KRI	STP	E	0	1	0	1	0	0	0	0	1	0	0	1	0	0	0	1	0	1	0	0	0	1	0	0	0	0	0	0	0	0	0	1	0	0	0	0	0	0	0	0	0	0	0	1	0
KRI_STP_12	KRI_STP	KRI	STP	E	0	0	1	1	0	0	0	0	1	0	0	0	0	0	0	1	0	0	0	0	0	0	0	0	1	0	0	0	0	0	0	0	0	0	0	1	0	0	0	0	0	0	0	0	0
KRI_STP_13	KRI_STP	KRI	STP	E	0	1	0	1	0	1	1	0	1	1	1	1	0	0	0	1	0	0	1	1	0	1	0	1	0	1	1	0	0	0	1	1	0	1	0	0	1	1	0	0	0	0	0	0	1
KRI_STP_14	KRI_STP	KRI	STP	E	0	0	0	1	0	1	0	0	1	0	0	0	0	1	0	0	0	0	0	0	1	0	0	0	1	0	0	0	0	0	0	0	1	0	0	0	0	0	0	0	1	0	0	0	0
KRI_STP_15	KRI_STP	KRI	STP	E	0	0	0	1	0	0	0	0	1	1	0	1	0	0	0	1	0	0	1	0	0	0	0	0	1	0	1	0	0	1	0	1	0	0	0	0	1	0	1	0	1	0	0	0	0
KRI_STP_16	KRI_STP	KRI	STP	E	0	1	0	1	0	0	1	0	0	0	0	0	0	0	0	1	1	0	0	0	0	1	0	0	0	0	0	0	0	1	0	1	1	0	0	1	0	1	0	0	0	0	0	1	0
KRI_STP_17	KRI_STP	KRI	STP	E	0	0	0	1	0	0	0	1	0	1	0	1	0	0	0	1	0	0	0	0	1	1	0	0	0	0	0	0	0	1	0	0	1	0	0	0	1	1	0	1	0	0	1	1	0
KRI_STP_18	KRI_STP	KRI	STP	E	0	0	0	1	0	0	1	1	1	1	0	0	0	0	0	1	0	0	0	0	0	0	0	0	1	0	0	0	0	0	0	0	0	1	0	1	0	0	1	0	0	0	0	1	0
KRI_STP_19	KRI_STP	KRI	STP	E	0	0	0	1	0	0	1	1	0	1	1	0	0	0	0	1	0	0	1	0	1	1	0	1	0	0	0	0	0	0	1	0	0	0	0	0	1	1	0	1	0	0	0	0	0
KRI_STP_21	KRI_STP	KRI	STP	E	0	0	1	1	0	0	0	0	1	1	0	0	0	0	0	1	0	1	0	0	1	1	0	0	0	0	0	1	0	0	1	0	1	0	0	1	1	1	0	0	0	0	0	0	1
KRI_STP_22	KRI_STP	KRI	STP	E	0	1	0	0	0	1	1	0	1	0	0	0	0	1	0	1	0	0	1	0	0	0	0	0	0	0	0	0	0	0	1	0	0	1	0	0	0	1	0	1	1	0	0	0	0
KRI_STP_23	KRI_STP	KRI	STP	NA	NA	0	0	1	0	0	0	0	1	0	0	0	0	0	0	1	0	0	0	0	0	0	0	0	1	1	0	0	0	0	0	0	0	1	0	1	1	1	0	0	0	1	0	0	1
KRI_STP_24	KRI_STP	KRI	STP	NA	NA	0	0	1	0	0	1	1	1	0	1	0	0	0	0	1	1	0	0	0	0	0	1	0	1	0	0	0	0	0	0	1	0	1	0	0	0	0	0	0	0	0	0	0	0
KRI_STP_25	KRI_STP	KRI	STP	E	0	0	0	0	0	0	0	0	0	0	0	0	0	0	0	1	0	0	0	0	0	0	0	0	0	0	0	0	0	0	0	1	1	0	0	0	0	0	0	1	0	0	0	0	0
KRI_STP_26	KRI_STP	KRI	STP	E	0	0	0	1	0	0	1	0	1	1	0	1	0	0	0	1	0	0	0	0	0	0	0	0	0	1	0	0	0	0	1	0	1	0	0	1	1	1	0	1	0	0	0	0	0
KRI_STP_28	KRI_STP	KRI	STP	E	0	0	1	1	1	0	0	0	1	0	0	0	0	1	0	0	0	0	1	0	0	0	0	0	0	0	0	0	0	0	1	0	0	1	0	1	0	1	0	1	1	0	0	1	1
KRI_STP_29	KRI_STP	KRI	STP	E	0	1	0	1	0	0	1	0	0	0	0	0	0	0	0	1	0	0	0	0	0	0	0	0	0	0	0	0	0	0	1	0	1	1	0	0	0	0	0	0	0	0	0	0	1
KRI_STP_30	KRI_STP	KRI	STP	E	0	0	1	0	0	0	0	0	1	0	0	0	1	0	0	1	0	0	0	0	0	1	0	0	1	1	0	1	0	0	1	0	0	0	0	1	1	1	0	1	0	0	0	0	0
[truncated: 310 more columns]

## Sheet: STP_REF_BP
SAMPLE	SITE	LOCATION	POLLUTION_TYPE	SPECIES	TROSSULUS	PrimH_1	PrimH_2	PrimH_3	PrimH_4	PrimH_5	PrimH_6	PrimH_7	PrimH_8	PrimH_9	PrimH_10	PrimH_13	PrimH_14	PrimH_18	PrimH_19	PrimH_21	PrimH_22	PrimH_23	PrimH_24	PrimH_25	PrimH_26	PrimH_27	PrimH_28	PrimH_29	PrimH_30	PrimH_31	PrimH_33	PrimH_35	PrimH_37	PrimH_38	PrimH_39	PrimH_40	PrimH_41	PrimH_42	PrimH_43	PrimH_44	PrimH_45	PrimH_46	PrimH_48	PrimH_49	PrimH_50	PrimH_51	PrimH_52	PrimH_54	PrimH_55
Ask_Ref_01	ASK_REF	ASK	REF	H	1	1	0	0	0	1	0	1	0	1	0	0	0	0	0	0	1	0	0	0	1	1	0	1	1	0	1	1	0	0	1	0	1	1	0	1	1	0	0	0	0	0	0	0	0
Ask_Ref_02	ASK_REF	ASK	REF	E	0	1	1	1	0	1	0	0	1	1	0	1	1	0	0	0	0	0	1	0	1	1	0	1	1	0	1	0	0	0	1	0	0	1	1	0	1	0	0	1	1	0	0	0	0
Ask_Ref_03	ASK_REF	ASK	REF	H	1	1	1	1	0	0	0	1	1	0	0	0	0	1	1	1	0	0	0	0	0	1	0	0	1	0	1	0	0	0	1	1	0	0	0	0	0	0	0	1	1	0	0	1	0
Ask_Ref_04	ASK_REF	ASK	REF	H	1	1	0	1	0	1	1	0	0	1	0	1	0	0	0	0	0	0	0	0	1	0	0	1	1	0	1	1	0	0	1	1	0	0	0	0	0	1	0	0	0	1	0	0	1
Ask_Ref_06	ASK_REF	ASK	REF	E	0	0	0	0	0	0	0	0	1	1	0	0	0	1	0	1	0	0	0	0	0	0	0	0	0	0	1	0	0	0	1	1	0	1	0	0	0	0	0	0	0	1	0	0	0
Ask_Ref_07	ASK_REF	ASK	REF	T	2	1	0	0	0	0	0	0	0	0	0	0	0	0	0	0	0	0	0	0	0	1	0	1	1	0	0	0	0	0	0	1	0	1	1	0	1	1	0	1	0	0	0	0	0
Ask_Ref_08	ASK_REF	ASK	REF	E	0	0	0	1	0	1	0	0	0	0	0	0	0	1	0	0	0	0	1	0	1	0	0	1	0	0	1	0	1	0	1	0	0	1	0	0	1	0	0	0	0	0	0	0	0
Ask_Ref_10	ASK_REF	ASK	REF	H	1	0	0	0	0	0	0	0	1	1	1	1	0	0	0	0	1	0	1	0	0	1	0	1	0	0	1	0	0	0	1	1	1	1	0	0	1	0	0	0	0	1	1	1	0
Ask_Ref_11	ASK_REF	ASK	REF	E	0	1	1	0	0	1	0	0	0	1	0	1	0	1	0	1	1	0	0	0	0	1	0	1	0	0	1	0	0	0	1	1	0	1	0	0	0	1	0	1	0	0	0	0	0
Ask_Ref_12	ASK_REF	ASK	REF	T	2	0	0	0	0	0	0	0	0	1	1	0	1	0	0	0	0	0	0	0	0	0	1	1	0	0	1	0	0	0	1	1	0	1	0	0	0	0	0	0	0	1	0	0	0
Ask_Ref_13	ASK_REF	ASK	REF	E	0	1	0	0	0	0	0	0	0	0	0	1	0	0	0	0	1	0	0	0	0	0	0	1	0	0	1	0	0	0	1	1	0	0	0	1	0	0	0	0	1	0	0	0	0
Ask_Ref_14	ASK_REF	ASK	REF	T	2	0	0	1	1	0	0	0	1	0	0	1	0	0	0	1	1	0	0	0	0	1	0	1	0	0	1	0	0	0	1	1	0	1	0	0	0	0	0	0	1	1	0	0	0
Ask_Ref_16	ASK_REF	ASK	REF	H	1	0	0	0	0	0	0	0	0	0	0	1	0	0	0	1	1	0	0	0	1	1	0	1	0	0	1	1	0	0	0	1	1	1	0	0	0	0	0	0	1	0	0	1	0
Ask_Ref_17	ASK_REF	ASK	REF	H	1	0	0	1	0	0	0	0	0	0	0	0	0	0	0	1	1	0	0	0	0	1	0	1	0	0	1	0	0	0	1	1	0	1	0	0	1	0	0	1	1	1	0	1	0
Ask_Ref_18	ASK_REF	ASK	REF	H	1	1	0	1	0	0	1	0	1	0	0	0	0	0	0	1	0	1	0	0	0	1	0	0	1	0	1	0	0	0	0	0	0	1	0	0	0	0	0	0	1	0	0	0	0
Ask_Ref_19	ASK_REF	ASK	REF	T	2	1	0	1	0	0	0	0	0	1	0	0	0	0	0	1	0	1	1	0	1	1	1	0	0	0	1	1	0	0	1	1	1	1	0	0	0	1	0	1	0	1	0	1	0
Ask_Ref_22	ASK_REF	ASK	REF	H	1	0	1	1	0	1	1	1	0	0	0	0	0	0	0	1	0	0	0	0	0	1	0	1	0	0	1	1	0	0	1	1	0	1	0	0	0	0	0	1	0	1	1	1	1
Ask_Ref_23	ASK_REF	ASK	REF	H	1	0	0	1	0	0	0	1	0	0	0	1	0	0	0	0	0	0	0	0	0	0	0	0	1	0	1	0	0	0	1	0	0	1	0	0	0	0	0	0	1	0	0	0	0
Ask_Ref_24	ASK_REF	ASK	REF	H	1	0	0	0	0	0	0	0	0	0	0	1	0	1	0	1	0	0	0	0	0	1	0	0	0	0	1	0	0	0	1	1	0	1	0	0	0	0	0	1	0	1	0	1	0
Ask_Ref_25	ASK_REF	ASK	REF	T	2	0	0	0	0	0	0	0	1	0	0	1	0	0	0	1	0	0	0	0	0	0	0	0	0	0	1	0	0	0	1	1	0	1	0	0	0	0	0	0	0	1	0	1	0
Ask_Ref_26	ASK_REF	ASK	REF	H	1	1	0	1	0	0	1	1	0	0	0	1	0	0	0	1	0	0	0	1	1	1	0	1	0	0	1	0	0	0	1	1	0	1	0	0	0	0	0	0	1	0	0	0	0
Ask_Ref_27	ASK_REF	ASK	REF	H	1	1	1	1	0	1	0	0	1	0	0	1	0	0	0	1	0	0	0	0	0	1	0	0	0	0	1	0	0	1	1	1	0	0	0	0	0	0	0	0	0	0	0	0	0
Ask_Ref_28	ASK_REF	ASK	REF	H	1	1	0	1	0	1	1	0	1	0	0	1	0	0	0	1	1	0	0	0	1	0	0	1	0	0	1	0	0	0	1	1	0	1	0	0	0	0	0	0	1	1	1	0	0
Ask_Ref_29	ASK_REF	ASK	REF	E	0	1	0	1	0	1	1	0	0	0	0	1	0	0	1	1	0	0	0	0	1	1	0	1	1	0	1	0	0	0	1	0	0	1	0	0	0	0	0	0	1	0	0	1	0
Ask_Ref_30	ASK_REF	ASK	REF	H	1	1	0	0	0	0	0	0	0	0	0	0	0	1	1	0	0	0	0	0	0	0	0	1	0	0	1	0	0	0	1	1	0	0	0	0	0	0	0	1	0	1	0	0	1
Ask_STP_01	ASK_STP	ASK	STP	H	1	1	1	1	0	0	1	1	0	1	0	1	0	0	1	0	0	1	0	0	0	1	0	0	1	1	1	0	0	1	1	1	0	1	0	0	0	1	1	1	0	1	0	1	1
Ask_STP_02	ASK_STP	ASK	STP	E	0	1	0	0	1	0	0	0	0	0	0	0	0	0	0	1	0	0	0	0	0	1	0	1	1	0	1	0	0	0	0	0	0	0	0	0	0	0	0	0	0	0	1	0	0
Ask_STP_03	ASK_STP	ASK	STP	E	0	0	0	0	0	1	0	1	0	0	0	0	0	1	0	1	0	0	0	0	0	1	0	1	0	0	1	0	0	0	1	0	0	1	1	0	0	0	0	0	0	1	0	1	0
Ask_STP_05	ASK_STP	ASK	STP	E	0	1	0	0	0	0	1	0	0	0	0	1	0	0	0	0	0	0	0	0	1	1	0	0	0	0	0	0	0	0	1	0	0	1	1	0	0	0	0	0	0	0	0	0	0
Ask_STP_06	ASK_STP	ASK	STP	T	2	1	0	0	1	1	0	0	0	1	1	1	0	1	0	1	1	1	0	0	1	0	0	1	1	0	1	0	0	0	1	0	1	1	0	0	1	0	0	1	0	0	0	0	1
Ask_STP_07	ASK_STP	ASK	STP	H	1	0	1	1	0	1	0	0	1	1	0	1	0	0	0	1	0	0	1	0	0	0	0	0	0	0	1	0	0	0	1	1	0	1	1	0	0	0	0	1	1	1	0	1	0
Ask_STP_09	ASK_STP	ASK	STP	T	2	1	0	1	0	0	0	0	0	0	0	1	0	0	0	1	0	0	0	0	0	0	0	1	0	0	1	0	0	0	1	0	0	1	0	0	0	1	0	1	0	0	1	1	0
Ask_STP_10	ASK_STP	ASK	STP	T	2	1	0	1	0	1	0	1	0	1	0	1	0	0	0	1	0	0	0	0	0	1	0	1	0	0	1	1	0	0	1	0	1	1	0	0	0	0	0	0	1	1	0	0	0
Ask_STP_11	ASK_STP	ASK	STP	E	0	1	0	1	0	1	0	0	1	0	1	1	0	0	0	0	1	0	1	0	0	1	1	1	1	1	1	1	0	1	1	1	0	1	0	1	0	0	0	0	0	1	0	1	0
Ask_STP_12	ASK_STP	ASK	STP	H	1	1	0	1	0	0	1	1	1	0	1	1	1	1	0	0	1	0	0	0	1	1	1	0	1	0	1	1	0	0	1	1	0	1	0	1	0	1	0	1	1	1	0	1	1
Ask_STP_13	ASK_STP	ASK	STP	E	0	0	1	1	0	1	0	0	0	0	1	1	0	1	0	1	0	0	1	0	1	1	0	1	0	0	1	0	0	1	1	1	1	0	0	0	1	0	0	0	1	1	0	0	0
Ask_STP_14	ASK_STP	ASK	STP	H	1	1	0	1	0	1	1	0	0	1	0	1	0	1	0	1	0	0	0	0	0	1	0	0	1	0	1	0	1	0	1	1	1	1	1	0	1	0	0	0	1	1	1	1	0
Ask_STP_15	ASK_STP	ASK	STP	H	1	1	0	1	0	0	0	0	0	0	0	1	0	0	0	0	0	0	0	0	0	1	1	0	0	0	1	0	0	0	1	0	0	1	0	0	1	0	1	0	1	1	0	0	0
Ask_STP_16	ASK_STP	ASK	STP	E	0	1	0	1	0	0	1	0	0	0	0	1	0	0	0	0	0	0	1	0	1	0	0	0	1	0	1	0	0	0	1	1	0	1	1	0	0	0	0	0	0	0	0	0	0
Ask_STP_17	ASK_STP	ASK	STP	E	0	0	0	0	0	0	0	0	0	0	1	1	0	0	0	1	0	0	0	0	0	0	0	1	0	0	1	0	1	0	1	1	0	1	0	0	0	0	0	1	0	1	0	1	0
Ask_STP_18	ASK_STP	ASK	STP	T	2	0	0	0	0	0	0	0	0	0	0	1	0	0	0	1	0	0	1	0	0	1	1	1	0	0	1	0	0	0	1	1	0	1	0	0	0	0	0	0	1	1	0	0	0
Ask_STP_19	ASK_STP	ASK	STP	T	2	1	1	1	0	1	0	0	1	0	0	1	0	0	0	1	0	0	0	0	1	1	0	1	0	0	1	0	0	0	1	1	0	1	0	0	0	0	0	0	1	1	0	0	1
Ask_STP_21	ASK_STP	ASK	STP	H	1	0	0	0	0	0	0	0	1	0	0	1	0	0	0	0	0	0	0	0	0	0	0	0	0	0	1	1	0	0	1	1	0	1	0	0	0	0	0	0	1	0	1	0	1
Ask_STP_23	ASK_STP	ASK	STP	NA	NA	1	1	1	0	1	0	0	0	0	1	1	0	0	0	1	0	0	0	0	0	1	1	1	1	0	1	0	0	0	0	0	1	1	0	0	0	0	0	1	0	1	1	1	0
Ask_STP_24	ASK_STP	ASK	STP	H	1	1	0	0	1	0	0	0	0	0	1	1	0	1	0	1	0	0	0	0	0	1	0	1	1	0	1	0	0	0	1	1	0	1	0	0	0	0	0	0	1	0	1	1	0
Ask_STP_25	ASK_STP	ASK	STP	T	2	1	0	1	0	1	1	0	1	1	0	1	0	1	0	1	0	0	1	0	0	1	0	1	1	0	1	0	1	0	1	1	1	1	0	0	0	1	0	0	1	1	0	0	0
Ask_STP_26	ASK_STP	ASK	STP	T	2	1	1	1	0	0	0	1	0	1	0	0	0	0	0	1	0	0	0	0	0	1	0	1	1	0	1	0	0	0	1	0	0	0	0	0	0	0	0	0	0	0	0	0	0
Ask_STP_27	ASK_STP	ASK	STP	T	2	0	1	0	0	0	1	1	1	0	0	1	1	0	0	0	0	1	1	0	1	1	1	0	1	1	1	0	0	0	1	0	1	1	0	0	1	0	0	0	0	1	0	1	1
Ask_STP_28	ASK_STP	ASK	STP	H	1	0	0	1	0	0	0	0	0	1	0	0	0	0	0	0	0	0	0	0	1	1	0	1	1	0	1	0	1	0	1	1	0	0	0	0	1	1	0	0	0	0	0	0	0
Ask_STP_30	ASK_STP	ASK	STP	T	2	0	0	1	0	1	0	0	0	0	0	0	0	0	0	1	0	0	0	0	0	0	0	0	0	0	1	0	0	0	1	1	0	1	0	0	0	0	0	1	0	0	0	0	1
TVA_Ref_01	TVA_REF	TVA	REF	T	2	0	0	1	1	0	0	0	0	1	0	1	0	0	0	1	1	0	0	0	0	1	0	0	1	0	1	0	0	0	1	1	0	1	0	0	0	1	0	0	1	1	0	0	0
TVA_Ref_02	TVA_REF	TVA	REF	E	0	0	1	1	0	0	0	0	0	0	0	1	0	0	0	1	0	0	0	0	0	1	0	1	0	0	1	0	0	0	1	0	0	0	0	0	0	0	0	1	0	0	0	1	0
TVA_Ref_03	TVA_REF	TVA	REF	E	0	0	0	1	0	0	0	0	1	1	0	1	0	0	0	0	1	0	1	0	0	0	0	0	0	0	1	0	0	0	1	0	0	1	0	0	1	0	0	0	1	0	0	0	0
TVA_Ref_04	TVA_REF	TVA	REF	H	1	0	0	0	0	0	0	0	1	0	0	0	0	0	0	1	1	0	0	0	0	1	0	1	0	0	1	0	0	0	1	1	0	0	0	0	1	0	0	0	0	0	0	0	0
TVA_Ref_05	TVA_REF	TVA	REF	E	0	0	0	1	0	1	0	1	0	1	0	1	0	0	0	1	0	0	0	0	0	0	0	0	1	0	1	0	0	0	1	1	0	1	0	0	0	0	0	0	1	0	0	0	0
TVA_Ref_06	TVA_REF	TVA	REF	H	1	0	0	1	0	0	1	1	0	0	0	0	0	0	0	0	0	0	0	0	0	0	0	1	0	0	1	0	1	0	1	0	0	1	0	0	0	0	0	0	0	0	0	1	0
TVA_Ref_07	TVA_REF	TVA	REF	T	2	0	0	0	0	1	1	0	0	0	1	1	0	0	0	1	0	1	0	0	0	0	0	1	0	0	1	0	0	0	1	1	0	1	0	0	1	0	0	0	0	0	1	0	0
TVA_Ref_08	TVA_REF	TVA	REF	E	0	1	0	1	0	1	0	0	0	0	0	1	0	0	0	0	0	0	0	1	0	0	0	1	0	0	1	1	0	0	1	1	0	0	0	0	0	0	0	0	0	0	0	1	0
TVA_Ref_09	TVA_REF	TVA	REF	NA	NA	1	1	1	0	0	0	0	0	1	0	0	0	0	0	1	0	0	0	0	0	0	0	1	0	0	1	0	0	0	1	0	0	1	0	0	0	0	0	0	0	0	0	0	0
TVA_Ref_10	TVA_REF	TVA	REF	H	1	0	0	0	0	0	1	0	0	0	0	0	0	0	0	1	0	0	0	0	0	1	0	1	0	0	1	1	0	0	1	1	0	1	0	0	0	0	0	0	1	1	0	0	0
TVA_Ref_11	TVA_REF	TVA	REF	E	0	0	1	0	0	0	0	0	1	0	0	1	0	0	0	0	0	0	1	0	0	1	0	1	0	0	1	0	0	0	1	1	0	1	0	0	0	0	0	0	0	1	0	0	0
TVA_Ref_12	TVA_REF	TVA	REF	H	1	0	0	0	0	1	0	1	0	0	0	1	0	0	0	1	0	0	0	0	0	1	0	0	1	0	1	0	1	0	0	1	0	1	1	0	1	1	0	0	0	0	0	0	0
TVA_Ref_13	TVA_REF	TVA	REF	E	0	1	0	1	0	1	0	1	1	0	0	1	1	1	0	1	0	0	0	1	0	1	0	0	1	1	1	0	0	0	1	1	0	1	0	0	0	0	0	0	1	1	0	1	0
TVA_Ref_14	TVA_REF	TVA	REF	H	1	1	1	1	0	0	1	0	0	0	0	1	0	1	0	0	1	1	0	0	0	1	0	0	1	0	1	1	0	0	1	1	0	1	0	0	1	1	0	1	1	1	0	1	0
TVA_Ref_15	TVA_REF	TVA	REF	H	1	1	0	0	0	0	0	0	0	0	0	0	1	0	1	1	1	0	0	0	0	0	0	1	0	0	1	0	1	0	1	0	1	1	0	0	1	0	1	0	0	1	0	0	0
TVA_Ref_16	TVA_REF	TVA	REF	E	0	1	0	1	0	0	0	0	1	1	0	1	0	0	0	0	0	0	0	0	0	1	0	1	0	0	1	1	0	0	1	1	0	1	0	0	0	0	0	1	0	1	1	0	0
TVA_Ref_17	TVA_REF	TVA	REF	T	2	1	0	1	0	1	0	0	0	0	1	0	0	0	0	1	0	0	0	1	0	1	0	1	1	0	1	0	0	0	1	1	0	0	0	0	0	0	0	0	1	1	0	0	0
TVA_Ref_18	TVA_REF	TVA	REF	H	1	1	1	1	0	0	0	1	1	1	0	0	0	0	0	1	0	0	0	0	0	0	1	1	0	0	1	0	1	0	1	1	0	0	0	0	0	0	0	0	1	1	0	1	1
TVA_Ref_20	TVA_REF	TVA	REF	H	1	0	0	1	1	1	0	0	0	0	0	0	0	1	0	1	0	0	0	0	1	1	0	0	0	0	1	0	0	0	0	1	0	0	0	0	0	0	0	0	0	0	0	0	0
TVA_Ref_21	TVA_REF	TVA	REF	T	2	0	0	0	0	1	0	1	0	0	0	1	0	0	0	1	1	0	1	0	0	1	0	1	0	0	1	0	0	0	1	1	0	1	0	0	1	1	0	1	0	0	1	1	0
TVA_Ref_22	TVA_REF	TVA	REF	H	1	1	0	1	0	0	0	0	0	0	0	0	0	0	0	0	0	0	0	0	0	0	0	0	0	0	1	0	0	0	1	1	0	0	0	0	0	0	0	0	1	1	0	0	1
TVA_Ref_23	TVA_REF	TVA	REF	T	2	0	1	1	0	0	1	0	0	0	0	1	0	1	0	1	1	0	0	0	0	1	1	1	0	0	1	0	0	0	1	1	0	1	0	0	0	0	0	0	1	1	0	1	0
TVA_Ref_24	TVA_REF	TVA	REF	T	2	0	0	0	0	0	0	0	1	0	0	1	0	0	1	1	0	0	0	0	0	0	0	1	0	0	1	1	0	0	1	1	0	1	0	0	0	0	0	0	0	1	1	0	0
TVA_Ref_25	TVA_REF	TVA	REF	H	1	0	0	1	0	0	0	0	1	0	0	1	0	0	0	1	1	0	0	0	0	0	1	1	0	0	1	0	0	1	1	1	0	1	0	0	0	0	0	1	1	0	1	0	0
TVA_Ref_26	TVA_REF	TVA	REF	H	1	0	0	1	0	0	0	0	0	0	0	1	0	0	0	1	1	0	0	1	1	1	0	1	0	0	1	0	0	0	1	1	0	1	1	0	1	1	0	1	1	1	0	0	0
TVA_Ref_29	TVA_REF	TVA	REF	H	1	1	0	0	0	0	0	0	0	1	1	1	0	0	0	0	0	0	0	0	0	1	0	0	0	0	1	1	0	0	1	1	1	1	0	0	1	1	0	1	1	0	1	0	0
TVA_Ref_30	TVA_REF	TVA	REF	E	0	0	0	0	0	0	0	0	0	0	0	1	1	0	0	1	0	0	0	0	0	1	0	0	1	0	1	0	1	0	1	1	0	1	0	0	0	1	0	0	0	1	0	0	1
TVA_STP_01	TVA_STP	TVA	STP	H	1	0	1	1	0	1	0	1	1	0	0	1	1	0	0	1	0	0	1	1	0	1	0	0	0	0	1	0	0	0	1	0	0	1	1	0	0	0	0	1	0	1	0	0	0
TVA_STP_02	TVA_STP	TVA	STP	H	1	1	0	0	0	1	1	1	0	0	0	1	0	0	0	0	0	0	0	1	0	1	0	1	1	0	1	0	0	0	0	1	0	0	1	0	0	0	0	0	0	0	0	1	0
TVA_STP_03	TVA_STP	TVA	STP	E	0	0	0	0	0	0	0	1	1	0	1	0	0	0	0	1	1	0	0	0	1	0	0	0	1	0	1	0	0	0	1	0	0	1	1	0	0	0	0	0	0	0	0	1	0
TVA_STP_04	TVA_STP	TVA	STP	T	2	0	0	0	0	1	0	0	0	0	0	1	0	0	1	1	0	0	0	0	0	0	0	1	0	0	1	0	0	0	1	0	1	1	0	0	0	1	0	1	0	0	0	0	1
TVA_STP_05	TVA_STP	TVA	STP	E	0	1	0	1	1	1	0	1	1	1	0	0	1	0	0	1	0	1	0	1	0	1	0	0	1	0	1	1	0	0	1	1	1	1	1	0	0	1	0	1	0	1	0	1	0
TVA_STP_06	TVA_STP	TVA	STP	H	1	0	0	0	0	0	0	0	1	0	0	0	0	0	0	0	1	0	0	0	1	1	0	1	1	1	1	1	1	0	0	0	0	0	0	0	1	1	0	0	1	1	0	0	0
TVA_STP_10	TVA_STP	TVA	STP	E	0	0	0	0	1	1	1	1	0	0	0	0	0	0	0	1	0	1	0	0	0	1	0	1	0	0	1	0	0	0	1	0	1	1	0	0	0	0	1	0	0	1	0	0	0
TVA_STP_12	TVA_STP	TVA	STP	H	1	0	0	1	0	1	0	0	0	0	0	1	0	0	0	0	0	0	0	0	1	0	0	1	0	0	1	0	0	0	1	1	1	1	0	0	0	1	0	0	0	1	0	1	0
TVA_STP_13	TVA_STP	TVA	STP	H	1	1	0	1	0	0	0	1	0	0	0	1	0	0	0	1	0	0	0	0	1	0	0	0	1	0	1	0	0	0	1	1	0	1	1	0	0	1	0	0	1	1	1	0	0
TVA_STP_14	TVA_STP	TVA	STP	H	1	0	0	1	0	0	0	0	0	1	0	1	0	0	0	1	0	0	0	0	1	1	0	1	0	0	1	0	0	0	1	1	0	1	0	0	1	0	0	0	1	1	0	1	0
TVA_STP_15	TVA_STP	TVA	STP	H	1	1	0	1	0	1	0	0	1	1	0	1	1	0	0	1	0	0	0	1	0	1	0	1	1	0	1	1	1	0	1	1	0	1	0	0	0	0	0	1	1	1	0	1	0
TVA_STP_16	TVA_STP	TVA	STP	H	1	0	0	0	0	1	0	0	1	0	0	1	0	0	1	1	0	0	0	0	0	1	0	1	0	0	1	0	0	0	1	1	0	1	0	0	0	0	0	1	1	1	0	0	0
TVA_STP_17	TVA_STP	TVA	STP	E	0	0	1	1	0	1	0	1	0	0	0	1	0	0	0	0	0	0	0	0	0	1	0	1	1	0	1	0	1	0	1	0	0	1	1	0	0	0	0	0	1	1	0	0	0
TVA_STP_19	TVA_STP	TVA	STP	E	0	0	1	1	0	0	0	0	1	0	0	1	1	0	0	0	0	1	1	0	1	0	0	1	0	0	1	1	0	0	1	1	0	1	0	0	1	0	0	1	1	1	0	0	0
TVA_STP_20	TVA_STP	TVA	STP	T	2	0	1	1	0	0	0	1	0	1	0	1	0	1	0	1	1	0	0	0	0	1	0	1	0	1	1	1	1	0	1	0	0	1	0	0	1	0	0	0	0	0	0	0	0
TVA_STP_21	TVA_STP	TVA	STP	H	1	1	0	1	0	0	1	0	1	1	0	1	0	0	0	1	1	0	0	0	1	1	1	0	1	0	1	0	0	0	1	1	0	1	1	0	1	0	0	0	0	1	0	1	1
TVA_STP_22	TVA_STP	TVA	STP	E	0	0	0	0	0	1	1	0	0	1	0	1	0	0	0	1	0	0	0	0	0	1	0	0	1	0	1	0	0	0	1	0	0	0	0	0	0	0	0	0	0	0	0	0	0
TVA_STP_23	TVA_STP	TVA	STP	H	1	1	1	1	0	1	0	1	1	1	0	1	0	0	0	1	0	0	0	1	0	1	0	0	1	0	1	1	0	1	1	1	0	1	0	0	0	0	0	1	1	1	0	0	0
TVA_STP_24	TVA_STP	TVA	STP	H	1	0	0	0	0	1	1	0	0	0	1	0	0	0	0	1	0	0	0	0	0	0	0	1	0	0	1	0	0	0	1	0	0	0	0	0	0	0	0	0	0	1	0	0	0
TVA_STP_25	TVA_STP	TVA	STP	E	0	1	0	0	0	0	0	0	0	0	0	0	0	0	0	0	0	0	0	0	0	0	0	0	0	0	1	0	0	0	0	0	0	0	0	0	0	0	0	0	0	1	0	0	1
TVA_STP_27	TVA_STP	TVA	STP	H	1	1	1	1	0	1	0	0	1	0	0	1	0	0	0	1	0	1	0	0	0	1	0	0	1	0	1	0	0	0	1	1	0	1	1	0	1	0	0	1	0	1	1	1	0
TVA_STP_28	TVA_STP	TVA	STP	H	1	1	0	0	0	1	0	0	1	0	0	1	0	0	0	0	1	0	0	0	0	0	0	1	1	0	1	0	0	0	1	1	0	1	1	0	1	0	0	0	1	1	1	1	0
TVA_STP_29	TVA_STP	TVA	STP	H	1	1	0	1	0	0	0	0	0	0	0	1	0	0	1	1	0	0	0	0	0	1	0	1	0	0	1	0	0	0	1	1	0	1	0	0	0	1	0	1	1	1	1	0	0
TVA_STP_30	TVA_STP	TVA	STP	E	0	0	0	0	0	0	0	0	0	0	0	0	0	0	0	1	0	0	0	0	0	0	0	1	0	0	1	0	0	0	1	1	1	1	0	1	0	1	1	0	1	1	0	1	0
Kar_Ref_04	KAR_REF	KAR	REF	T	2	0	0	1	0	0	0	1	1	1	0	0	0	0	0	1	0	0	0	0	0	0	0	1	0	0	1	0	0	0	1	1	0	1	0	0	0	1	0	0	1	1	0	1	1
Kar_Ref_05	KAR_REF	KAR	REF	NA	NA	1	0	1	1	0	1	0	1	1	1	1	0	0	0	1	1	0	1	0	0	1	0	1	1	0	1	0	0	0	1	1	0	1	0	0	1	1	0	0	0	0	0	0	0
Kar_Ref_06	KAR_REF	KAR	REF	NA	NA	0	1	1	0	0	1	0	1	1	0	1	0	1	1	0	1	0	1	0	1	1	0	1	1	1	1	1	0	0	1	1	0	1	0	0	1	1	0	0	1	1	0	1	0
Kar_Ref_07	KAR_REF	KAR	REF	E	0	0	0	1	0	1	0	0	0	0	0	1	0	0	0	1	0	0	1	0	1	0	0	1	0	0	1	0	0	0	1	1	0	1	0	0	0	0	0	0	1	0	1	0	0
Kar_Ref_08	KAR_REF	KAR	REF	E	0	0	0	0	0	0	0	0	0	0	0	1	0	0	0	1	0	0	0	0	0	0	0	0	0	0	1	0	0	0	1	0	1	1	0	0	0	0	0	0	1	0	0	1	0
Kar_Ref_09	KAR_REF	KAR	REF	NA	NA	1	0	1	0	0	1	0	0	1	0	0	1	0	0	1	1	0	0	0	0	1	0	0	1	0	1	0	0	0	1	0	0	1	0	0	0	1	0	0	0	1	0	0	0
Kar_Ref_10	KAR_REF	KAR	REF	E	0	0	0	0	0	0	0	0	0	0	0	1	0	0	0	1	0	0	0	0	1	0	0	0	0	1	1	0	0	0	0	0	0	1	0	0	0	0	0	1	0	0	0	0	0
Kar_Ref_11	KAR_REF	KAR	REF	H	1	1	0	1	0	0	1	1	1	1	0	1	0	0	0	1	0	0	1	0	0	1	1	0	1	0	1	0	0	0	1	0	1	1	0	0	0	0	0	0	0	1	0	1	0
Kar_Ref_12	KAR_REF	KAR	REF	H	1	0	1	1	1	1	0	0	1	0	1	1	0	0	0	1	1	1	1	0	1	1	0	0	1	0	1	0	0	0	0	1	1	1	1	0	1	1	0	0	1	0	0	1	0
Kar_Ref_13	KAR_REF	KAR	REF	H	1	0	0	1	0	0	0	1	0	0	0	1	0	0	0	0	1	0	0	0	0	0	0	1	0	0	1	0	0	0	1	0	0	1	0	0	0	0	0	0	0	1	0	1	0
Kar_Ref_14	KAR_REF	KAR	REF	NA	NA	1	0	0	0	1	0	0	1	1	0	1	0	0	0	0	0	1	0	1	1	1	0	1	1	0	1	0	0	0	1	1	0	1	1	0	0	0	0	1	1	1	0	1	0
Kar_Ref_15	KAR_REF	KAR	REF	NA	NA	0	1	1	0	0	0	1	0	1	0	1	0	0	0	1	0	0	0	0	0	1	0	1	1	1	1	0	0	0	1	0	0	1	0	0	0	1	0	0	0	0	0	1	0
Kar_Ref_16	KAR_REF	KAR	REF	T	2	0	0	1	0	0	1	1	1	1	0	1	0	0	0	1	1	0	0	0	0	1	0	0	1	0	1	0	0	0	0	0	0	1	0	0	1	1	0	0	0	0	1	0	0
Kar_Ref_17	KAR_REF	KAR	REF	E	0	1	1	1	0	1	0	1	1	0	1	1	0	0	0	1	0	0	0	1	0	1	1	1	0	0	1	0	0	0	1	1	0	1	0	0	1	0	0	0	1	0	0	1	0
Kar_Ref_18	KAR_REF	KAR	REF	E	0	1	1	1	0	1	1	0	0	0	0	1	0	1	0	1	0	0	0	0	0	0	1	1	0	0	1	1	0	0	0	1	1	1	0	0	0	1	1	0	0	1	0	0	0
Kar_Ref_19	KAR_REF	KAR	REF	H	1	0	0	0	0	1	0	0	1	0	0	1	0	0	0	1	0	0	0	0	0	0	0	0	0	0	1	0	0	0	1	0	0	0	0	0	0	0	0	1	0	0	1	0	0
Kar_Ref_20	KAR_REF	KAR	REF	H	1	1	0	1	0	1	1	1	1	0	1	1	0	0	0	1	1	1	0	0	0	0	0	1	1	0	0	0	0	0	1	0	0	1	0	0	0	0	0	0	0	0	0	0	0
Kar_Ref_21	KAR_REF	KAR	REF	NA	NA	1	1	1	0	0	1	1	1	1	0	1	0	1	0	1	1	0	0	1	1	1	0	0	1	1	1	0	0	0	1	0	1	1	1	0	1	1	0	0	0	1	0	1	1
Kar_Ref_22	KAR_REF	KAR	REF	H	1	0	0	0	0	0	0	1	0	1	0	0	0	0	1	1	0	0	0	0	0	0	0	0	0	0	1	0	0	0	0	1	0	0	0	0	0	0	0	0	1	1	0	0	1
Kar_Ref_23	KAR_REF	KAR	REF	E	0	0	0	0	0	0	0	0	0	0	0	0	0	1	1	1	0	0	0	0	0	0	0	1	0	0	1	0	0	0	0	1	0	0	0	0	0	0	0	0	1	1	1	0	1
Kar_Ref_24	KAR_REF	KAR	REF	NA	NA	0	0	1	0	0	0	0	0	1	0	1	0	0	0	1	0	0	0	0	0	1	0	1	0	0	1	0	0	1	1	1	0	1	0	1	0	0	0	0	0	1	1	0	0
Kar_Ref_25	KAR_REF	KAR	REF	E	0	1	0	1	0	0	0	0	1	0	0	0	0	0	0	1	0	0	0	0	0	0	0	0	0	0	1	0	0	0	0	1	0	1	0	0	0	0	0	0	0	1	0	0	1
Kar_Ref_26	KAR_REF	KAR	REF	H	1	0	0	0	0	0	0	0	0	0	0	0	0	0	0	1	0	0	0	0	0	0	0	0	0	0	1	0	0	0	0	0	0	1	0	0	0	0	0	0	0	0	0	1	0
Kar_Ref_27	KAR_REF	KAR	REF	E	0	0	1	0	0	0	1	0	1	0	0	1	0	0	0	1	1	0	1	0	0	1	1	1	0	0	1	0	0	0	1	1	1	1	0	0	0	1	0	1	0	1	0	1	0
Kar_Ref_28	KAR_REF	KAR	REF	E	0	0	0	0	0	0	0	1	0	1	0	1	0	0	0	0	0	0	0	0	0	1	0	1	0	0	1	0	0	0	1	1	1	1	1	0	0	0	0	0	1	1	0	1	0
Kar_Ref_29	KAR_REF	KAR	REF	E	0	0	0	0	0	0	0	0	0	0	1	1	0	0	0	1	1	0	0	0	0	1	0	0	0	0	1	0	0	0	1	1	1	0	0	1	0	0	0	0	0	0	0	0	0
Kar_Ref_30	KAR_REF	KAR	REF	E	0	1	0	1	0	0	0	0	1	1	0	1	0	0	1	0	0	1	1	0	0	1	0	1	0	0	1	0	0	0	1	1	0	1	0	0	0	1	0	0	0	0	0	1	0
Kar_STP_01	KAR_STP	KAR	STP	E	0	1	1	0	0	0	0	0	0	0	0	1	0	0	0	1	0	1	1	0	0	0	0	1	0	0	1	0	0	0	0	0	0	1	0	0	0	0	0	0	0	1	1	0	0
Kar_STP_03	KAR_STP	KAR	STP	H	1	0	1	1	0	0	0	0	0	0	1	1	0	0	0	1	0	0	0	0	0	0	0	0	0	0	1	0	0	0	1	1	0	0	0	0	0	0	0	0	0	0	1	0	0
Kar_STP_04	KAR_STP	KAR	STP	NA	NA	0	0	1	0	1	0	0	1	0	0	0	0	0	0	1	0	0	0	0	0	0	0	0	1	1	1	0	1	0	1	1	0	1	0	0	1	0	0	0	0	0	0	1	0
Kar_STP_08	KAR_STP	KAR	STP	NA	NA	0	0	1	0	1	0	1	0	0	0	0	0	0	0	1	0	1	0	0	1	1	1	0	1	0	1	0	0	0	1	0	0	1	0	0	0	0	0	0	0	0	0	0	0
Kar_STP_09	KAR_STP	KAR	STP	NA	NA	0	1	1	0	0	1	0	0	0	0	0	0	0	0	1	0	0	0	0	0	1	0	0	1	0	1	0	0	0	0	0	0	1	0	0	0	1	0	0	0	0	0	0	0
Kar_STP_10	KAR_STP	KAR	STP	H	1	1	0	0	0	0	0	0	0	0	0	0	0	0	0	1	0	0	0	0	0	0	0	0	0	0	1	0	0	0	0	1	0	1	0	0	0	0	0	0	0	1	0	0	0
Kar_STP_12	KAR_STP	KAR	STP	H	1	1	0	1	0	0	1	1	0	0	0	0	1	0	0	1	0	1	0	0	0	1	0	0	1	1	1	0	0	0	1	1	0	1	0	0	0	0	0	0	0	0	0	0	0
Kar_STP_13	KAR_STP	KAR	STP	H	1	0	1	0	0	0	1	0	1	0	0	1	0	0	0	0	1	0	0	0	0	0	0	0	1	0	1	0	0	0	1	1	0	1	0	0	0	0	0	0	1	0	1	0	0
Kar_STP_14	KAR_STP	KAR	STP	E	0	0	0	0	0	0	1	0	1	0	1	1	0	0	0	1	0	0	0	0	0	0	0	1	0	0	1	0	0	0	1	1	0	1	0	0	0	0	0	0	0	1	0	0	0
Kar_STP_15	KAR_STP	KAR	STP	H	1	1	1	1	0	1	0	0	1	0	0	1	0	0	0	1	0	0	1	0	0	1	0	1	0	0	1	1	0	0	1	1	0	1	1	0	0	0	0	0	0	1	1	0	0
Kar_STP_16	KAR_STP	KAR	STP	NA	NA	1	0	0	0	1	0	1	0	1	0	1	0	0	0	0	0	0	0	0	0	1	0	1	1	1	1	0	0	0	0	0	0	1	0	0	0	0	0	0	1	0	0	1	0
Kar_STP_17	KAR_STP	KAR	STP	H	1	0	0	1	0	0	1	0	0	0	0	1	0	0	1	1	1	0	0	0	0	0	0	0	0	0	1	1	0	0	1	0	0	1	0	0	0	0	0	1	0	0	0	0	0
Kar_STP_18	KAR_STP	KAR	STP	T	2	0	1	1	1	0	1	0	1	1	0	0	0	0	0	1	0	0	0	0	0	1	0	0	1	0	1	1	0	0	0	0	1	1	0	0	0	0	0	0	0	1	0	0	0
Kar_STP_19	KAR_STP	KAR	STP	H	1	0	0	1	0	0	1	0	0	0	0	1	0	1	0	1	0	0	0	0	1	1	0	0	1	0	1	0	0	1	1	1	0	1	0	0	0	1	0	0	1	1	0	1	0
Kar_STP_20	KAR_STP	KAR	STP	T	2	1	0	1	0	0	0	0	0	0	0	1	0	0	1	1	0	0	0	0	0	0	0	1	0	0	1	0	0	0	1	1	1	1	1	0	1	1	0	0	1	0	1	0	0
Kar_STP_21	KAR_STP	KAR	STP	NA	NA	1	0	1	0	0	1	1	1	0	1	0	1	1	0	1	0	1	1	0	1	1	0	1	1	0	1	1	1	0	1	1	1	1	1	0	1	0	0	1	0	1	1	1	1
Kar_STP_22	KAR_STP	KAR	STP	NA	NA	1	0	1	0	0	1	1	0	1	0	1	0	1	0	1	0	1	0	1	1	1	1	0	1	1	1	0	0	0	1	1	0	1	1	0	1	0	0	0	1	1	0	1	0
Kar_STP_23	KAR_STP	KAR	STP	E	0	1	0	0	0	0	1	0	1	1	0	1	0	0	0	1	0	0	1	0	0	0	0	1	0	0	1	1	0	0	1	1	0	1	0	1	0	0	0	1	0	1	1	0	0
Kar_STP_24	KAR_STP	KAR	STP	E	0	1	0	1	0	0	0	0	0	1	1	0	0	0	0	1	0	0	0	0	1	1	0	0	1	0	1	0	0	0	1	0	0	0	0	0	0	0	0	0	0	1	0	0	0
Kar_STP_25	KAR_STP	KAR	STP	NA	NA	0	0	1	0	1	0	0	0	1	0	0	0	0	0	0	0	0	0	0	1	1	0	0	0	0	1	0	0	0	1	1	0	0	0	0	0	0	0	0	0	0	0	0	0
Kar_STP_26	KAR_STP	KAR	STP	T	2	0	0	1	0	0	0	0	1	0	0	1	0	0	0	0	1	0	0	0	0	1	0	0	0	0	1	0	0	0	1	1	0	1	0	1	0	0	0	0	1	0	0	1	0
Kar_STP_27	KAR_STP	KAR	STP	H	1	0	1	1	0	1	1	0	1	0	0	1	1	0	0	1	1	1	0	0	0	1	0	1	1	0	1	0	0	0	1	1	0	1	0	0	0	0	0	0	0	1	0	0	0
Kar_STP_28	KAR_STP	KAR	STP	E	0	0	0	1	0	0	0	0	0	0	0	0	0	0	0	1	1	0	0	0	0	0	0	0	0	0	1	0	0	0	1	1	0	0	0	0	0	0	0	0	0	1	0	1	0
Kar_STP_29	KAR_STP	KAR	STP	NA	NA	0	1	1	0	0	1	1	0	1	0	0	1	0	0	1	0	0	0	0	0	1	0	0	1	1	1	0	0	0	1	0	0	1	0	0	0	1	0	1	0	1	0	1	0
Kar_STP_30	KAR_STP	KAR	STP	NA	NA	1	0	1	0	0	0	0	0	1	0	0	0	0	0	0	0	0	0	0	0	0	0	1	0	0	1	0	0	0	0	0	0	0	0	0	0	0	0	0	0	1	0	0	1
GDA_Ref_01	GDA_REF	GDA	REF	E	0	0	1	1	0	0	1	0	0	1	0	1	0	0	0	1	0	0	0	0	0	0	0	0	1	0	1	0	0	0	1	0	1	1	0	1	0	0	0	0	0	1	0	0	0
GDA_Ref_02	GDA_REF	GDA	REF	H	1	1	1	1	0	1	0	1	1	0	0	1	0	0	0	1	1	0	0	0	1	1	0	0	1	1	1	1	0	0	0	1	0	1	0	0	0	0	0	0	0	0	0	1	0
GDA_Ref_03	GDA_REF	GDA	REF	E	0	1	0	1	0	1	1	0	0	0	0	1	0	1	0	1	0	0	0	0	1	1	0	0	1	0	1	0	0	0	1	0	0	1	0	0	0	0	0	0	0	1	0	0	0
GDA_Ref_04	GDA_REF	GDA	REF	E	0	1	1	1	0	1	0	1	0	0	1	1	0	0	0	1	0	0	0	0	0	1	1	1	0	0	1	1	0	0	1	1	0	1	0	0	0	0	0	0	1	1	0	0	0
GDA_Ref_05	GDA_REF	GDA	REF	T	2	0	0	1	0	0	0	0	1	0	0	1	0	0	0	0	0	0	0	0	0	0	0	1	0	0	1	0	0	0	1	1	0	1	0	0	0	0	0	0	0	1	0	1	0
GDA_Ref_06	GDA_REF	GDA	REF	H	1	0	1	1	0	1	1	0	1	0	0	0	0	0	0	0	0	0	1	0	0	0	0	1	0	0	1	0	0	0	1	1	0	1	0	0	1	0	0	0	1	1	0	0	0
GDA_Ref_07	GDA_REF	GDA	REF	E	0	0	0	1	0	0	0	0	1	0	0	1	0	0	0	1	0	0	0	0	0	1	0	0	0	0	1	0	1	0	1	1	0	0	1	0	1	0	0	0	0	1	1	0	0
GDA_Ref_08	GDA_REF	GDA	REF	H	1	1	0	1	0	0	0	0	0	0	0	1	0	0	0	1	0	0	1	0	0	0	0	0	0	0	1	1	0	0	1	1	0	1	0	0	0	0	0	1	0	1	0	0	0
GDA_Ref_09	GDA_REF	GDA	REF	H	1	0	1	1	0	0	1	0	1	1	1	1	0	0	0	1	0	1	1	0	0	1	0	0	1	0	1	0	0	0	1	0	1	1	0	0	1	1	0	0	0	1	0	0	0
GDA_Ref_10	GDA_REF	GDA	REF	H	1	1	0	1	1	0	0	0	1	1	0	0	0	0	0	0	0	1	0	0	0	1	0	0	1	0	1	0	0	1	1	1	0	0	0	0	0	0	0	0	1	1	0	0	0
GDA_Ref_11	GDA_REF	GDA	REF	E	0	0	1	1	0	1	0	0	0	1	1	0	0	0	0	1	1	0	0	0	0	0	0	0	1	1	1	0	1	0	0	0	0	1	1	0	0	1	0	0	0	1	0	1	0
GDA_Ref_12	GDA_REF	GDA	REF	H	1	0	0	0	0	0	0	0	0	0	0	1	0	0	1	1	1	0	0	0	0	0	0	1	0	0	1	0	0	1	1	0	1	1	1	0	0	0	0	0	0	1	0	0	0
GDA_Ref_13	GDA_REF	GDA	REF	E	0	0	1	1	0	1	0	0	0	0	1	1	0	0	0	1	0	1	0	0	0	0	0	1	0	0	1	0	0	1	1	0	0	1	0	0	0	0	0	0	1	1	1	0	0
GDA_Ref_14	GDA_REF	GDA	REF	H	1	0	0	1	0	1	0	1	1	0	0	1	0	0	0	1	1	0	0	0	0	1	0	1	0	0	1	1	1	0	1	1	1	1	0	0	0	0	0	0	0	1	1	0	0
GDA_Ref_15	GDA_REF	GDA	REF	T	2	0	1	0	0	0	0	0	1	0	0	0	0	0	0	0	0	0	0	0	1	1	0	1	0	0	1	0	0	0	1	1	0	1	0	0	1	0	1	0	1	0	0	0	0
GDA_Ref_16	GDA_REF	GDA	REF	E	0	0	0	1	0	0	1	0	1	0	0	0	0	0	0	1	0	0	1	0	1	1	0	1	0	0	1	0	0	0	1	1	1	1	1	1	0	0	0	1	1	1	0	0	0
GDA_Ref_17	GDA_REF	GDA	REF	H	1	0	1	0	0	0	0	1	1	0	0	0	0	0	1	1	0	0	1	0	0	0	0	0	1	0	1	1	0	0	1	1	1	1	1	0	0	1	0	0	0	0	1	0	0
GDA_Ref_18	GDA_REF	GDA	REF	H	1	1	0	0	0	0	0	0	0	0	0	1	0	0	0	1	0	0	0	0	0	0	0	0	0	0	1	0	0	0	1	1	0	0	0	0	0	0	0	0	1	1	0	0	0
GDA_Ref_19	GDA_REF	GDA	REF	E	0	0	1	1	0	0	1	0	0	0	1	0	0	0	0	1	0	0	0	0	1	1	0	0	1	1	1	0	0	0	1	1	0	0	0	0	0	0	0	0	0	1	0	0	0
GDA_Ref_20	GDA_REF	GDA	REF	T	2	0	0	1	0	1	0	0	0	1	0	1	0	1	0	1	0	0	0	0	1	1	1	1	0	0	0	0	0	0	1	1	0	1	0	0	0	0	0	0	0	1	1	0	0
GDA_Ref_21	GDA_REF	GDA	REF	H	1	0	1	1	0	1	0	1	1	1	0	0	1	0	0	1	1	0	0	0	0	1	1	1	1	1	1	0	0	0	1	1	0	1	0	0	0	0	0	0	0	0	1	1	0
GDA_Ref_22	GDA_REF	GDA	REF	E	0	0	1	1	0	0	1	1	0	1	0	1	0	0	1	0	0	0	0	0	0	0	0	0	0	0	1	0	0	0	1	1	1	1	0	0	0	0	0	0	1	1	0	0	0
GDA_Ref_23	GDA_REF	GDA	REF	E	0	0	0	1	0	1	0	1	0	0	0	1	0	0	0	0	0	0	0	0	0	0	0	1	1	0	1	0	1	0	1	1	1	0	0	0	1	0	0	0	0	1	0	1	0
GDA_Ref_24	GDA_REF	GDA	REF	E	0	1	1	0	0	0	0	1	1	0	1	0	1	1	0	1	0	1	0	1	0	0	0	0	1	0	1	0	0	0	1	0	0	1	0	0	1	0	0	0	1	0	0	0	0
GDA_Ref_25	GDA_REF	GDA	REF	E	0	0	0	0	0	0	0	0	0	0	0	0	0	0	0	0	1	0	0	0	0	0	0	0	1	0	1	0	0	0	1	1	0	1	1	0	1	0	0	1	0	1	1	0	0
GDA_Ref_26	GDA_REF	GDA	REF	E	0	1	0	1	0	0	0	0	1	0	1	0	0	0	0	0	0	0	1	0	0	0	1	1	0	0	1	1	0	0	1	0	1	1	0	1	0	1	0	0	1	1	1	0	0
GDA_Ref_27	GDA_REF	GDA	REF	H	1	0	0	0	0	0	1	0	1	0	0	1	0	0	0	1	1	0	0	0	0	0	0	0	0	0	1	1	0	0	1	0	1	1	0	0	1	1	0	0	0	0	1	0	0
GDA_Ref_28	GDA_REF	GDA	REF	H	1	0	0	0	0	0	0	0	0	0	0	0	0	0	0	1	0	0	0	0	0	0	0	0	0	0	1	0	0	0	0	1	0	1	0	0	0	0	0	0	0	1	0	0	0
GDA_Ref_29	GDA_REF	GDA	REF	E	0	0	0	1	0	0	0	0	0	0	0	1	0	0	0	1	0	0	1	0	0	1	0	1	0	0	1	1	0	0	1	1	0	1	0	0	1	0	0	0	0	1	0	0	0
GDA_Ref_30	GDA_REF	GDA	REF	H	1	0	0	0	0	1	0	0	0	0	0	0	0	0	0	1	1	0	0	0	0	0	0	0	0	0	1	0	0	0	0	1	0	1	0	0	0	0	0	0	1	1	0	0	0
GDA_STP_01	GDA_STP	GDA	STP	NA	NA	1	1	1	0	1	1	0	0	0	0	0	0	0	0	1	0	1	0	0	0	0	0	1	1	0	1	0	0	0	1	0	1	1	0	0	0	0	0	0	0	0	0	0	0
GDA_STP_02	GDA_STP	GDA	STP	T	2	0	1	1	0	0	1	1	0	1	0	0	0	0	0	1	0	0	0	0	1	1	0	0	1	0	1	1	0	0	1	1	0	1	0	0	0	0	0	0	1	1	0	1	0
GDA_STP_03	GDA_STP	GDA	STP	H	1	0	0	1	0	0	0	1	1	0	0	1	0	0	0	0	1	0	0	0	1	0	0	1	1	0	1	0	0	0	1	1	0	1	1	0	0	0	0	0	0	1	0	0	0
GDA_STP_04	GDA_STP	GDA	STP	E	0	0	0	1	0	0	0	0	0	0	0	1	0	0	0	1	1	0	0	0	0	0	0	0	0	0	1	0	0	0	1	0	0	1	0	0	1	0	0	0	0	0	0	0	0
GDA_STP_05	GDA_STP	GDA	STP	H	1	0	0	1	0	0	0	1	1	0	0	1	0	0	0	1	0	0	0	0	0	0	0	1	0	0	1	0	0	0	1	1	0	0	0	0	0	0	0	0	1	1	0	1	0
GDA_STP_06	GDA_STP	GDA	STP	H	1	0	1	1	0	0	1	1	1	0	1	1	1	0	0	1	0	0	1	1	0	1	0	1	1	1	1	0	0	1	1	0	0	1	1	0	0	1	0	0	1	1	0	1	0
GDA_STP_07	GDA_STP	GDA	STP	E	0	0	1	1	0	1	0	0	0	0	0	1	0	0	0	1	0	0	0	0	0	0	0	0	0	0	1	1	0	0	1	1	0	1	0	0	0	0	0	0	1	1	1	1	0
GDA_STP_08	GDA_STP	GDA	STP	E	0	0	0	1	0	0	0	0	1	1	0	1	0	0	0	0	0	0	0	1	1	1	0	1	0	0	1	1	0	0	1	1	0	1	0	0	1	0	0	0	1	0	0	0	0
GDA_STP_09	GDA_STP	GDA	STP	E	0	1	0	0	1	0	1	0	1	1	0	1	0	0	0	1	0	1	1	0	1	1	0	1	1	0	1	0	0	0	1	1	0	1	0	0	0	0	0	0	0	0	1	0	0
GDA_STP_10	GDA_STP	GDA	STP	H	1	1	0	0	0	0	0	0	1	1	0	0	0	0	0	1	0	1	0	0	0	1	0	0	0	0	1	0	0	0	1	0	0	1	0	0	0	1	0	0	0	0	0	0	0
GDA_STP_11	GDA_STP	GDA	STP	E	0	0	0	1	0	1	0	1	1	0	0	1	0	0	0	0	0	0	1	0	0	1	0	1	0	0	1	0	0	0	1	1	0	1	0	0	0	0	0	1	0	1	0	0	0
GDA_STP_12	GDA_STP	GDA	STP	T	2	0	0	1	0	0	0	0	0	0	0	0	0	0	0	1	0	0	0	0	0	0	0	0	0	0	1	0	1	0	1	1	0	0	0	0	0	0	0	0	1	1	0	0	0
GDA_STP_13	GDA_STP	GDA	STP	T	2	1	0	0	0	0	0	0	0	0	0	1	0	0	0	1	0	0	1	0	0	0	0	1	0	1	1	0	0	0	1	1	0	1	0	0	0	0	0	0	0	0	1	1	0
GDA_STP_14	GDA_STP	GDA	STP	E	0	0	0	1	0	0	0	0	1	0	0	1	0	1	0	1	1	0	1	0	0	1	0	1	0	0	1	0	0	0	1	1	0	1	0	0	0	1	1	0	0	1	0	0	0
GDA_STP_15	GDA_STP	GDA	STP	T	2	0	0	0	0	0	0	0	0	0	1	1	0	0	0	0	1	0	1	1	0	0	0	1	0	0	1	0	0	0	1	0	1	1	0	0	1	0	0	1	0	0	0	0	0
GDA_STP_16	GDA_STP	GDA	STP	T	2	0	0	1	0	0	0	0	0	1	0	0	0	0	0	0	0	0	0	0	0	0	0	0	1	0	0	0	0	0	1	0	1	1	0	0	0	1	0	1	1	0	0	0	0
GDA_STP_17	GDA_STP	GDA	STP	T	2	1	1	1	0	1	1	1	1	1	0	1	0	0	0	1	1	0	1	0	0	1	0	0	1	0	1	0	1	0	1	1	0	1	1	0	1	0	0	0	1	1	0	1	1
GDA_STP_18	GDA_STP	GDA	STP	E	0	1	1	0	0	0	1	1	1	1	0	1	0	0	0	1	0	0	0	1	0	1	0	0	1	0	1	0	1	0	1	1	0	1	1	0	0	0	0	0	0	1	0	0	0
GDA_STP_19	GDA_STP	GDA	STP	H	1	0	0	1	0	1	0	0	1	0	0	0	0	0	0	1	1	0	0	0	0	1	1	1	0	0	1	0	0	0	1	1	1	1	0	1	0	0	0	1	0	1	1	1	0
GDA_STP_21	GDA_STP	GDA	STP	E	0	1	1	1	0	1	1	0	1	1	0	1	0	0	0	1	1	0	1	1	1	1	0	0	1	1	1	0	0	0	1	1	0	1	1	0	0	0	0	0	0	1	0	1	0
GDA_STP_22	GDA_STP	GDA	STP	H	1	0	1	1	0	0	1	0	0	1	0	1	0	0	0	1	0	0	1	1	1	1	0	1	1	0	1	1	0	0	1	1	0	1	0	0	1	0	0	0	0	1	0	0	0
GDA_STP_23	GDA_STP	GDA	STP	T	2	0	1	0	0	1	1	0	0	0	0	0	0	0	0	1	0	0	0	0	0	1	0	0	1	0	1	0	0	0	1	0	0	0	0	0	0	0	0	0	0	0	0	0	0
GDA_STP_24	GDA_STP	GDA	STP	E	0	0	1	0	0	1	1	0	0	0	0	0	0	0	0	1	0	0	0	0	0	1	0	0	1	0	1	0	0	0	1	0	0	0	0	0	0	0	0	0	0	0	0	0	0
GDA_STP_25	GDA_STP	GDA	STP	T	2	0	0	1	0	1	0	0	0	0	0	1	0	0	0	1	0	0	0	0	0	0	0	0	1	0	1	0	0	0	1	0	0	1	0	0	0	0	0	0	0	0	0	0	0
GDA_STP_26	GDA_STP	GDA	STP	E	0	1	0	1	0	1	0	0	1	0	0	0	0	0	0	1	0	1	0	0	0	0	0	1	1	0	1	0	0	0	1	0	0	0	0	0	0	0	0	0	1	1	0	0	0
GDA_STP_27	GDA_STP	GDA	STP	H	1	1	1	1	1	0	0	0	0	0	1	0	0	0	0	1	0	0	0	0	0	0	0	0	1	0	1	1	0	0	1	1	0	0	0	0	1	1	0	0	0	1	0	0	0
GDA_STP_28	GDA_STP	GDA	STP	H	1	0	0	0	0	0	0	1	0	0	0	0	0	0	0	0	0	0	1	0	1	1	0	1	0	0	1	0	0	0	1	1	0	1	0	1	0	1	0	0	1	1	0	0	0
GDA_STP_29	GDA_STP	GDA	STP	E	0	1	1	0	0	1	0	0	0	0	0	1	0	0	0	0	0	1	0	0	0	1	0	0	0	0	1	0	0	0	0	0	0	1	0	1	0	0	0	0	0	1	0	0	0
GDA_STP_30	GDA_STP	GDA	STP	H	1	0	0	1	1	1	0	0	0	1	0	1	0	0	0	1	0	0	0	0	0	0	0	0	0	0	1	0	0	0	0	0	0	1	0	0	0	0	0	0	0	1	0	0	1
[truncated: 310 more columns]

## Sheet: HAR_REF_ALL
SAMPLE	SITE	LOCATION	POLLUTION_TYPE	SPECIES	TROSSULUS	PrimH_1	PrimH_2	PrimH_3	PrimH_4	PrimH_5	PrimH_6	PrimH_7	PrimH_8	PrimH_9	PrimH_10	PrimH_13	PrimH_14	PrimH_18	PrimH_19	PrimH_21	PrimH_22	PrimH_23	PrimH_24	PrimH_25	PrimH_26	PrimH_27	PrimH_28	PrimH_29	PrimH_30	PrimH_31	PrimH_33	PrimH_35	PrimH_37	PrimH_38	PrimH_39	PrimH_40	PrimH_41	PrimH_42	PrimH_43	PrimH_44	PrimH_45	PrimH_46	PrimH_48	PrimH_49	PrimH_50	PrimH_51	PrimH_52	PrimH_54	PrimH_55
Ask_Har_01	ASK_HAR	ASK	HAR	H	1	0	0	0	0	0	0	0	0	0	0	0	1	0	0	1	0	0	1	0	1	0	0	1	0	0	1	0	0	0	1	0	0	1	1	0	0	0	1	0	1	1	0	1	0
Ask_Har_02	ASK_HAR	ASK	HAR	H	1	0	1	0	0	1	1	0	0	0	0	1	0	0	0	1	0	0	1	0	0	0	0	1	0	0	1	0	0	0	1	1	0	1	0	0	0	0	0	0	0	1	1	0	0
Ask_Har_03	ASK_HAR	ASK	HAR	E	0	0	0	0	0	0	0	0	0	1	0	1	0	0	0	0	0	0	0	0	0	1	0	0	1	0	1	0	0	0	1	1	0	1	0	0	0	0	0	0	1	1	0	0	0
Ask_Har_04	ASK_HAR	ASK	HAR	E	0	0	0	0	0	1	0	0	1	1	0	1	0	0	0	0	0	0	1	0	0	0	0	0	1	0	1	0	0	0	1	1	0	1	0	0	0	0	0	0	0	0	1	0	0
Ask_Har_05	ASK_HAR	ASK	HAR	E	0	0	0	1	0	1	0	0	1	0	0	1	0	0	0	1	0	0	1	0	0	1	0	1	0	0	1	0	0	0	1	1	0	1	0	0	0	0	0	0	1	1	0	1	0
Ask_Har_06	ASK_HAR	ASK	HAR	E	0	1	0	1	0	0	1	0	0	0	0	1	1	0	0	1	0	0	0	0	0	1	0	0	0	0	1	0	1	0	1	0	0	1	0	0	0	0	0	0	0	0	1	0	0
Ask_Har_07	ASK_HAR	ASK	HAR	H	1	0	0	0	0	0	0	0	0	0	0	1	0	0	0	0	0	0	0	0	0	1	0	1	0	0	1	1	0	1	1	1	0	1	0	0	1	0	0	1	0	0	0	1	1
Ask_Har_08	ASK_HAR	ASK	HAR	E	0	1	0	1	0	0	0	0	0	0	0	1	1	0	0	0	0	0	0	0	0	0	0	1	1	0	1	0	0	1	1	0	0	1	0	1	0	0	0	0	1	0	1	1	0
Ask_Har_09	ASK_HAR	ASK	HAR	E	0	0	0	0	0	1	1	0	0	0	0	0	0	0	0	1	0	0	1	0	0	0	0	1	0	0	0	0	0	1	0	0	0	0	0	0	0	1	0	0	0	0	0	0	0
Ask_Har_10	ASK_HAR	ASK	HAR	E	0	1	0	0	0	0	0	0	0	0	0	0	0	0	0	0	0	0	0	0	0	0	0	0	0	0	0	0	0	0	0	0	0	0	0	0	0	0	1	0	1	1	0	0	0
Ask_Har_11	ASK_HAR	ASK	HAR	E	0	1	0	1	0	1	1	0	0	1	0	1	0	0	0	1	1	0	1	0	1	1	0	1	0	0	1	1	0	0	1	0	0	1	1	0	0	1	0	0	0	1	1	0	0
Ask_Har_12	ASK_HAR	ASK	HAR	E	0	1	0	1	0	0	0	1	0	0	1	1	0	0	0	1	0	0	1	0	1	1	0	1	0	0	1	0	0	0	1	0	1	1	0	0	0	1	0	0	1	1	0	1	0
Ask_Har_13	ASK_HAR	ASK	HAR	E	0	0	0	0	0	0	0	0	0	0	0	1	0	0	0	1	0	0	0	0	0	1	0	1	0	1	1	0	0	0	1	1	0	1	0	0	0	0	0	1	0	0	0	0	0
Ask_Har_14	ASK_HAR	ASK	HAR	H	1	0	0	0	0	0	1	0	0	1	1	0	0	0	0	1	0	0	0	0	1	1	0	0	1	0	1	1	0	0	1	1	0	1	0	0	0	0	0	0	0	0	0	0	0
Ask_Har_15	ASK_HAR	ASK	HAR	H	1	0	0	0	0	0	0	1	0	0	0	1	0	0	0	1	0	0	0	0	0	0	0	1	0	0	1	0	0	0	1	1	0	1	0	0	0	1	0	1	0	0	1	1	0
Ask_Har_16	ASK_HAR	ASK	HAR	E	0	1	0	1	0	0	1	0	0	0	0	1	0	0	0	1	0	0	1	0	0	1	0	1	0	0	1	1	0	0	1	1	0	1	0	0	0	0	1	0	1	0	0	1	0
Ask_Har_17	ASK_HAR	ASK	HAR	H	1	0	0	0	0	0	0	1	1	0	0	1	0	0	0	1	0	0	0	0	0	1	0	1	0	0	1	0	0	0	1	1	0	1	1	0	0	1	0	1	1	0	0	0	0
Ask_Har_18	ASK_HAR	ASK	HAR	H	1	0	1	1	0	0	1	1	1	1	0	1	1	1	0	1	0	0	1	0	0	1	0	0	1	0	1	1	0	0	1	1	0	0	0	0	0	1	0	1	0	0	0	0	0
Ask_Har_19	ASK_HAR	ASK	HAR	E	0	0	1	1	0	0	0	1	0	1	0	1	0	0	0	0	0	0	1	0	0	0	0	1	0	0	1	1	1	0	1	1	0	1	1	0	0	1	0	1	0	0	1	0	0
Ask_Har_20	ASK_HAR	ASK	HAR	E	0	0	0	1	0	1	1	0	0	0	1	0	1	0	1	1	0	0	0	0	1	1	0	1	0	0	1	0	0	0	1	0	0	1	1	0	0	0	0	0	1	1	0	1	0
Ask_Har_21	ASK_HAR	ASK	HAR	H	1	1	0	1	0	0	0	0	0	0	0	1	0	0	0	0	0	0	0	0	0	0	0	1	0	0	1	0	0	0	0	1	0	1	0	0	0	0	0	0	1	0	0	1	0
Ask_Har_22	ASK_HAR	ASK	HAR	H	1	0	1	1	0	1	1	0	1	0	0	0	1	1	0	1	0	0	1	0	0	1	0	0	1	0	1	1	0	0	1	0	0	1	0	0	0	1	0	0	1	0	0	0	1
Ask_Har_23	ASK_HAR	ASK	HAR	H	1	0	1	1	0	0	1	0	0	0	0	0	0	1	0	0	0	0	0	0	0	0	0	1	0	0	1	0	0	0	1	1	0	1	0	0	1	0	1	1	0	0	0	0	0
Ask_Har_24	ASK_HAR	ASK	HAR	H	1	0	0	1	0	0	1	0	1	1	0	1	0	0	0	1	0	0	1	0	1	1	0	1	0	0	1	0	0	0	0	1	0	1	0	0	0	0	0	1	0	1	0	0	0
Ask_Har_25	ASK_HAR	ASK	HAR	T	2	1	1	0	0	1	1	1	1	0	0	0	0	1	0	1	1	1	0	0	1	1	1	1	1	0	1	0	1	0	1	1	0	1	0	1	0	0	0	0	1	1	1	0	0
Ask_Har_26	ASK_HAR	ASK	HAR	E	0	1	1	0	0	0	1	1	1	1	0	1	0	0	0	1	0	1	1	0	1	1	0	1	1	0	1	1	1	0	1	1	0	1	1	1	1	0	0	1	0	1	0	1	1
Ask_Har_27	ASK_HAR	ASK	HAR	T	2	0	0	1	0	1	0	0	0	0	0	1	0	0	0	1	0	0	0	0	0	1	0	0	0	0	1	0	0	1	0	0	0	1	0	1	1	0	0	1	0	0	0	0	1
Ask_Har_28	ASK_HAR	ASK	HAR	E	0	0	1	0	0	0	1	0	0	0	0	0	0	0	0	0	0	0	0	0	0	0	0	0	0	0	1	0	0	0	1	1	0	1	0	0	0	0	0	0	0	1	0	0	1
Ask_Har_29	ASK_HAR	ASK	HAR	H	1	0	0	0	0	0	0	0	0	0	0	0	0	0	0	1	1	0	0	0	0	0	0	0	0	0	1	0	0	0	1	1	0	1	0	1	0	0	0	0	1	1	1	0	0
Ask_Har_30	ASK_HAR	ASK	HAR	E	0	0	0	0	0	0	0	0	1	1	0	0	0	0	0	0	0	0	0	0	0	0	0	1	0	0	1	0	0	0	1	1	0	0	0	0	1	0	0	0	0	1	0	0	0
Ask_Ref_01	ASK_REF	ASK	REF	H	1	1	0	0	0	1	0	1	0	1	0	0	0	0	0	0	1	0	0	0	1	1	0	1	1	0	1	1	0	0	1	0	1	1	0	1	1	0	0	0	0	0	0	0	0
Ask_Ref_02	ASK_REF	ASK	REF	E	0	1	1	1	0	1	0	0	1	1	0	1	1	0	0	0	0	0	1	0	1	1	0	1	1	0	1	0	0	0	1	0	0	1	1	0	1	0	0	1	1	0	0	0	0
Ask_Ref_03	ASK_REF	ASK	REF	H	1	1	1	1	0	0	0	1	1	0	0	0	0	1	1	1	0	0	0	0	0	1	0	0	1	0	1	0	0	0	1	1	0	0	0	0	0	0	0	1	1	0	0	1	0
Ask_Ref_04	ASK_REF	ASK	REF	H	1	1	0	1	0	1	1	0	0	1	0	1	0	0	0	0	0	0	0	0	1	0	0	1	1	0	1	1	0	0	1	1	0	0	0	0	0	1	0	0	0	1	0	0	1
Ask_Ref_06	ASK_REF	ASK	REF	E	0	0	0	0	0	0	0	0	1	1	0	0	0	1	0	1	0	0	0	0	0	0	0	0	0	0	1	0	0	0	1	1	0	1	0	0	0	0	0	0	0	1	0	0	0
Ask_Ref_07	ASK_REF	ASK	REF	T	2	1	0	0	0	0	0	0	0	0	0	0	0	0	0	0	0	0	0	0	0	1	0	1	1	0	0	0	0	0	0	1	0	1	1	0	1	1	0	1	0	0	0	0	0
Ask_Ref_08	ASK_REF	ASK	REF	E	0	0	0	1	0	1	0	0	0	0	0	0	0	1	0	0	0	0	1	0	1	0	0	1	0	0	1	0	1	0	1	0	0	1	0	0	1	0	0	0	0	0	0	0	0
Ask_Ref_10	ASK_REF	ASK	REF	H	1	0	0	0	0	0	0	0	1	1	1	1	0	0	0	0	1	0	1	0	0	1	0	1	0	0	1	0	0	0	1	1	1	1	0	0	1	0	0	0	0	1	1	1	0
Ask_Ref_11	ASK_REF	ASK	REF	E	0	1	1	0	0	1	0	0	0	1	0	1	0	1	0	1	1	0	0	0	0	1	0	1	0	0	1	0	0	0	1	1	0	1	0	0	0	1	0	1	0	0	0	0	0
Ask_Ref_12	ASK_REF	ASK	REF	T	2	0	0	0	0	0	0	0	0	1	1	0	1	0	0	0	0	0	0	0	0	0	1	1	0	0	1	0	0	0	1	1	0	1	0	0	0	0	0	0	0	1	0	0	0
Ask_Ref_13	ASK_REF	ASK	REF	E	0	1	0	0	0	0	0	0	0	0	0	1	0	0	0	0	1	0	0	0	0	0	0	1	0	0	1	0	0	0	1	1	0	0	0	1	0	0	0	0	1	0	0	0	0
Ask_Ref_14	ASK_REF	ASK	REF	T	2	0	0	1	1	0	0	0	1	0	0	1	0	0	0	1	1	0	0	0	0	1	0	1	0	0	1	0	0	0	1	1	0	1	0	0	0	0	0	0	1	1	0	0	0
Ask_Ref_16	ASK_REF	ASK	REF	H	1	0	0	0	0	0	0	0	0	0	0	1	0	0	0	1	1	0	0	0	1	1	0	1	0	0	1	1	0	0	0	1	1	1	0	0	0	0	0	0	1	0	0	1	0
Ask_Ref_17	ASK_REF	ASK	REF	H	1	0	0	1	0	0	0	0	0	0	0	0	0	0	0	1	1	0	0	0	0	1	0	1	0	0	1	0	0	0	1	1	0	1	0	0	1	0	0	1	1	1	0	1	0
Ask_Ref_18	ASK_REF	ASK	REF	H	1	1	0	1	0	0	1	0	1	0	0	0	0	0	0	1	0	1	0	0	0	1	0	0	1	0	1	0	0	0	0	0	0	1	0	0	0	0	0	0	1	0	0	0	0
Ask_Ref_19	ASK_REF	ASK	REF	T	2	1	0	1	0	0	0	0	0	1	0	0	0	0	0	1	0	1	1	0	1	1	1	0	0	0	1	1	0	0	1	1	1	1	0	0	0	1	0	1	0	1	0	1	0
Ask_Ref_22	ASK_REF	ASK	REF	H	1	0	1	1	0	1	1	1	0	0	0	0	0	0	0	1	0	0	0	0	0	1	0	1	0	0	1	1	0	0	1	1	0	1	0	0	0	0	0	1	0	1	1	1	1
Ask_Ref_23	ASK_REF	ASK	REF	H	1	0	0	1	0	0	0	1	0	0	0	1	0	0	0	0	0	0	0	0	0	0	0	0	1	0	1	0	0	0	1	0	0	1	0	0	0	0	0	0	1	0	0	0	0
Ask_Ref_24	ASK_REF	ASK	REF	H	1	0	0	0	0	0	0	0	0	0	0	1	0	1	0	1	0	0	0	0	0	1	0	0	0	0	1	0	0	0	1	1	0	1	0	0	0	0	0	1	0	1	0	1	0
Ask_Ref_25	ASK_REF	ASK	REF	T	2	0	0	0	0	0	0	0	1	0	0	1	0	0	0	1	0	0	0	0	0	0	0	0	0	0	1	0	0	0	1	1	0	1	0	0	0	0	0	0	0	1	0	1	0
Ask_Ref_26	ASK_REF	ASK	REF	H	1	1	0	1	0	0	1	1	0	0	0	1	0	0	0	1	0	0	0	1	1	1	0	1	0	0	1	0	0	0	1	1	0	1	0	0	0	0	0	0	1	0	0	0	0
Ask_Ref_27	ASK_REF	ASK	REF	H	1	1	1	1	0	1	0	0	1	0	0	1	0	0	0	1	0	0	0	0	0	1	0	0	0	0	1	0	0	1	1	1	0	0	0	0	0	0	0	0	0	0	0	0	0
Ask_Ref_28	ASK_REF	ASK	REF	H	1	1	0	1	0	1	1	0	1	0	0	1	0	0	0	1	1	0	0	0	1	0	0	1	0	0	1	0	0	0	1	1	0	1	0	0	0	0	0	0	1	1	1	0	0
Ask_Ref_29	ASK_REF	ASK	REF	E	0	1	0	1	0	1	1	0	0	0	0	1	0	0	1	1	0	0	0	0	1	1	0	1	1	0	1	0	0	0	1	0	0	1	0	0	0	0	0	0	1	0	0	1	0
Ask_Ref_30	ASK_REF	ASK	REF	H	1	1	0	0	0	0	0	0	0	0	0	0	0	1	1	0	0	0	0	0	0	0	0	1	0	0	1	0	0	0	1	1	0	0	0	0	0	0	0	1	0	1	0	0	1
TVA_Har_01	TVA_HAR	TVA	HAR	H	1	1	0	0	0	0	1	1	0	1	0	0	0	0	0	1	0	0	1	0	0	1	0	0	0	0	1	0	0	0	1	0	1	1	0	0	0	0	0	0	0	1	1	1	0
TVA_Har_04	TVA_HAR	TVA	HAR	E	0	1	1	0	1	0	1	1	0	0	0	0	0	0	1	0	0	0	1	0	1	1	1	0	1	0	1	0	1	0	0	0	1	1	1	0	0	0	0	0	0	1	0	1	0
TVA_Har_06	TVA_HAR	TVA	HAR	H	1	0	0	1	0	0	1	0	1	0	0	1	0	0	0	1	0	0	0	0	0	0	0	1	0	0	1	0	0	0	1	1	1	0	0	0	0	0	0	0	1	1	1	0	0
TVA_Har_07	TVA_HAR	TVA	HAR	T	2	1	0	1	1	1	1	0	1	1	0	0	0	0	0	1	0	0	0	1	0	1	0	0	1	1	1	1	0	0	1	1	0	1	0	0	0	1	0	1	0	1	1	0	1
TVA_Har_08	TVA_HAR	TVA	HAR	NA	NA	0	0	1	0	1	1	0	1	1	0	1	0	0	0	0	1	0	0	0	0	0	0	0	0	0	1	0	0	0	1	1	0	1	0	0	0	0	0	1	0	0	0	1	0
TVA_Har_09	TVA_HAR	TVA	HAR	H	1	0	0	1	0	0	0	0	0	1	0	1	0	0	0	1	0	0	0	0	0	1	0	0	0	0	1	0	0	0	1	0	0	1	0	0	0	0	0	0	0	1	0	1	0
TVA_Har_10	TVA_HAR	TVA	HAR	E	0	1	0	1	0	1	1	1	0	0	0	1	0	0	0	1	0	1	0	1	1	0	0	0	1	0	1	0	0	0	1	0	1	1	0	0	0	1	0	1	1	1	0	1	0
TVA_Har_11	TVA_HAR	TVA	HAR	H	1	1	0	0	0	0	0	0	1	1	0	1	0	0	0	0	0	0	1	0	0	1	0	0	0	0	1	1	1	0	1	0	1	1	0	0	0	0	0	1	0	1	0	1	0
TVA_Har_12	TVA_HAR	TVA	HAR	H	1	0	0	0	0	0	0	0	1	1	0	1	0	0	0	0	0	0	0	0	0	0	0	1	0	0	1	0	0	0	1	1	0	1	0	0	0	0	0	0	1	1	0	0	0
TVA_Har_13	TVA_HAR	TVA	HAR	E	0	0	0	1	0	1	0	1	0	0	1	0	0	0	0	1	0	0	1	0	0	0	0	0	1	0	1	0	0	0	1	1	0	1	0	0	1	0	0	1	1	0	0	0	0
TVA_Har_14	TVA_HAR	TVA	HAR	E	0	0	0	0	0	1	0	0	1	0	0	1	0	0	0	1	0	0	1	0	0	0	0	1	0	0	1	0	0	0	1	1	0	0	0	0	0	0	0	0	1	1	0	0	0
TVA_Har_15	TVA_HAR	TVA	HAR	E	0	1	1	1	0	0	1	1	1	1	0	1	0	0	0	0	1	1	0	0	0	0	0	1	1	0	1	0	0	0	1	1	0	1	1	0	1	0	0	1	0	1	0	0	0
TVA_Har_16	TVA_HAR	TVA	HAR	H	1	0	1	1	0	1	0	0	0	1	1	1	0	1	0	1	0	0	1	0	0	1	0	0	1	0	1	0	1	0	1	1	0	1	0	0	0	0	0	0	0	0	0	0	0
TVA_Har_17	TVA_HAR	TVA	HAR	H	1	1	0	0	0	1	0	0	0	0	0	1	0	0	0	1	0	0	0	0	1	0	0	1	0	0	1	0	0	0	1	1	0	1	0	0	0	0	0	1	0	1	0	0	0
TVA_Har_18	TVA_HAR	TVA	HAR	H	1	0	0	1	0	0	0	0	0	0	0	1	0	0	0	1	0	0	0	0	0	1	0	0	0	0	1	0	0	0	1	1	0	1	0	0	0	0	0	0	0	1	0	1	0
TVA_Har_19	TVA_HAR	TVA	HAR	E	0	1	0	1	0	1	0	0	0	0	1	1	0	0	0	1	0	0	0	0	0	0	0	1	1	0	1	0	0	0	1	1	0	0	1	0	0	0	0	1	0	0	1	0	0
TVA_Har_20	TVA_HAR	TVA	HAR	H	1	1	1	1	0	1	0	1	0	1	0	1	0	0	0	1	1	0	0	1	0	1	0	0	1	1	1	0	1	0	1	1	0	1	1	1	0	1	0	1	0	0	0	0	0
TVA_Har_21	TVA_HAR	TVA	HAR	H	1	1	1	1	0	0	0	0	0	1	0	1	0	0	0	0	0	0	0	0	0	0	0	1	0	0	1	0	0	0	1	0	1	1	1	0	0	1	0	0	0	0	1	1	0
TVA_Har_22	TVA_HAR	TVA	HAR	H	1	1	1	0	0	0	1	1	0	0	0	0	0	1	0	1	0	1	0	0	0	0	1	0	0	0	1	0	0	0	1	1	0	1	0	0	0	0	0	1	0	1	1	0	0
TVA_Har_23	TVA_HAR	TVA	HAR	E	0	0	1	1	0	0	0	0	1	0	0	0	0	0	0	0	0	0	0	0	0	0	0	1	0	0	1	0	0	0	0	1	0	1	0	0	0	0	0	0	0	0	0	0	0
TVA_Har_25	TVA_HAR	TVA	HAR	E	0	0	1	1	0	0	1	1	0	0	0	1	0	0	0	1	0	0	0	0	0	0	0	1	1	0	1	0	0	0	1	1	0	1	0	0	0	1	0	1	1	1	1	1	0
TVA_Har_27	TVA_HAR	TVA	HAR	E	0	1	0	0	0	0	0	0	1	0	1	1	0	0	0	0	0	0	1	0	0	0	0	1	0	0	1	0	0	0	0	1	0	0	0	0	0	0	0	0	1	0	0	1	0
TVA_Har_28	TVA_HAR	TVA	HAR	H	1	1	0	1	0	0	0	0	1	0	0	1	0	0	0	1	1	0	0	0	0	1	0	0	0	1	1	0	0	0	1	1	0	1	1	0	0	0	0	1	1	1	1	1	0
TVA_Har_29	TVA_HAR	TVA	HAR	H	1	1	0	1	0	0	1	0	0	0	1	0	0	0	0	1	0	0	0	0	0	0	1	1	0	0	1	0	0	0	1	1	0	0	0	0	0	1	0	0	0	0	0	0	0
TVA_Har_30	TVA_HAR	TVA	HAR	H	1	1	0	0	0	0	0	1	0	0	0	1	0	0	0	1	1	0	1	0	0	0	0	1	0	0	1	0	0	0	1	1	0	1	0	0	0	0	0	0	0	1	1	0	0
TVA_Ref_01	TVA_REF	TVA	REF	T	2	0	0	1	1	0	0	0	0	1	0	1	0	0	0	1	1	0	0	0	0	1	0	0	1	0	1	0	0	0	1	1	0	1	0	0	0	1	0	0	1	1	0	0	0
TVA_Ref_02	TVA_REF	TVA	REF	E	0	0	1	1	0	0	0	0	0	0	0	1	0	0	0	1	0	0	0	0	0	1	0	1	0	0	1	0	0	0	1	0	0	0	0	0	0	0	0	1	0	0	0	1	0
TVA_Ref_03	TVA_REF	TVA	REF	E	0	0	0	1	0	0	0	0	1	1	0	1	0	0	0	0	1	0	1	0	0	0	0	0	0	0	1	0	0	0	1	0	0	1	0	0	1	0	0	0	1	0	0	0	0
TVA_Ref_04	TVA_REF	TVA	REF	H	1	0	0	0	0	0	0	0	1	0	0	0	0	0	0	1	1	0	0	0	0	1	0	1	0	0	1	0	0	0	1	1	0	0	0	0	1	0	0	0	0	0	0	0	0
TVA_Ref_05	TVA_REF	TVA	REF	E	0	0	0	1	0	1	0	1	0	1	0	1	0	0	0	1	0	0	0	0	0	0	0	0	1	0	1	0	0	0	1	1	0	1	0	0	0	0	0	0	1	0	0	0	0
TVA_Ref_06	TVA_REF	TVA	REF	H	1	0	0	1	0	0	1	1	0	0	0	0	0	0	0	0	0	0	0	0	0	0	0	1	0	0	1	0	1	0	1	0	0	1	0	0	0	0	0	0	0	0	0	1	0
TVA_Ref_07	TVA_REF	TVA	REF	T	2	0	0	0	0	1	1	0	0	0	1	1	0	0	0	1	0	1	0	0	0	0	0	1	0	0	1	0	0	0	1	1	0	1	0	0	1	0	0	0	0	0	1	0	0
TVA_Ref_08	TVA_REF	TVA	REF	E	0	1	0	1	0	1	0	0	0	0	0	1	0	0	0	0	0	0	0	1	0	0	0	1	0	0	1	1	0	0	1	1	0	0	0	0	0	0	0	0	0	0	0	1	0
TVA_Ref_09	TVA_REF	TVA	REF	NA	NA	1	1	1	0	0	0	0	0	1	0	0	0	0	0	1	0	0	0	0	0	0	0	1	0	0	1	0	0	0	1	0	0	1	0	0	0	0	0	0	0	0	0	0	0
TVA_Ref_10	TVA_REF	TVA	REF	H	1	0	0	0	0	0	1	0	0	0	0	0	0	0	0	1	0	0	0	0	0	1	0	1	0	0	1	1	0	0	1	1	0	1	0	0	0	0	0	0	1	1	0	0	0
TVA_Ref_11	TVA_REF	TVA	REF	E	0	0	1	0	0	0	0	0	1	0	0	1	0	0	0	0	0	0	1	0	0	1	0	1	0	0	1	0	0	0	1	1	0	1	0	0	0	0	0	0	0	1	0	0	0
TVA_Ref_12	TVA_REF	TVA	REF	H	1	0	0	0	0	1	0	1	0	0	0	1	0	0	0	1	0	0	0	0	0	1	0	0	1	0	1	0	1	0	0	1	0	1	1	0	1	1	0	0	0	0	0	0	0
TVA_Ref_13	TVA_REF	TVA	REF	E	0	1	0	1	0	1	0	1	1	0	0	1	1	1	0	1	0	0	0	1	0	1	0	0	1	1	1	0	0	0	1	1	0	1	0	0	0	0	0	0	1	1	0	1	0
TVA_Ref_14	TVA_REF	TVA	REF	H	1	1	1	1	0	0	1	0	0	0	0	1	0	1	0	0	1	1	0	0	0	1	0	0	1	0	1	1	0	0	1	1	0	1	0	0	1	1	0	1	1	1	0	1	0
TVA_Ref_15	TVA_REF	TVA	REF	H	1	1	0	0	0	0	0	0	0	0	0	0	1	0	1	1	1	0	0	0	0	0	0	1	0	0	1	0	1	0	1	0	1	1	0	0	1	0	1	0	0	1	0	0	0
TVA_Ref_16	TVA_REF	TVA	REF	E	0	1	0	1	0	0	0	0	1	1	0	1	0	0	0	0	0	0	0	0	0	1	0	1	0	0	1	1	0	0	1	1	0	1	0	0	0	0	0	1	0	1	1	0	0
TVA_Ref_17	TVA_REF	TVA	REF	T	2	1	0	1	0	1	0	0	0	0	1	0	0	0	0	1	0	0	0	1	0	1	0	1	1	0	1	0	0	0	1	1	0	0	0	0	0	0	0	0	1	1	0	0	0
TVA_Ref_18	TVA_REF	TVA	REF	H	1	1	1	1	0	0	0	1	1	1	0	0	0	0	0	1	0	0	0	0	0	0	1	1	0	0	1	0	1	0	1	1	0	0	0	0	0	0	0	0	1	1	0	1	1
TVA_Ref_20	TVA_REF	TVA	REF	H	1	0	0	1	1	1	0	0	0	0	0	0	0	1	0	1	0	0	0	0	1	1	0	0	0	0	1	0	0	0	0	1	0	0	0	0	0	0	0	0	0	0	0	0	0
TVA_Ref_21	TVA_REF	TVA	REF	T	2	0	0	0	0	1	0	1	0	0	0	1	0	0	0	1	1	0	1	0	0	1	0	1	0	0	1	0	0	0	1	1	0	1	0	0	1	1	0	1	0	0	1	1	0
TVA_Ref_22	TVA_REF	TVA	REF	H	1	1	0	1	0	0	0	0	0	0	0	0	0	0	0	0	0	0	0	0	0	0	0	0	0	0	1	0	0	0	1	1	0	0	0	0	0	0	0	0	1	1	0	0	1
TVA_Ref_23	TVA_REF	TVA	REF	T	2	0	1	1	0	0	1	0	0	0	0	1	0	1	0	1	1	0	0	0	0	1	1	1	0	0	1	0	0	0	1	1	0	1	0	0	0	0	0	0	1	1	0	1	0
TVA_Ref_24	TVA_REF	TVA	REF	T	2	0	0	0	0	0	0	0	1	0	0	1	0	0	1	1	0	0	0	0	0	0	0	1	0	0	1	1	0	0	1	1	0	1	0	0	0	0	0	0	0	1	1	0	0
TVA_Ref_25	TVA_REF	TVA	REF	H	1	0	0	1	0	0	0	0	1	0	0	1	0	0	0	1	1	0	0	0	0	0	1	1	0	0	1	0	0	1	1	1	0	1	0	0	0	0	0	1	1	0	1	0	0
TVA_Ref_26	TVA_REF	TVA	REF	H	1	0	0	1	0	0	0	0	0	0	0	1	0	0	0	1	1	0	0	1	1	1	0	1	0	0	1	0	0	0	1	1	0	1	1	0	1	1	0	1	1	1	0	0	0
TVA_Ref_29	TVA_REF	TVA	REF	H	1	1	0	0	0	0	0	0	0	1	1	1	0	0	0	0	0	0	0	0	0	1	0	0	0	0	1	1	0	0	1	1	1	1	0	0	1	1	0	1	1	0	1	0	0
TVA_Ref_30	TVA_REF	TVA	REF	E	0	0	0	0	0	0	0	0	0	0	0	1	1	0	0	1	0	0	0	0	0	1	0	0	1	0	1	0	1	0	1	1	0	1	0	0	0	1	0	0	0	1	0	0	1
Kar_Har_02	KAR_HAR	KAR	HAR	E	0	0	0	1	0	0	0	0	0	0	0	0	0	0	0	1	0	0	0	0	0	0	0	1	0	0	1	0	0	0	1	1	0	1	0	0	0	0	0	1	0	1	0	0	0
Kar_Har_03	KAR_HAR	KAR	HAR	NA	NA	0	0	0	0	0	1	1	1	1	0	0	0	0	0	1	0	0	0	0	0	0	0	0	0	0	1	0	0	0	1	1	0	0	0	0	0	0	1	0	1	1	0	0	1
Kar_Har_04	KAR_HAR	KAR	HAR	E	0	1	0	1	0	0	1	1	0	0	1	1	0	0	0	1	0	0	0	0	0	1	0	1	1	0	1	0	0	1	1	0	1	1	0	0	0	0	0	0	1	1	0	0	0
Kar_Har_10	KAR_HAR	KAR	HAR	E	0	1	0	0	0	0	0	0	0	0	0	0	0	0	0	0	0	0	0	0	0	0	0	1	0	0	1	0	0	0	0	0	0	1	0	0	0	0	0	0	0	0	1	0	0
Kar_Har_11	KAR_HAR	KAR	HAR	H	1	1	1	1	0	0	1	1	0	0	0	0	1	0	0	0	0	0	0	0	0	1	0	0	1	0	1	0	0	0	1	0	0	1	0	0	0	0	0	0	0	0	0	0	0
Kar_Har_12	KAR_HAR	KAR	HAR	T	2	1	1	1	0	0	1	0	0	0	1	0	0	1	0	1	0	0	0	0	1	1	0	1	1	0	1	0	1	0	1	1	0	1	0	0	1	0	0	0	0	0	0	1	0
Kar_Har_13	KAR_HAR	KAR	HAR	E	0	0	0	0	0	0	1	0	0	0	0	0	0	0	0	1	0	0	0	0	1	1	0	0	1	0	1	0	0	0	0	0	0	1	0	0	1	0	0	0	0	0	0	0	0
Kar_Har_14	KAR_HAR	KAR	HAR	H	1	1	1	1	0	0	1	0	1	0	1	1	1	0	1	0	0	1	0	0	0	0	0	0	1	0	1	0	1	0	1	0	0	0	1	0	1	0	0	0	0	1	0	0	0
Kar_Har_15	KAR_HAR	KAR	HAR	H	1	0	0	1	0	0	1	0	1	0	0	0	1	0	0	1	0	0	0	0	0	0	0	1	1	0	1	0	0	0	0	0	0	1	0	0	1	0	0	0	0	0	0	0	0
Kar_Har_16	KAR_HAR	KAR	HAR	E	0	1	0	0	0	0	0	0	1	1	0	1	0	0	0	1	0	0	1	0	0	1	0	0	1	0	1	1	0	0	1	1	0	1	0	0	0	0	0	1	1	1	1	0	0
Kar_Har_17	KAR_HAR	KAR	HAR	H	1	1	1	1	0	0	1	1	0	1	0	0	0	0	0	0	0	0	0	0	0	0	0	1	1	1	1	0	0	0	1	0	0	1	0	1	0	0	0	0	1	1	0	0	0
Kar_Har_18	KAR_HAR	KAR	HAR	E	0	0	1	1	0	1	0	1	1	0	0	1	0	1	0	1	0	1	0	0	1	0	0	0	1	1	1	1	1	0	1	1	1	1	1	0	1	0	0	1	0	1	1	0	1
Kar_Har_19	KAR_HAR	KAR	HAR	E	0	0	1	1	0	0	0	1	1	1	1	1	0	0	0	1	0	1	0	1	0	0	0	1	1	0	1	0	0	0	0	0	0	1	0	1	1	0	0	0	0	1	0	0	0
Kar_Har_20	KAR_HAR	KAR	HAR	H	1	0	1	1	0	1	0	0	1	0	1	1	0	0	1	1	1	0	1	0	1	1	0	1	1	0	1	0	0	0	1	1	0	1	0	0	1	1	0	0	1	1	0	0	0
Kar_Har_21	KAR_HAR	KAR	HAR	H	1	1	0	0	1	1	0	1	0	1	0	1	0	0	0	1	0	1	0	0	0	1	0	1	0	0	1	0	0	0	1	1	1	1	0	0	0	1	0	0	1	1	0	0	0
Kar_Har_22	KAR_HAR	KAR	HAR	T	2	1	0	1	0	0	1	0	0	1	0	1	0	0	0	1	1	0	1	0	0	1	0	1	0	1	1	0	0	1	1	1	0	1	0	1	0	0	0	1	1	0	0	0	0
Kar_Har_23	KAR_HAR	KAR	HAR	E	0	0	0	0	0	1	0	0	0	0	1	1	0	0	0	1	1	0	1	1	1	1	0	1	0	1	1	0	0	0	1	1	0	1	0	0	1	0	0	0	1	1	1	0	0
Kar_Har_24	KAR_HAR	KAR	HAR	H	1	0	0	0	0	0	0	0	0	0	0	0	0	0	0	1	0	0	0	0	0	0	0	0	0	0	1	0	0	0	1	1	0	0	0	0	0	0	0	0	0	1	0	0	0
Kar_Har_25	KAR_HAR	KAR	HAR	T	2	0	0	0	0	0	0	0	1	0	0	0	0	0	0	0	0	0	0	0	0	1	0	0	1	0	1	0	0	0	0	0	0	1	0	0	0	0	0	0	0	0	0	0	0
Kar_Har_26	KAR_HAR	KAR	HAR	E	0	1	1	1	0	0	1	0	1	1	0	1	0	1	0	1	0	0	1	0	1	0	0	0	1	0	1	0	0	0	1	1	0	1	0	0	1	1	0	0	0	0	0	1	1
Kar_Har_27	KAR_HAR	KAR	HAR	H	1	0	0	0	0	0	0	0	0	1	0	1	0	0	0	0	0	0	0	0	1	1	0	1	0	0	1	0	0	0	1	1	0	1	0	0	0	0	0	0	0	0	1	0	0
Kar_Har_28	KAR_HAR	KAR	HAR	T	2	0	0	1	0	0	0	1	0	1	0	0	0	1	0	1	0	0	0	0	1	1	0	0	0	0	1	0	1	0	0	0	0	1	0	0	0	1	0	0	0	1	0	0	0
Kar_Har_29	KAR_HAR	KAR	HAR	NA	NA	0	0	1	0	1	1	0	1	0	1	0	0	0	0	1	0	0	0	0	0	1	0	0	1	1	1	1	0	0	0	0	1	1	0	0	0	0	0	0	1	0	0	0	0
Kar_Har_30	KAR_HAR	KAR	HAR	NA	NA	1	0	1	0	1	1	0	1	0	0	0	0	0	0	1	0	0	0	1	1	1	0	1	1	0	1	0	0	0	1	1	0	1	0	0	1	1	0	0	0	0	0	0	0
Kar_Ref_04	KAR_REF	KAR	REF	T	2	0	0	1	0	0	0	1	1	1	0	0	0	0	0	1	0	0	0	0	0	0	0	1	0	0	1	0	0	0	1	1	0	1	0	0	0	1	0	0	1	1	0	1	1
Kar_Ref_05	KAR_REF	KAR	REF	NA	NA	1	0	1	1	0	1	0	1	1	1	1	0	0	0	1	1	0	1	0	0	1	0	1	1	0	1	0	0	0	1	1	0	1	0	0	1	1	0	0	0	0	0	0	0
Kar_Ref_06	KAR_REF	KAR	REF	NA	NA	0	1	1	0	0	1	0	1	1	0	1	0	1	1	0	1	0	1	0	1	1	0	1	1	1	1	1	0	0	1	1	0	1	0	0	1	1	0	0	1	1	0	1	0
Kar_Ref_07	KAR_REF	KAR	REF	E	0	0	0	1	0	1	0	0	0	0	0	1	0	0	0	1	0	0	1	0	1	0	0	1	0	0	1	0	0	0	1	1	0	1	0	0	0	0	0	0	1	0	1	0	0
Kar_Ref_08	KAR_REF	KAR	REF	E	0	0	0	0	0	0	0	0	0	0	0	1	0	0	0	1	0	0	0	0	0	0	0	0	0	0	1	0	0	0	1	0	1	1	0	0	0	0	0	0	1	0	0	1	0
Kar_Ref_09	KAR_REF	KAR	REF	NA	NA	1	0	1	0	0	1	0	0	1	0	0	1	0	0	1	1	0	0	0	0	1	0	0	1	0	1	0	0	0	1	0	0	1	0	0	0	1	0	0	0	1	0	0	0
Kar_Ref_10	KAR_REF	KAR	REF	E	0	0	0	0	0	0	0	0	0	0	0	1	0	0	0	1	0	0	0	0	1	0	0	0	0	1	1	0	0	0	0	0	0	1	0	0	0	0	0	1	0	0	0	0	0
Kar_Ref_11	KAR_REF	KAR	REF	H	1	1	0	1	0	0	1	1	1	1	0	1	0	0	0	1	0	0	1	0	0	1	1	0	1	0	1	0	0	0	1	0	1	1	0	0	0	0	0	0	0	1	0	1	0
Kar_Ref_12	KAR_REF	KAR	REF	H	1	0	1	1	1	1	0	0	1	0	1	1	0	0	0	1	1	1	1	0	1	1	0	0	1	0	1	0	0	0	0	1	1	1	1	0	1	1	0	0	1	0	0	1	0
Kar_Ref_13	KAR_REF	KAR	REF	H	1	0	0	1	0	0	0	1	0	0	0	1	0	0	0	0	1	0	0	0	0	0	0	1	0	0	1	0	0	0	1	0	0	1	0	0	0	0	0	0	0	1	0	1	0
Kar_Ref_14	KAR_REF	KAR	REF	NA	NA	1	0	0	0	1	0	0	1	1	0	1	0	0	0	0	0	1	0	1	1	1	0	1	1	0	1	0	0	0	1	1	0	1	1	0	0	0	0	1	1	1	0	1	0
Kar_Ref_15	KAR_REF	KAR	REF	NA	NA	0	1	1	0	0	0	1	0	1	0	1	0	0	0	1	0	0	0	0	0	1	0	1	1	1	1	0	0	0	1	0	0	1	0	0	0	1	0	0	0	0	0	1	0
Kar_Ref_16	KAR_REF	KAR	REF	T	2	0	0	1	0	0	1	1	1	1	0	1	0	0	0	1	1	0	0	0	0	1	0	0	1	0	1	0	0	0	0	0	0	1	0	0	1	1	0	0	0	0	1	0	0
Kar_Ref_17	KAR_REF	KAR	REF	E	0	1	1	1	0	1	0	1	1	0	1	1	0	0	0	1	0	0	0	1	0	1	1	1	0	0	1	0	0	0	1	1	0	1	0	0	1	0	0	0	1	0	0	1	0
Kar_Ref_18	KAR_REF	KAR	REF	E	0	1	1	1	0	1	1	0	0	0	0	1	0	1	0	1	0	0	0	0	0	0	1	1	0	0	1	1	0	0	0	1	1	1	0	0	0	1	1	0	0	1	0	0	0
Kar_Ref_19	KAR_REF	KAR	REF	H	1	0	0	0	0	1	0	0	1	0	0	1	0	0	0	1	0	0	0	0	0	0	0	0	0	0	1	0	0	0	1	0	0	0	0	0	0	0	0	1	0	0	1	0	0
Kar_Ref_20	KAR_REF	KAR	REF	H	1	1	0	1	0	1	1	1	1	0	1	1	0	0	0	1	1	1	0	0	0	0	0	1	1	0	0	0	0	0	1	0	0	1	0	0	0	0	0	0	0	0	0	0	0
Kar_Ref_21	KAR_REF	KAR	REF	NA	NA	1	1	1	0	0	1	1	1	1	0	1	0	1	0	1	1	0	0	1	1	1	0	0	1	1	1	0	0	0	1	0	1	1	1	0	1	1	0	0	0	1	0	1	1
Kar_Ref_22	KAR_REF	KAR	REF	H	1	0	0	0	0	0	0	1	0	1	0	0	0	0	1	1	0	0	0	0	0	0	0	0	0	0	1	0	0	0	0	1	0	0	0	0	0	0	0	0	1	1	0	0	1
Kar_Ref_23	KAR_REF	KAR	REF	E	0	0	0	0	0	0	0	0	0	0	0	0	0	1	1	1	0	0	0	0	0	0	0	1	0	0	1	0	0	0	0	1	0	0	0	0	0	0	0	0	1	1	1	0	1
Kar_Ref_24	KAR_REF	KAR	REF	NA	NA	0	0	1	0	0	0	0	0	1	0	1	0	0	0	1	0	0	0	0	0	1	0	1	0	0	1	0	0	1	1	1	0	1	0	1	0	0	0	0	0	1	1	0	0
Kar_Ref_25	KAR_REF	KAR	REF	E	0	1	0	1	0	0	0	0	1	0	0	0	0	0	0	1	0	0	0	0	0	0	0	0	0	0	1	0	0	0	0	1	0	1	0	0	0	0	0	0	0	1	0	0	1
Kar_Ref_26	KAR_REF	KAR	REF	H	1	0	0	0	0	0	0	0	0	0	0	0	0	0	0	1	0	0	0	0	0	0	0	0	0	0	1	0	0	0	0	0	0	1	0	0	0	0	0	0	0	0	0	1	0
Kar_Ref_27	KAR_REF	KAR	REF	E	0	0	1	0	0	0	1	0	1	0	0	1	0	0	0	1	1	0	1	0	0	1	1	1	0	0	1	0	0	0	1	1	1	1	0	0	0	1	0	1	0	1	0	1	0
Kar_Ref_28	KAR_REF	KAR	REF	E	0	0	0	0	0	0	0	1	0	1	0	1	0	0	0	0	0	0	0	0	0	1	0	1	0	0	1	0	0	0	1	1	1	1	1	0	0	0	0	0	1	1	0	1	0
Kar_Ref_29	KAR_REF	KAR	REF	E	0	0	0	0	0	0	0	0	0	0	1	1	0	0	0	1	1	0	0	0	0	1	0	0	0	0	1	0	0	0	1	1	1	0	0	1	0	0	0	0	0	0	0	0	0
Kar_Ref_30	KAR_REF	KAR	REF	E	0	1	0	1	0	0	0	0	1	1	0	1	0	0	1	0	0	1	1	0	0	1	0	1	0	0	1	0	0	0	1	1	0	1	0	0	0	1	0	0	0	0	0	1	0
GDA_Har_01	GDA_HAR	GDA	HAR	T	2	1	0	1	0	0	0	0	1	0	0	1	0	0	0	1	0	1	0	0	0	0	0	1	1	0	1	0	0	0	1	1	0	1	0	0	0	0	0	0	1	0	1	1	0
GDA_Har_02	GDA_HAR	GDA	HAR	H	1	0	0	0	0	1	1	0	0	1	1	0	0	0	0	1	1	0	1	1	0	0	0	0	0	0	1	0	0	0	1	1	0	1	0	0	0	0	0	0	0	1	0	0	0
GDA_Har_03	GDA_HAR	GDA	HAR	E	0	1	0	1	0	0	0	0	0	1	0	0	0	0	0	1	1	0	0	0	1	1	0	1	1	0	1	0	0	0	1	1	0	1	1	0	1	1	0	0	0	1	0	1	0
GDA_Har_04	GDA_HAR	GDA	HAR	E	0	0	0	0	0	0	0	0	1	0	0	1	0	0	0	1	0	0	0	0	0	1	0	1	0	0	1	0	0	0	1	1	0	1	0	0	0	0	0	0	0	0	0	0	0
GDA_Har_05	GDA_HAR	GDA	HAR	H	1	0	0	1	0	0	0	0	1	0	0	1	0	0	0	1	0	0	0	0	1	1	0	0	0	0	1	0	0	0	1	0	1	1	0	0	1	0	0	1	0	1	0	0	0
GDA_Har_06	GDA_HAR	GDA	HAR	T	2	0	1	1	0	0	0	0	1	1	0	1	0	0	1	1	0	0	0	0	1	1	0	0	0	0	1	0	0	0	1	0	1	1	0	0	0	0	0	1	0	0	1	0	0
GDA_Har_07	GDA_HAR	GDA	HAR	H	1	1	1	1	0	0	1	1	0	1	0	1	0	0	0	1	0	0	0	1	0	1	1	0	1	1	1	1	0	0	1	1	0	1	1	0	1	0	0	0	1	0	1	1	1
GDA_Har_08	GDA_HAR	GDA	HAR	E	0	0	0	0	0	0	0	0	1	1	0	1	0	0	0	1	0	0	0	0	0	0	1	0	0	0	1	0	0	0	0	1	0	1	0	0	1	1	0	1	1	1	1	0	0
GDA_Har_09	GDA_HAR	GDA	HAR	H	1	0	0	1	0	1	0	1	0	0	0	1	0	0	0	1	1	0	0	0	0	1	0	0	1	0	1	0	0	0	1	1	1	1	0	0	1	0	0	0	0	0	0	0	0
GDA_Har_10	GDA_HAR	GDA	HAR	H	1	0	1	1	0	1	0	1	1	1	0	1	0	0	0	1	0	0	0	0	1	1	0	1	1	0	1	1	0	0	1	1	1	1	1	0	1	0	0	1	0	1	0	0	0
GDA_Har_11	GDA_HAR	GDA	HAR	E	0	0	1	1	0	0	1	0	1	0	0	1	0	0	0	1	1	1	1	0	1	0	0	1	1	1	1	0	1	0	1	1	0	1	1	0	1	1	0	0	0	1	0	1	0
GDA_Har_12	GDA_HAR	GDA	HAR	E	0	1	0	0	0	0	0	0	0	1	0	1	0	0	0	0	0	0	0	0	0	0	0	1	0	0	1	0	0	0	1	1	0	1	0	1	0	0	0	0	1	0	1	0	0
GDA_Har_13	GDA_HAR	GDA	HAR	H	1	0	0	1	0	1	0	0	1	0	0	0	1	0	0	0	1	0	0	0	0	0	0	1	0	0	1	0	0	0	1	1	0	1	0	1	0	1	0	0	1	0	0	0	0
GDA_Har_14	GDA_HAR	GDA	HAR	E	0	0	0	0	1	0	1	1	0	0	0	1	0	0	0	1	0	0	0	0	0	0	0	1	0	0	1	0	0	0	1	1	0	1	0	0	0	1	0	0	1	1	0	0	0
GDA_Har_21	GDA_HAR	GDA	HAR	T	2	0	0	1	0	1	1	0	0	0	0	1	0	0	0	0	0	0	0	0	0	1	0	0	0	0	1	0	0	0	1	1	0	1	0	0	0	0	1	0	1	1	0	0	0
GDA_Har_22	GDA_HAR	GDA	HAR	E	0	0	0	0	0	0	0	0	1	0	0	1	0	0	0	0	0	0	0	0	0	0	1	1	0	0	1	0	0	0	1	1	0	1	0	0	1	0	0	0	1	1	0	0	0
GDA_Har_23	GDA_HAR	GDA	HAR	E	0	0	0	0	0	0	0	0	0	0	0	0	0	0	0	0	0	0	0	0	0	0	0	0	0	0	1	0	0	0	1	1	0	0	0	1	1	0	0	0	0	1	0	0	0
GDA_Har_24	GDA_HAR	GDA	HAR	E	0	0	0	0	0	0	0	0	0	0	0	0	0	0	0	1	0	0	0	0	0	0	0	0	0	0	1	0	0	0	1	1	0	1	0	0	0	0	0	0	1	1	0	0	1
GDA_Har_25	GDA_HAR	GDA	HAR	E	0	1	0	0	0	0	1	1	0	0	0	0	0	0	0	1	0	0	0	0	0	0	0	1	0	0	1	0	0	0	0	0	1	1	0	0	0	0	0	0	1	1	0	0	1
GDA_Har_26	GDA_HAR	GDA	HAR	H	1	1	0	0	0	0	0	0	1	0	0	1	0	0	0	1	0	0	0	0	0	0	0	0	0	0	1	0	0	0	1	1	0	1	0	1	0	0	0	0	1	1	0	0	1
GDA_Har_27	GDA_HAR	GDA	HAR	H	1	0	1	1	0	0	0	0	0	1	0	0	0	0	0	1	0	0	0	0	0	0	0	0	0	0	1	0	0	0	0	1	0	1	0	0	0	0	0	1	0	1	0	0	1
GDA_Har_28	GDA_HAR	GDA	HAR	E	0	0	0	0	0	0	0	0	0	0	0	1	0	0	0	1	0	0	0	0	0	0	0	0	0	0	1	0	0	0	1	1	0	0	0	0	0	0	0	0	1	0	0	0	1
GDA_Har_29	GDA_HAR	GDA	HAR	E	0	0	0	0	0	0	1	0	0	1	1	0	0	0	0	1	0	0	0	0	0	0	0	0	0	0	1	0	0	0	0	0	1	1	0	0	0	0	0	0	0	0	0	0	0
GDA_Har_30	GDA_HAR	GDA	HAR	E	0	1	1	0	0	0	0	0	0	0	0	0	0	0	0	1	0	0	0	0	0	0	0	0	0	0	1	0	0	0	1	1	0	0	0	1	1	0	0	0	0	1	0	0	0
GDA_Ref_01	GDA_REF	GDA	REF	E	0	0	1	1	0	0	1	0	0	1	0	1	0	0	0	1	0	0	0	0	0	0	0	0	1	0	1	0	0	0	1	0	1	1	0	1	0	0	0	0	0	1	0	0	0
GDA_Ref_02	GDA_REF	GDA	REF	H	1	1	1	1	0	1	0	1	1	0	0	1	0	0	0	1	1	0	0	0	1	1	0	0	1	1	1	1	0	0	0	1	0	1	0	0	0	0	0	0	0	0	0	1	0
GDA_Ref_03	GDA_REF	GDA	REF	E	0	1	0	1	0	1	1	0	0	0	0	1	0	1	0	1	0	0	0	0	1	1	0	0	1	0	1	0	0	0	1	0	0	1	0	0	0	0	0	0	0	1	0	0	0
GDA_Ref_04	GDA_REF	GDA	REF	E	0	1	1	1	0	1	0	1	0	0	1	1	0	0	0	1	0	0	0	0	0	1	1	1	0	0	1	1	0	0	1	1	0	1	0	0	0	0	0	0	1	1	0	0	0
GDA_Ref_05	GDA_REF	GDA	REF	T	2	0	0	1	0	0	0	0	1	0	0	1	0	0	0	0	0	0	0	0	0	0	0	1	0	0	1	0	0	0	1	1	0	1	0	0	0	0	0	0	0	1	0	1	0
GDA_Ref_06	GDA_REF	GDA	REF	H	1	0	1	1	0	1	1	0	1	0	0	0	0	0	0	0	0	0	1	0	0	0	0	1	0	0	1	0	0	0	1	1	0	1	0	0	1	0	0	0	1	1	0	0	0
GDA_Ref_07	GDA_REF	GDA	REF	E	0	0	0	1	0	0	0	0	1	0	0	1	0	0	0	1	0	0	0	0	0	1	0	0	0	0	1	0	1	0	1	1	0	0	1	0	1	0	0	0	0	1	1	0	0
GDA_Ref_08	GDA_REF	GDA	REF	H	1	1	0	1	0	0	0	0	0	0	0	1	0	0	0	1	0	0	1	0	0	0	0	0	0	0	1	1	0	0	1	1	0	1	0	0	0	0	0	1	0	1	0	0	0
GDA_Ref_09	GDA_REF	GDA	REF	H	1	0	1	1	0	0	1	0	1	1	1	1	0	0	0	1	0	1	1	0	0	1	0	0	1	0	1	0	0	0	1	0	1	1	0	0	1	1	0	0	0	1	0	0	0
GDA_Ref_10	GDA_REF	GDA	REF	H	1	1	0	1	1	0	0	0	1	1	0	0	0	0	0	0	0	1	0	0	0	1	0	0	1	0	1	0	0	1	1	1	0	0	0	0	0	0	0	0	1	1	0	0	0
GDA_Ref_11	GDA_REF	GDA	REF	E	0	0	1	1	0	1	0	0	0	1	1	0	0	0	0	1	1	0	0	0	0	0	0	0	1	1	1	0	1	0	0	0	0	1	1	0	0	1	0	0	0	1	0	1	0
GDA_Ref_12	GDA_REF	GDA	REF	H	1	0	0	0	0	0	0	0	0	0	0	1	0	0	1	1	1	0	0	0	0	0	0	1	0	0	1	0	0	1	1	0	1	1	1	0	0	0	0	0	0	1	0	0	0
GDA_Ref_13	GDA_REF	GDA	REF	E	0	0	1	1	0	1	0	0	0	0	1	1	0	0	0	1	0	1	0	0	0	0	0	1	0	0	1	0	0	1	1	0	0	1	0	0	0	0	0	0	1	1	1	0	0
GDA_Ref_14	GDA_REF	GDA	REF	H	1	0	0	1	0	1	0	1	1	0	0	1	0	0	0	1	1	0	0	0	0	1	0	1	0	0	1	1	1	0	1	1	1	1	0	0	0	0	0	0	0	1	1	0	0
GDA_Ref_15	GDA_REF	GDA	REF	T	2	0	1	0	0	0	0	0	1	0	0	0	0	0	0	0	0	0	0	0	1	1	0	1	0	0	1	0	0	0	1	1	0	1	0	0	1	0	1	0	1	0	0	0	0
GDA_Ref_16	GDA_REF	GDA	REF	E	0	0	0	1	0	0	1	0	1	0	0	0	0	0	0	1	0	0	1	0	1	1	0	1	0	0	1	0	0	0	1	1	1	1	1	1	0	0	0	1	1	1	0	0	0
GDA_Ref_17	GDA_REF	GDA	REF	H	1	0	1	0	0	0	0	1	1	0	0	0	0	0	1	1	0	0	1	0	0	0	0	0	1	0	1	1	0	0	1	1	1	1	1	0	0	1	0	0	0	0	1	0	0
GDA_Ref_18	GDA_REF	GDA	REF	H	1	1	0	0	0	0	0	0	0	0	0	1	0	0	0	1	0	0	0	0	0	0	0	0	0	0	1	0	0	0	1	1	0	0	0	0	0	0	0	0	1	1	0	0	0
GDA_Ref_19	GDA_REF	GDA	REF	E	0	0	1	1	0	0	1	0	0	0	1	0	0	0	0	1	0	0	0	0	1	1	0	0	1	1	1	0	0	0	1	1	0	0	0	0	0	0	0	0	0	1	0	0	0
GDA_Ref_20	GDA_REF	GDA	REF	T	2	0	0	1	0	1	0	0	0	1	0	1	0	1	0	1	0	0	0	0	1	1	1	1	0	0	0	0	0	0	1	1	0	1	0	0	0	0	0	0	0	1	1	0	0
GDA_Ref_21	GDA_REF	GDA	REF	H	1	0	1	1	0	1	0	1	1	1	0	0	1	0	0	1	1	0	0	0	0	1	1	1	1	1	1	0	0	0	1	1	0	1	0	0	0	0	0	0	0	0	1	1	0
GDA_Ref_22	GDA_REF	GDA	REF	E	0	0	1	1	0	0	1	1	0	1	0	1	0	0	1	0	0	0	0	0	0	0	0	0	0	0	1	0	0	0	1	1	1	1	0	0	0	0	0	0	1	1	0	0	0
GDA_Ref_23	GDA_REF	GDA	REF	E	0	0	0	1	0	1	0	1	0	0	0	1	0	0	0	0	0	0	0	0	0	0	0	1	1	0	1	0	1	0	1	1	1	0	0	0	1	0	0	0	0	1	0	1	0
GDA_Ref_24	GDA_REF	GDA	REF	E	0	1	1	0	0	0	0	1	1	0	1	0	1	1	0	1	0	1	0	1	0	0	0	0	1	0	1	0	0	0	1	0	0	1	0	0	1	0	0	0	1	0	0	0	0
GDA_Ref_25	GDA_REF	GDA	REF	E	0	0	0	0	0	0	0	0	0	0	0	0	0	0	0	0	1	0	0	0	0	0	0	0	1	0	1	0	0	0	1	1	0	1	1	0	1	0	0	1	0	1	1	0	0
GDA_Ref_26	GDA_REF	GDA	REF	E	0	1	0	1	0	0	0	0	1	0	1	0	0	0	0	0	0	0	1	0	0	0	1	1	0	0	1	1	0	0	1	0	1	1	0	1	0	1	0	0	1	1	1	0	0
GDA_Ref_27	GDA_REF	GDA	REF	H	1	0	0	0	0	0	1	0	1	0	0	1	0	0	0	1	1	0	0	0	0	0	0	0	0	0	1	1	0	0	1	0	1	1	0	0	1	1	0	0	0	0	1	0	0
GDA_Ref_28	GDA_REF	GDA	REF	H	1	0	0	0	0	0	0	0	0	0	0	0	0	0	0	1	0	0	0	0	0	0	0	0	0	0	1	0	0	0	0	1	0	1	0	0	0	0	0	0	0	1	0	0	0
GDA_Ref_29	GDA_REF	GDA	REF	E	0	0	0	1	0	0	0	0	0	0	0	1	0	0	0	1	0	0	1	0	0	1	0	1	0	0	1	1	0	0	1	1	0	1	0	0	1	0	0	0	0	1	0	0	0
GDA_Ref_30	GDA_REF	GDA	REF	H	1	0	0	0	0	1	0	0	0	0	0	0	0	0	0	1	1	0	0	0	0	0	0	0	0	0	1	0	0	0	0	1	0	1	0	0	0	0	0	0	1	1	0	0	0
KRI_Har_02	KRI_HAR	KRI	HAR	E	0	1	1	1	0	0	1	0	1	0	1	1	0	1	0	1	0	0	0	0	0	1	1	0	1	1	0	0	0	0	0	1	1	1	1	1	0	0	0	0	0	1	1	0	0
KRI_Har_03	KRI_HAR	KRI	HAR	E	0	1	0	1	0	1	1	0	1	1	1	1	0	1	0	1	0	0	1	0	0	1	0	1	0	1	1	0	0	0	1	1	0	1	1	0	1	1	0	0	0	1	1	0	1
KRI_Har_04	KRI_HAR	KRI	HAR	E	0	0	1	1	0	1	0	0	1	1	0	1	0	1	0	1	1	1	1	0	0	0	0	0	1	1	0	1	0	0	1	1	0	1	0	1	1	1	0	1	0	0	1	0	1
KRI_Har_06	KRI_HAR	KRI	HAR	E	0	1	1	1	0	1	1	0	1	1	1	1	0	1	0	1	0	1	0	1	0	1	0	0	1	1	1	1	0	1	1	1	0	1	1	0	1	1	0	0	0	0	1	0	1
KRI_Har_07	KRI_HAR	KRI	HAR	E	0	0	0	1	0	0	0	0	0	1	0	1	0	0	0	0	0	0	0	0	1	0	1	0	0	0	0	0	0	0	0	0	0	0	0	0	0	0	0	0	0	0	0	0	0
KRI_Har_08	KRI_HAR	KRI	HAR	H	1	0	1	1	0	1	1	0	1	1	0	0	0	1	0	1	0	0	1	0	1	0	0	0	1	0	0	0	0	0	0	1	1	0	0	0	1	1	0	0	0	0	0	0	0
KRI_Har_09	KRI_HAR	KRI	HAR	E	0	0	0	1	0	0	0	0	1	0	0	1	0	1	0	1	0	0	0	0	1	0	0	0	1	0	0	0	0	0	0	0	0	0	0	0	0	0	0	0	0	0	0	0	0
KRI_Har_10	KRI_HAR	KRI	HAR	E	0	0	0	1	0	0	0	1	1	0	0	1	0	0	0	0	0	0	0	0	0	0	0	0	0	0	0	0	0	0	0	0	0	0	0	0	0	0	0	0	0	0	0	0	0
KRI_Har_11	KRI_HAR	KRI	HAR	E	0	0	1	1	0	0	0	1	1	0	0	0	1	0	0	1	1	0	0	0	1	1	0	1	0	0	0	0	0	0	0	0	0	0	1	0	1	0	0	0	0	1	0	0	1
KRI_Har_13	KRI_HAR	KRI	HAR	E	0	1	1	1	0	0	1	1	0	1	0	1	0	0	0	1	0	0	0	0	1	0	1	0	0	0	0	0	0	0	1	0	0	0	0	0	1	0	0	1	0	0	0	1	1
KRI_Har_14	KRI_HAR	KRI	HAR	E	0	1	0	1	0	1	0	1	0	1	0	1	0	1	0	1	0	0	1	0	0	1	1	0	1	1	0	1	0	0	1	1	0	1	0	1	1	0	0	0	0	0	0	1	0
KRI_Har_15	KRI_HAR	KRI	HAR	E	0	1	1	1	0	0	0	1	0	1	0	0	0	0	0	1	0	0	0	0	1	0	0	0	0	0	0	0	0	1	0	0	0	0	0	0	1	1	0	0	0	1	0	0	1
KRI_Har_16	KRI_HAR	KRI	HAR	E	0	0	0	1	0	1	0	0	1	1	0	0	0	0	0	1	0	0	0	0	0	0	0	1	0	0	0	0	0	0	1	0	1	0	1	0	1	1	1	0	1	0	0	0	0
KRI_Har_17	KRI_HAR	KRI	HAR	E	0	1	0	1	0	0	0	1	0	0	1	1	0	0	0	1	0	0	0	0	0	1	0	0	0	0	0	1	1	0	1	0	0	0	0	0	0	1	0	0	0	0	1	0	0
KRI_Har_18	KRI_HAR	KRI	HAR	E	0	1	1	1	0	0	0	0	1	0	0	1	0	0	0	1	0	0	0	0	1	0	0	0	0	0	0	0	0	0	1	0	0	0	0	0	0	0	0	0	0	0	0	0	0
KRI_Har_19	KRI_HAR	KRI	HAR	E	0	0	0	1	0	0	0	0	0	1	0	0	0	0	0	1	0	0	0	0	0	0	0	0	0	1	0	0	0	0	1	0	0	0	1	0	0	0	0	0	0	0	0	0	0
KRI_Har_20	KRI_HAR	KRI	HAR	E	0	0	1	1	0	1	1	0	1	1	0	1	0	0	1	1	1	1	0	1	1	0	1	0	1	0	0	0	0	0	1	1	1	1	0	0	1	0	0	0	0	1	0	1	0
KRI_Har_21	KRI_HAR	KRI	HAR	E	0	0	1	1	0	0	0	0	0	0	1	0	0	0	0	1	0	0	0	0	0	0	0	0	0	0	0	0	0	0	0	1	1	0	0	0	0	0	0	0	0	0	0	0	0
KRI_Har_22	KRI_HAR	KRI	HAR	E	0	1	0	1	0	0	0	0	0	0	0	0	0	0	0	1	0	0	0	0	0	0	0	0	0	0	0	0	0	0	0	0	0	0	0	1	0	0	0	0	0	0	0	0	0
KRI_Har_23	KRI_HAR	KRI	HAR	E	0	0	0	0	0	0	0	0	0	0	0	0	0	0	0	1	0	0	0	0	0	1	1	0	0	0	0	0	0	0	0	0	0	0	0	0	1	0	0	0	0	0	0	0	0
KRI_Har_24	KRI_HAR	KRI	HAR	E	0	1	0	1	0	0	0	0	1	1	0	1	0	0	0	1	0	1	1	0	0	0	0	0	0	1	0	0	0	1	0	0	1	1	0	0	1	1	0	0	1	0	0	0	1
KRI_Har_25	KRI_HAR	KRI	HAR	E	0	0	0	0	0	0	0	0	0	0	0	0	0	0	0	1	0	0	0	0	0	0	0	0	0	0	0	0	0	0	1	0	0	0	0	1	0	0	0	0	1	0	0	0	0
KRI_Har_26	KRI_HAR	KRI	HAR	E	0	0	0	0	0	0	0	0	0	0	0	1	0	0	0	1	1	0	0	0	0	0	0	0	0	0	0	0	0	0	0	0	0	0	0	1	0	0	0	0	0	0	0	0	0
KRI_Har_27	KRI_HAR	KRI	HAR	E	0	1	0	0	0	0	0	0	0	0	0	0	0	1	0	1	0	0	0	0	0	0	0	0	0	0	0	0	0	0	1	0	0	0	0	0	0	0	0	0	0	0	0	0	0
KRI_Har_28	KRI_HAR	KRI	HAR	NA	NA	0	0	0	0	0	1	1	0	0	0	0	0	0	0	1	0	0	0	0	0	0	0	0	0	0	0	0	0	1	1	0	1	0	0	1	0	1	0	1	0	0	0	0	0
KRI_Har_29	KRI_HAR	KRI	HAR	E	0	0	0	0	0	0	0	0	1	0	0	0	0	0	0	1	0	0	0	0	0	0	0	0	1	0	0	0	0	0	0	0	0	0	0	1	0	0	0	0	1	1	0	0	0
KRI_Har_30	KRI_HAR	KRI	HAR	E	0	0	0	0	0	0	0	0	0	0	0	0	1	1	0	1	0	0	0	0	0	0	0	0	0	0	0	0	0	0	0	0	0	0	0	0	0	0	0	0	0	0	0	0	0
KRI_Ref_01	KRI_REF	KRI	REF	NA	NA	1	0	1	0	0	1	0	1	1	1	1	0	0	0	1	0	1	1	0	1	1	0	0	1	1	1	0	0	0	1	1	0	1	1	0	1	0	0	0	1	0	1	0	1
KRI_Ref_02	KRI_REF	KRI	REF	E	0	1	1	1	0	1	0	1	0	0	0	1	0	0	0	1	0	0	1	1	0	1	0	1	1	0	0	0	0	1	0	0	1	1	0	0	1	1	0	0	1	0	1	0	0
KRI_Ref_03	KRI_REF	KRI	REF	E	0	1	1	1	0	0	1	0	0	0	0	0	0	1	0	1	0	1	0	1	0	1	1	0	1	1	0	0	0	0	0	1	0	0	0	0	1	0	0	0	0	0	1	0	0
KRI_Ref_05	KRI_REF	KRI	REF	E	0	1	1	1	0	0	0	1	1	1	0	1	0	0	0	1	0	1	1	0	0	1	0	0	1	0	1	1	0	0	1	0	0	1	0	1	0	1	0	0	0	1	0	0	0
KRI_Ref_06	KRI_REF	KRI	REF	E	0	0	0	1	0	0	0	1	0	1	0	1	0	1	0	1	0	0	0	0	0	0	0	0	0	0	0	0	0	0	0	0	0	0	0	1	0	0	0	1	1	0	0	0	1
KRI_Ref_07	KRI_REF	KRI	REF	E	0	1	0	1	0	0	1	0	1	1	1	1	0	1	0	0	0	1	1	0	1	1	0	0	1	1	1	1	0	0	1	1	0	1	1	0	1	1	0	1	0	0	1	0	1
KRI_Ref_08	KRI_REF	KRI	REF	E	0	0	0	1	0	0	1	0	1	1	0	0	0	1	0	1	0	0	0	0	0	1	0	0	1	1	0	0	0	0	0	1	1	1	0	0	0	1	0	0	0	0	0	0	0
KRI_Ref_09	KRI_REF	KRI	REF	NA	NA	1	0	1	0	1	0	1	0	1	0	0	0	0	1	1	1	1	0	0	1	0	0	1	1	0	1	0	0	0	1	1	0	1	1	1	1	0	0	0	0	0	0	1	0
KRI_Ref_11	KRI_REF	KRI	REF	E	0	0	0	1	0	0	0	0	1	0	0	0	0	0	0	1	0	0	1	0	0	0	0	0	0	1	0	0	0	1	0	1	0	0	0	0	1	0	0	1	0	0	0	0	1
KRI_Ref_12	KRI_REF	KRI	REF	E	0	0	0	1	1	0	0	0	1	0	0	0	0	0	0	1	0	0	0	0	0	0	1	1	0	0	1	0	1	0	1	0	0	1	0	1	0	0	0	1	0	0	0	0	0
KRI_Ref_13	KRI_REF	KRI	REF	NA	NA	0	1	1	0	1	1	0	1	1	1	1	1	1	0	1	0	0	1	0	0	1	0	1	1	0	0	0	0	0	0	1	0	0	0	0	0	0	0	0	0	0	0	0	0
KRI_Ref_14	KRI_REF	KRI	REF	E	0	0	1	1	0	0	0	0	1	0	0	1	1	0	0	0	0	0	0	0	0	1	0	0	0	0	0	1	0	0	0	0	0	1	0	1	0	0	0	0	0	0	0	0	0
KRI_Ref_15	KRI_REF	KRI	REF	E	0	1	0	1	0	1	1	1	0	1	0	1	0	1	0	1	0	1	1	0	1	1	1	1	0	1	1	0	0	0	1	1	0	1	0	0	1	0	0	1	0	1	0	0	0
KRI_Ref_16	KRI_REF	KRI	REF	NA	NA	1	0	1	0	0	0	0	1	1	0	1	0	0	0	1	0	0	1	0	0	0	0	0	1	0	1	1	0	0	0	1	0	0	0	0	1	0	0	0	0	1	0	1	0
KRI_Ref_17	KRI_REF	KRI	REF	E	0	1	1	1	0	1	1	0	0	0	0	0	0	0	1	0	0	0	0	0	1	0	0	1	0	0	0	0	0	0	1	1	0	0	0	0	0	0	0	0	0	0	0	0	0
KRI_Ref_18	KRI_REF	KRI	REF	E	0	1	0	1	0	0	0	0	1	1	0	1	0	0	0	1	0	0	0	0	0	0	0	0	1	1	0	0	1	0	0	0	0	0	1	0	0	0	0	0	0	0	0	0	1
KRI_Ref_19	KRI_REF	KRI	REF	E	0	1	1	1	0	0	0	0	1	0	0	0	0	1	0	1	1	0	0	0	0	0	1	0	0	1	0	1	0	0	1	0	0	1	0	1	1	0	0	0	0	0	0	0	1
KRI_Ref_20	KRI_REF	KRI	REF	H	1	0	1	1	0	1	0	1	1	0	0	0	0	0	0	1	0	0	0	0	0	0	1	0	1	0	0	0	0	0	0	0	0	1	0	0	0	1	0	0	1	1	0	0	0
KRI_Ref_21	KRI_REF	KRI	REF	E	0	0	1	0	0	0	0	1	1	0	0	0	1	1	0	1	1	0	0	1	1	1	0	0	0	1	0	1	0	0	1	0	0	0	1	1	1	1	0	0	0	0	0	0	0
KRI_Ref_22	KRI_REF	KRI	REF	E	0	0	0	1	0	1	1	0	0	1	0	0	0	0	0	1	1	0	1	0	1	0	1	1	1	0	0	1	0	0	1	1	1	1	0	1	1	1	0	0	0	0	0	0	1
KRI_Ref_23	KRI_REF	KRI	REF	E	0	0	1	1	0	1	0	0	1	1	0	1	0	0	0	1	0	0	0	0	0	1	1	0	0	0	0	1	0	0	1	1	0	1	0	1	0	1	1	0	0	1	0	0	0
KRI_Ref_24	KRI_REF	KRI	REF	E	0	0	1	0	0	1	1	0	1	1	0	0	0	0	0	1	0	0	1	0	0	0	0	0	0	1	0	1	0	0	1	1	0	1	0	1	1	1	1	0	0	0	1	0	0
KRI_Ref_25	KRI_REF	KRI	REF	E	0	0	0	1	0	1	0	1	1	1	0	1	0	0	0	1	0	0	0	0	0	1	0	0	0	0	0	1	0	0	1	1	0	1	0	1	1	1	0	1	0	0	1	1	1
KRI_Ref_26	KRI_REF	KRI	REF	NA	NA	1	0	1	0	0	0	0	0	0	0	0	0	0	0	0	0	0	0	0	0	0	0	0	0	0	1	1	0	0	0	0	0	1	1	0	0	0	0	0	0	0	0	0	0
KRI_Ref_27	KRI_REF	KRI	REF	E	0	0	0	0	0	0	0	0	0	0	0	0	0	1	0	1	0	0	0	0	0	0	0	0	0	0	0	0	0	0	0	0	0	0	0	0	0	0	0	0	0	0	0	0	0
KRI_Ref_28	KRI_REF	KRI	REF	E	0	1	0	1	0	0	0	0	0	0	0	0	0	0	0	0	0	0	0	0	0	0	0	0	0	0	1	1	0	0	1	0	1	1	0	0	0	0	0	0	0	0	0	0	0
KRI_Ref_29	KRI_REF	KRI	REF	E	0	0	1	1	0	0	1	1	1	0	0	0	0	0	0	1	0	0	0	1	0	0	0	0	0	1	0	0	1	0	1	0	1	0	1	0	1	0	1	0	0	0	0	0	0
KRI_Ref_30	KRI_REF	KRI	REF	E	0	1	0	1	0	0	1	1	0	1	0	1	0	1	0	1	0	0	1	0	1	1	0	0	0	0	1	0	0	0	1	0	1	1	0	0	0	1	0	1	0	0	0	0	0
[truncated: 310 more columns]

## Sheet: HAR_REF_BP
SAMPLE	SITE	LOCATION	POLLUTION_TYPE	SPECIES	TROSSULUS	PrimH_1	PrimH_2	PrimH_3	PrimH_4	PrimH_5	PrimH_6	PrimH_7	PrimH_8	PrimH_9	PrimH_10	PrimH_13	PrimH_14	PrimH_18	PrimH_19	PrimH_21	PrimH_22	PrimH_23	PrimH_24	PrimH_25	PrimH_26	PrimH_27	PrimH_28	PrimH_29	PrimH_30	PrimH_31	PrimH_33	PrimH_35	PrimH_37	PrimH_38	PrimH_39	PrimH_40	PrimH_41	PrimH_42	PrimH_43	PrimH_44	PrimH_45	PrimH_46	PrimH_48	PrimH_49	PrimH_50	PrimH_51	PrimH_52	PrimH_54	PrimH_55
Ask_Har_01	ASK_HAR	ASK	HAR	H	1	0	0	0	0	0	0	0	0	0	0	0	1	0	0	1	0	0	1	0	1	0	0	1	0	0	1	0	0	0	1	0	0	1	1	0	0	0	1	0	1	1	0	1	0
Ask_Har_02	ASK_HAR	ASK	HAR	H	1	0	1	0	0	1	1	0	0	0	0	1	0	0	0	1	0	0	1	0	0	0	0	1	0	0	1	0	0	0	1	1	0	1	0	0	0	0	0	0	0	1	1	0	0
Ask_Har_03	ASK_HAR	ASK	HAR	E	0	0	0	0	0	0	0	0	0	1	0	1	0	0	0	0	0	0	0	0	0	1	0	0	1	0	1	0	0	0	1	1	0	1	0	0	0	0	0	0	1	1	0	0	0
Ask_Har_04	ASK_HAR	ASK	HAR	E	0	0	0	0	0	1	0	0	1	1	0	1	0	0	0	0	0	0	1	0	0	0	0	0	1	0	1	0	0	0	1	1	0	1	0	0	0	0	0	0	0	0	1	0	0
Ask_Har_05	ASK_HAR	ASK	HAR	E	0	0	0	1	0	1	0	0	1	0	0	1	0	0	0	1	0	0	1	0	0	1	0	1	0	0	1	0	0	0	1	1	0	1	0	0	0	0	0	0	1	1	0	1	0
Ask_Har_06	ASK_HAR	ASK	HAR	E	0	1	0	1	0	0	1	0	0	0	0	1	1	0	0	1	0	0	0	0	0	1	0	0	0	0	1	0	1	0	1	0	0	1	0	0	0	0	0	0	0	0	1	0	0
Ask_Har_07	ASK_HAR	ASK	HAR	H	1	0	0	0	0	0	0	0	0	0	0	1	0	0	0	0	0	0	0	0	0	1	0	1	0	0	1	1	0	1	1	1	0	1	0	0	1	0	0	1	0	0	0	1	1
Ask_Har_08	ASK_HAR	ASK	HAR	E	0	1	0	1	0	0	0	0	0	0	0	1	1	0	0	0	0	0	0	0	0	0	0	1	1	0	1	0	0	1	1	0	0	1	0	1	0	0	0	0	1	0	1	1	0
Ask_Har_09	ASK_HAR	ASK	HAR	E	0	0	0	0	0	1	1	0	0	0	0	0	0	0	0	1	0	0	1	0	0	0	0	1	0	0	0	0	0	1	0	0	0	0	0	0	0	1	0	0	0	0	0	0	0
Ask_Har_10	ASK_HAR	ASK	HAR	E	0	1	0	0	0	0	0	0	0	0	0	0	0	0	0	0	0	0	0	0	0	0	0	0	0	0	0	0	0	0	0	0	0	0	0	0	0	0	1	0	1	1	0	0	0
Ask_Har_11	ASK_HAR	ASK	HAR	E	0	1	0	1	0	1	1	0	0	1	0	1	0	0	0	1	1	0	1	0	1	1	0	1	0	0	1	1	0	0	1	0	0	1	1	0	0	1	0	0	0	1	1	0	0
Ask_Har_12	ASK_HAR	ASK	HAR	E	0	1	0	1	0	0	0	1	0	0	1	1	0	0	0	1	0	0	1	0	1	1	0	1	0	0	1	0	0	0	1	0	1	1	0	0	0	1	0	0	1	1	0	1	0
Ask_Har_13	ASK_HAR	ASK	HAR	E	0	0	0	0	0	0	0	0	0	0	0	1	0	0	0	1	0	0	0	0	0	1	0	1	0	1	1	0	0	0	1	1	0	1	0	0	0	0	0	1	0	0	0	0	0
Ask_Har_14	ASK_HAR	ASK	HAR	H	1	0	0	0	0	0	1	0	0	1	1	0	0	0	0	1	0	0	0	0	1	1	0	0	1	0	1	1	0	0	1	1	0	1	0	0	0	0	0	0	0	0	0	0	0
Ask_Har_15	ASK_HAR	ASK	HAR	H	1	0	0	0	0	0	0	1	0	0	0	1	0	0	0	1	0	0	0	0	0	0	0	1	0	0	1	0	0	0	1	1	0	1	0	0	0	1	0	1	0	0	1	1	0
Ask_Har_16	ASK_HAR	ASK	HAR	E	0	1	0	1	0	0	1	0	0	0	0	1	0	0	0	1	0	0	1	0	0	1	0	1	0	0	1	1	0	0	1	1	0	1	0	0	0	0	1	0	1	0	0	1	0
Ask_Har_17	ASK_HAR	ASK	HAR	H	1	0	0	0	0	0	0	1	1	0	0	1	0	0	0	1	0	0	0	0	0	1	0	1	0	0	1	0	0	0	1	1	0	1	1	0	0	1	0	1	1	0	0	0	0
Ask_Har_18	ASK_HAR	ASK	HAR	H	1	0	1	1	0	0	1	1	1	1	0	1	1	1	0	1	0	0	1	0	0	1	0	0	1	0	1	1	0	0	1	1	0	0	0	0	0	1	0	1	0	0	0	0	0
Ask_Har_19	ASK_HAR	ASK	HAR	E	0	0	1	1	0	0	0	1	0	1	0	1	0	0	0	0	0	0	1	0	0	0	0	1	0	0	1	1	1	0	1	1	0	1	1	0	0	1	0	1	0	0	1	0	0
Ask_Har_20	ASK_HAR	ASK	HAR	E	0	0	0	1	0	1	1	0	0	0	1	0	1	0	1	1	0	0	0	0	1	1	0	1	0	0	1	0	0	0	1	0	0	1	1	0	0	0	0	0	1	1	0	1	0
Ask_Har_21	ASK_HAR	ASK	HAR	H	1	1	0	1	0	0	0	0	0	0	0	1	0	0	0	0	0	0	0	0	0	0	0	1	0	0	1	0	0	0	0	1	0	1	0	0	0	0	0	0	1	0	0	1	0
Ask_Har_22	ASK_HAR	ASK	HAR	H	1	0	1	1	0	1	1	0	1	0	0	0	1	1	0	1	0	0	1	0	0	1	0	0	1	0	1	1	0	0	1	0	0	1	0	0	0	1	0	0	1	0	0	0	1
Ask_Har_23	ASK_HAR	ASK	HAR	H	1	0	1	1	0	0	1	0	0	0	0	0	0	1	0	0	0	0	0	0	0	0	0	1	0	0	1	0	0	0	1	1	0	1	0	0	1	0	1	1	0	0	0	0	0
Ask_Har_24	ASK_HAR	ASK	HAR	H	1	0	0	1	0	0	1	0	1	1	0	1	0	0	0	1	0	0	1	0	1	1	0	1	0	0	1	0	0	0	0	1	0	1	0	0	0	0	0	1	0	1	0	0	0
Ask_Har_25	ASK_HAR	ASK	HAR	T	2	1	1	0	0	1	1	1	1	0	0	0	0	1	0	1	1	1	0	0	1	1	1	1	1	0	1	0	1	0	1	1	0	1	0	1	0	0	0	0	1	1	1	0	0
Ask_Har_26	ASK_HAR	ASK	HAR	E	0	1	1	0	0	0	1	1	1	1	0	1	0	0	0	1	0	1	1	0	1	1	0	1	1	0	1	1	1	0	1	1	0	1	1	1	1	0	0	1	0	1	0	1	1
Ask_Har_27	ASK_HAR	ASK	HAR	T	2	0	0	1	0	1	0	0	0	0	0	1	0	0	0	1	0	0	0	0	0	1	0	0	0	0	1	0	0	1	0	0	0	1	0	1	1	0	0	1	0	0	0	0	1
Ask_Har_28	ASK_HAR	ASK	HAR	E	0	0	1	0	0	0	1	0	0	0	0	0	0	0	0	0	0	0	0	0	0	0	0	0	0	0	1	0	0	0	1	1	0	1	0	0	0	0	0	0	0	1	0	0	1
Ask_Har_29	ASK_HAR	ASK	HAR	H	1	0	0	0	0	0	0	0	0	0	0	0	0	0	0	1	1	0	0	0	0	0	0	0	0	0	1	0	0	0	1	1	0	1	0	1	0	0	0	0	1	1	1	0	0
Ask_Har_30	ASK_HAR	ASK	HAR	E	0	0	0	0	0	0	0	0	1	1	0	0	0	0	0	0	0	0	0	0	0	0	0	1	0	0	1	0	0	0	1	1	0	0	0	0	1	0	0	0	0	1	0	0	0
Ask_Ref_01	ASK_REF	ASK	REF	H	1	1	0	0	0	1	0	1	0	1	0	0	0	0	0	0	1	0	0	0	1	1	0	1	1	0	1	1	0	0	1	0	1	1	0	1	1	0	0	0	0	0	0	0	0
Ask_Ref_02	ASK_REF	ASK	REF	E	0	1	1	1	0	1	0	0	1	1	0	1	1	0	0	0	0	0	1	0	1	1	0	1	1	0	1	0	0	0	1	0	0	1	1	0	1	0	0	1	1	0	0	0	0
Ask_Ref_03	ASK_REF	ASK	REF	H	1	1	1	1	0	0	0	1	1	0	0	0	0	1	1	1	0	0	0	0	0	1	0	0	1	0	1	0	0	0	1	1	0	0	0	0	0	0	0	1	1	0	0	1	0
Ask_Ref_04	ASK_REF	ASK	REF	H	1	1	0	1	0	1	1	0	0	1	0	1	0	0	0	0	0	0	0	0	1	0	0	1	1	0	1	1	0	0	1	1	0	0	0	0	0	1	0	0	0	1	0	0	1
Ask_Ref_06	ASK_REF	ASK	REF	E	0	0	0	0	0	0	0	0	1	1	0	0	0	1	0	1	0	0	0	0	0	0	0	0	0	0	1	0	0	0	1	1	0	1	0	0	0	0	0	0	0	1	0	0	0
Ask_Ref_07	ASK_REF	ASK	REF	T	2	1	0	0	0	0	0	0	0	0	0	0	0	0	0	0	0	0	0	0	0	1	0	1	1	0	0	0	0	0	0	1	0	1	1	0	1	1	0	1	0	0	0	0	0
Ask_Ref_08	ASK_REF	ASK	REF	E	0	0	0	1	0	1	0	0	0	0	0	0	0	1	0	0	0	0	1	0	1	0	0	1	0	0	1	0	1	0	1	0	0	1	0	0	1	0	0	0	0	0	0	0	0
Ask_Ref_10	ASK_REF	ASK	REF	H	1	0	0	0	0	0	0	0	1	1	1	1	0	0	0	0	1	0	1	0	0	1	0	1	0	0	1	0	0	0	1	1	1	1	0	0	1	0	0	0	0	1	1	1	0
Ask_Ref_11	ASK_REF	ASK	REF	E	0	1	1	0	0	1	0	0	0	1	0	1	0	1	0	1	1	0	0	0	0	1	0	1	0	0	1	0	0	0	1	1	0	1	0	0	0	1	0	1	0	0	0	0	0
Ask_Ref_12	ASK_REF	ASK	REF	T	2	0	0	0	0	0	0	0	0	1	1	0	1	0	0	0	0	0	0	0	0	0	1	1	0	0	1	0	0	0	1	1	0	1	0	0	0	0	0	0	0	1	0	0	0
Ask_Ref_13	ASK_REF	ASK	REF	E	0	1	0	0	0	0	0	0	0	0	0	1	0	0	0	0	1	0	0	0	0	0	0	1	0	0	1	0	0	0	1	1	0	0	0	1	0	0	0	0	1	0	0	0	0
Ask_Ref_14	ASK_REF	ASK	REF	T	2	0	0	1	1	0	0	0	1	0	0	1	0	0	0	1	1	0	0	0	0	1	0	1	0	0	1	0	0	0	1	1	0	1	0	0	0	0	0	0	1	1	0	0	0
Ask_Ref_16	ASK_REF	ASK	REF	H	1	0	0	0	0	0	0	0	0	0	0	1	0	0	0	1	1	0	0	0	1	1	0	1	0	0	1	1	0	0	0	1	1	1	0	0	0	0	0	0	1	0	0	1	0
Ask_Ref_17	ASK_REF	ASK	REF	H	1	0	0	1	0	0	0	0	0	0	0	0	0	0	0	1	1	0	0	0	0	1	0	1	0	0	1	0	0	0	1	1	0	1	0	0	1	0	0	1	1	1	0	1	0
Ask_Ref_18	ASK_REF	ASK	REF	H	1	1	0	1	0	0	1	0	1	0	0	0	0	0	0	1	0	1	0	0	0	1	0	0	1	0	1	0	0	0	0	0	0	1	0	0	0	0	0	0	1	0	0	0	0
Ask_Ref_19	ASK_REF	ASK	REF	T	2	1	0	1	0	0	0	0	0	1	0	0	0	0	0	1	0	1	1	0	1	1	1	0	0	0	1	1	0	0	1	1	1	1	0	0	0	1	0	1	0	1	0	1	0
Ask_Ref_22	ASK_REF	ASK	REF	H	1	0	1	1	0	1	1	1	0	0	0	0	0	0	0	1	0	0	0	0	0	1	0	1	0	0	1	1	0	0	1	1	0	1	0	0	0	0	0	1	0	1	1	1	1
Ask_Ref_23	ASK_REF	ASK	REF	H	1	0	0	1	0	0	0	1	0	0	0	1	0	0	0	0	0	0	0	0	0	0	0	0	1	0	1	0	0	0	1	0	0	1	0	0	0	0	0	0	1	0	0	0	0
Ask_Ref_24	ASK_REF	ASK	REF	H	1	0	0	0	0	0	0	0	0	0	0	1	0	1	0	1	0	0	0	0	0	1	0	0	0	0	1	0	0	0	1	1	0	1	0	0	0	0	0	1	0	1	0	1	0
Ask_Ref_25	ASK_REF	ASK	REF	T	2	0	0	0	0	0	0	0	1	0	0	1	0	0	0	1	0	0	0	0	0	0	0	0	0	0	1	0	0	0	1	1	0	1	0	0	0	0	0	0	0	1	0	1	0
Ask_Ref_26	ASK_REF	ASK	REF	H	1	1	0	1	0	0	1	1	0	0	0	1	0	0	0	1	0	0	0	1	1	1	0	1	0	0	1	0	0	0	1	1	0	1	0	0	0	0	0	0	1	0	0	0	0
Ask_Ref_27	ASK_REF	ASK	REF	H	1	1	1	1	0	1	0	0	1	0	0	1	0	0	0	1	0	0	0	0	0	1	0	0	0	0	1	0	0	1	1	1	0	0	0	0	0	0	0	0	0	0	0	0	0
Ask_Ref_28	ASK_REF	ASK	REF	H	1	1	0	1	0	1	1	0	1	0	0	1	0	0	0	1	1	0	0	0	1	0	0	1	0	0	1	0	0	0	1	1	0	1	0	0	0	0	0	0	1	1	1	0	0
Ask_Ref_29	ASK_REF	ASK	REF	E	0	1	0	1	0	1	1	0	0	0	0	1	0	0	1	1	0	0	0	0	1	1	0	1	1	0	1	0	0	0	1	0	0	1	0	0	0	0	0	0	1	0	0	1	0
Ask_Ref_30	ASK_REF	ASK	REF	H	1	1	0	0	0	0	0	0	0	0	0	0	0	1	1	0	0	0	0	0	0	0	0	1	0	0	1	0	0	0	1	1	0	0	0	0	0	0	0	1	0	1	0	0	1
TVA_Har_01	TVA_HAR	TVA	HAR	H	1	1	0	0	0	0	1	1	0	1	0	0	0	0	0	1	0	0	1	0	0	1	0	0	0	0	1	0	0	0	1	0	1	1	0	0	0	0	0	0	0	1	1	1	0
TVA_Har_04	TVA_HAR	TVA	HAR	E	0	1	1	0	1	0	1	1	0	0	0	0	0	0	1	0	0	0	1	0	1	1	1	0	1	0	1	0	1	0	0	0	1	1	1	0	0	0	0	0	0	1	0	1	0
TVA_Har_06	TVA_HAR	TVA	HAR	H	1	0	0	1	0	0	1	0	1	0	0	1	0	0	0	1	0	0	0	0	0	0	0	1	0	0	1	0	0	0	1	1	1	0	0	0	0	0	0	0	1	1	1	0	0
TVA_Har_07	TVA_HAR	TVA	HAR	T	2	1	0	1	1	1	1	0	1	1	0	0	0	0	0	1	0	0	0	1	0	1	0	0	1	1	1	1	0	0	1	1	0	1	0	0	0	1	0	1	0	1	1	0	1
TVA_Har_08	TVA_HAR	TVA	HAR	NA	NA	0	0	1	0	1	1	0	1	1	0	1	0	0	0	0	1	0	0	0	0	0	0	0	0	0	1	0	0	0	1	1	0	1	0	0	0	0	0	1	0	0	0	1	0
TVA_Har_09	TVA_HAR	TVA	HAR	H	1	0	0	1	0	0	0	0	0	1	0	1	0	0	0	1	0	0	0	0	0	1	0	0	0	0	1	0	0	0	1	0	0	1	0	0	0	0	0	0	0	1	0	1	0
TVA_Har_10	TVA_HAR	TVA	HAR	E	0	1	0	1	0	1	1	1	0	0	0	1	0	0	0	1	0	1	0	1	1	0	0	0	1	0	1	0	0	0	1	0	1	1	0	0	0	1	0	1	1	1	0	1	0
TVA_Har_11	TVA_HAR	TVA	HAR	H	1	1	0	0	0	0	0	0	1	1	0	1	0	0	0	0	0	0	1	0	0	1	0	0	0	0	1	1	1	0	1	0	1	1	0	0	0	0	0	1	0	1	0	1	0
TVA_Har_12	TVA_HAR	TVA	HAR	H	1	0	0	0	0	0	0	0	1	1	0	1	0	0	0	0	0	0	0	0	0	0	0	1	0	0	1	0	0	0	1	1	0	1	0	0	0	0	0	0	1	1	0	0	0
TVA_Har_13	TVA_HAR	TVA	HAR	E	0	0	0	1	0	1	0	1	0	0	1	0	0	0	0	1	0	0	1	0	0	0	0	0	1	0	1	0	0	0	1	1	0	1	0	0	1	0	0	1	1	0	0	0	0
TVA_Har_14	TVA_HAR	TVA	HAR	E	0	0	0	0	0	1	0	0	1	0	0	1	0	0	0	1	0	0	1	0	0	0	0	1	0	0	1	0	0	0	1	1	0	0	0	0	0	0	0	0	1	1	0	0	0
TVA_Har_15	TVA_HAR	TVA	HAR	E	0	1	1	1	0	0	1	1	1	1	0	1	0	0	0	0	1	1	0	0	0	0	0	1	1	0	1	0	0	0	1	1	0	1	1	0	1	0	0	1	0	1	0	0	0
TVA_Har_16	TVA_HAR	TVA	HAR	H	1	0	1	1	0	1	0	0	0	1	1	1	0	1	0	1	0	0	1	0	0	1	0	0	1	0	1	0	1	0	1	1	0	1	0	0	0	0	0	0	0	0	0	0	0
TVA_Har_17	TVA_HAR	TVA	HAR	H	1	1	0	0	0	1	0	0	0	0	0	1	0	0	0	1	0	0	0	0	1	0	0	1	0	0	1	0	0	0	1	1	0	1	0	0	0	0	0	1	0	1	0	0	0
TVA_Har_18	TVA_HAR	TVA	HAR	H	1	0	0	1	0	0	0	0	0	0	0	1	0	0	0	1	0	0	0	0	0	1	0	0	0	0	1	0	0	0	1	1	0	1	0	0	0	0	0	0	0	1	0	1	0
TVA_Har_19	TVA_HAR	TVA	HAR	E	0	1	0	1	0	1	0	0	0	0	1	1	0	0	0	1	0	0	0	0	0	0	0	1	1	0	1	0	0	0	1	1	0	0	1	0	0	0	0	1	0	0	1	0	0
TVA_Har_20	TVA_HAR	TVA	HAR	H	1	1	1	1	0	1	0	1	0	1	0	1	0	0	0	1	1	0	0	1	0	1	0	0	1	1	1	0	1	0	1	1	0	1	1	1	0	1	0	1	0	0	0	0	0
TVA_Har_21	TVA_HAR	TVA	HAR	H	1	1	1	1	0	0	0	0	0	1	0	1	0	0	0	0	0	0	0	0	0	0	0	1	0	0	1	0	0	0	1	0	1	1	1	0	0	1	0	0	0	0	1	1	0
TVA_Har_22	TVA_HAR	TVA	HAR	H	1	1	1	0	0	0	1	1	0	0	0	0	0	1	0	1	0	1	0	0	0	0	1	0	0	0	1	0	0	0	1	1	0	1	0	0	0	0	0	1	0	1	1	0	0
TVA_Har_23	TVA_HAR	TVA	HAR	E	0	0	1	1	0	0	0	0	1	0	0	0	0	0	0	0	0	0	0	0	0	0	0	1	0	0	1	0	0	0	0	1	0	1	0	0	0	0	0	0	0	0	0	0	0
TVA_Har_25	TVA_HAR	TVA	HAR	E	0	0	1	1	0	0	1	1	0	0	0	1	0	0	0	1	0	0	0	0	0	0	0	1	1	0	1	0	0	0	1	1	0	1	0	0	0	1	0	1	1	1	1	1	0
TVA_Har_27	TVA_HAR	TVA	HAR	E	0	1	0	0	0	0	0	0	1	0	1	1	0	0	0	0	0	0	1	0	0	0	0	1	0	0	1	0	0	0	0	1	0	0	0	0	0	0	0	0	1	0	0	1	0
TVA_Har_28	TVA_HAR	TVA	HAR	H	1	1	0	1	0	0	0	0	1	0	0	1	0	0	0	1	1	0	0	0	0	1	0	0	0	1	1	0	0	0	1	1	0	1	1	0	0	0	0	1	1	1	1	1	0
TVA_Har_29	TVA_HAR	TVA	HAR	H	1	1	0	1	0	0	1	0	0	0	1	0	0	0	0	1	0	0	0	0	0	0	1	1	0	0	1	0	0	0	1	1	0	0	0	0	0	1	0	0	0	0	0	0	0
TVA_Har_30	TVA_HAR	TVA	HAR	H	1	1	0	0	0	0	0	1	0	0	0	1	0	0	0	1	1	0	1	0	0	0	0	1	0	0	1	0	0	0	1	1	0	1	0	0	0	0	0	0	0	1	1	0	0
TVA_Ref_01	TVA_REF	TVA	REF	T	2	0	0	1	1	0	0	0	0	1	0	1	0	0	0	1	1	0	0	0	0	1	0	0	1	0	1	0	0	0	1	1	0	1	0	0	0	1	0	0	1	1	0	0	0
TVA_Ref_02	TVA_REF	TVA	REF	E	0	0	1	1	0	0	0	0	0	0	0	1	0	0	0	1	0	0	0	0	0	1	0	1	0	0	1	0	0	0	1	0	0	0	0	0	0	0	0	1	0	0	0	1	0
TVA_Ref_03	TVA_REF	TVA	REF	E	0	0	0	1	0	0	0	0	1	1	0	1	0	0	0	0	1	0	1	0	0	0	0	0	0	0	1	0	0	0	1	0	0	1	0	0	1	0	0	0	1	0	0	0	0
TVA_Ref_04	TVA_REF	TVA	REF	H	1	0	0	0	0	0	0	0	1	0	0	0	0	0	0	1	1	0	0	0	0	1	0	1	0	0	1	0	0	0	1	1	0	0	0	0	1	0	0	0	0	0	0	0	0
TVA_Ref_05	TVA_REF	TVA	REF	E	0	0	0	1	0	1	0	1	0	1	0	1	0	0	0	1	0	0	0	0	0	0	0	0	1	0	1	0	0	0	1	1	0	1	0	0	0	0	0	0	1	0	0	0	0
TVA_Ref_06	TVA_REF	TVA	REF	H	1	0	0	1	0	0	1	1	0	0	0	0	0	0	0	0	0	0	0	0	0	0	0	1	0	0	1	0	1	0	1	0	0	1	0	0	0	0	0	0	0	0	0	1	0
TVA_Ref_07	TVA_REF	TVA	REF	T	2	0	0	0	0	1	1	0	0	0	1	1	0	0	0	1	0	1	0	0	0	0	0	1	0	0	1	0	0	0	1	1	0	1	0	0	1	0	0	0	0	0	1	0	0
TVA_Ref_08	TVA_REF	TVA	REF	E	0	1	0	1	0	1	0	0	0	0	0	1	0	0	0	0	0	0	0	1	0	0	0	1	0	0	1	1	0	0	1	1	0	0	0	0	0	0	0	0	0	0	0	1	0
TVA_Ref_09	TVA_REF	TVA	REF	NA	NA	1	1	1	0	0	0	0	0	1	0	0	0	0	0	1	0	0	0	0	0	0	0	1	0	0	1	0	0	0	1	0	0	1	0	0	0	0	0	0	0	0	0	0	0
TVA_Ref_10	TVA_REF	TVA	REF	H	1	0	0	0	0	0	1	0	0	0	0	0	0	0	0	1	0	0	0	0	0	1	0	1	0	0	1	1	0	0	1	1	0	1	0	0	0	0	0	0	1	1	0	0	0
TVA_Ref_11	TVA_REF	TVA	REF	E	0	0	1	0	0	0	0	0	1	0	0	1	0	0	0	0	0	0	1	0	0	1	0	1	0	0	1	0	0	0	1	1	0	1	0	0	0	0	0	0	0	1	0	0	0
TVA_Ref_12	TVA_REF	TVA	REF	H	1	0	0	0	0	1	0	1	0	0	0	1	0	0	0	1	0	0	0	0	0	1	0	0	1	0	1	0	1	0	0	1	0	1	1	0	1	1	0	0	0	0	0	0	0
TVA_Ref_13	TVA_REF	TVA	REF	E	0	1	0	1	0	1	0	1	1	0	0	1	1	1	0	1	0	0	0	1	0	1	0	0	1	1	1	0	0	0	1	1	0	1	0	0	0	0	0	0	1	1	0	1	0
TVA_Ref_14	TVA_REF	TVA	REF	H	1	1	1	1	0	0	1	0	0	0	0	1	0	1	0	0	1	1	0	0	0	1	0	0	1	0	1	1	0	0	1	1	0	1	0	0	1	1	0	1	1	1	0	1	0
TVA_Ref_15	TVA_REF	TVA	REF	H	1	1	0	0	0	0	0	0	0	0	0	0	1	0	1	1	1	0	0	0	0	0	0	1	0	0	1	0	1	0	1	0	1	1	0	0	1	0	1	0	0	1	0	0	0
TVA_Ref_16	TVA_REF	TVA	REF	E	0	1	0	1	0	0	0	0	1	1	0	1	0	0	0	0	0	0	0	0	0	1	0	1	0	0	1	1	0	0	1	1	0	1	0	0	0	0	0	1	0	1	1	0	0
TVA_Ref_17	TVA_REF	TVA	REF	T	2	1	0	1	0	1	0	0	0	0	1	0	0	0	0	1	0	0	0	1	0	1	0	1	1	0	1	0	0	0	1	1	0	0	0	0	0	0	0	0	1	1	0	0	0
TVA_Ref_18	TVA_REF	TVA	REF	H	1	1	1	1	0	0	0	1	1	1	0	0	0	0	0	1	0	0	0	0	0	0	1	1	0	0	1	0	1	0	1	1	0	0	0	0	0	0	0	0	1	1	0	1	1
TVA_Ref_20	TVA_REF	TVA	REF	H	1	0	0	1	1	1	0	0	0	0	0	0	0	1	0	1	0	0	0	0	1	1	0	0	0	0	1	0	0	0	0	1	0	0	0	0	0	0	0	0	0	0	0	0	0
TVA_Ref_21	TVA_REF	TVA	REF	T	2	0	0	0	0	1	0	1	0	0	0	1	0	0	0	1	1	0	1	0	0	1	0	1	0	0	1	0	0	0	1	1	0	1	0	0	1	1	0	1	0	0	1	1	0
TVA_Ref_22	TVA_REF	TVA	REF	H	1	1	0	1	0	0	0	0	0	0	0	0	0	0	0	0	0	0	0	0	0	0	0	0	0	0	1	0	0	0	1	1	0	0	0	0	0	0	0	0	1	1	0	0	1
TVA_Ref_23	TVA_REF	TVA	REF	T	2	0	1	1	0	0	1	0	0	0	0	1	0	1	0	1	1	0	0	0	0	1	1	1	0	0	1	0	0	0	1	1	0	1	0	0	0	0	0	0	1	1	0	1	0
TVA_Ref_24	TVA_REF	TVA	REF	T	2	0	0	0	0	0	0	0	1	0	0	1	0	0	1	1	0	0	0	0	0	0	0	1	0	0	1	1	0	0	1	1	0	1	0	0	0	0	0	0	0	1	1	0	0
TVA_Ref_25	TVA_REF	TVA	REF	H	1	0	0	1	0	0	0	0	1	0	0	1	0	0	0	1	1	0	0	0	0	0	1	1	0	0	1	0	0	1	1	1	0	1	0	0	0	0	0	1	1	0	1	0	0
TVA_Ref_26	TVA_REF	TVA	REF	H	1	0	0	1	0	0	0	0	0	0	0	1	0	0	0	1	1	0	0	1	1	1	0	1	0	0	1	0	0	0	1	1	0	1	1	0	1	1	0	1	1	1	0	0	0
TVA_Ref_29	TVA_REF	TVA	REF	H	1	1	0	0	0	0	0	0	0	1	1	1	0	0	0	0	0	0	0	0	0	1	0	0	0	0	1	1	0	0	1	1	1	1	0	0	1	1	0	1	1	0	1	0	0
TVA_Ref_30	TVA_REF	TVA	REF	E	0	0	0	0	0	0	0	0	0	0	0	1	1	0	0	1	0	0	0	0	0	1	0	0	1	0	1	0	1	0	1	1	0	1	0	0	0	1	0	0	0	1	0	0	1
Kar_Har_02	KAR_HAR	KAR	HAR	E	0	0	0	1	0	0	0	0	0	0	0	0	0	0	0	1	0	0	0	0	0	0	0	1	0	0	1	0	0	0	1	1	0	1	0	0	0	0	0	1	0	1	0	0	0
Kar_Har_03	KAR_HAR	KAR	HAR	NA	NA	0	0	0	0	0	1	1	1	1	0	0	0	0	0	1	0	0	0	0	0	0	0	0	0	0	1	0	0	0	1	1	0	0	0	0	0	0	1	0	1	1	0	0	1
Kar_Har_04	KAR_HAR	KAR	HAR	E	0	1	0	1	0	0	1	1	0	0	1	1	0	0	0	1	0	0	0	0	0	1	0	1	1	0	1	0	0	1	1	0	1	1	0	0	0	0	0	0	1	1	0	0	0
Kar_Har_10	KAR_HAR	KAR	HAR	E	0	1	0	0	0	0	0	0	0	0	0	0	0	0	0	0	0	0	0	0	0	0	0	1	0	0	1	0	0	0	0	0	0	1	0	0	0	0	0	0	0	0	1	0	0
Kar_Har_11	KAR_HAR	KAR	HAR	H	1	1	1	1	0	0	1	1	0	0	0	0	1	0	0	0	0	0	0	0	0	1	0	0	1	0	1	0	0	0	1	0	0	1	0	0	0	0	0	0	0	0	0	0	0
Kar_Har_12	KAR_HAR	KAR	HAR	T	2	1	1	1	0	0	1	0	0	0	1	0	0	1	0	1	0	0	0	0	1	1	0	1	1	0	1	0	1	0	1	1	0	1	0	0	1	0	0	0	0	0	0	1	0
Kar_Har_13	KAR_HAR	KAR	HAR	E	0	0	0	0	0	0	1	0	0	0	0	0	0	0	0	1	0	0	0	0	1	1	0	0	1	0	1	0	0	0	0	0	0	1	0	0	1	0	0	0	0	0	0	0	0
Kar_Har_14	KAR_HAR	KAR	HAR	H	1	1	1	1	0	0	1	0	1	0	1	1	1	0	1	0	0	1	0	0	0	0	0	0	1	0	1	0	1	0	1	0	0	0	1	0	1	0	0	0	0	1	0	0	0
Kar_Har_15	KAR_HAR	KAR	HAR	H	1	0	0	1	0	0	1	0	1	0	0	0	1	0	0	1	0	0	0	0	0	0	0	1	1	0	1	0	0	0	0	0	0	1	0	0	1	0	0	0	0	0	0	0	0
Kar_Har_16	KAR_HAR	KAR	HAR	E	0	1	0	0	0	0	0	0	1	1	0	1	0	0	0	1	0	0	1	0	0	1	0	0	1	0	1	1	0	0	1	1	0	1	0	0	0	0	0	1	1	1	1	0	0
Kar_Har_17	KAR_HAR	KAR	HAR	H	1	1	1	1	0	0	1	1	0	1	0	0	0	0	0	0	0	0	0	0	0	0	0	1	1	1	1	0	0	0	1	0	0	1	0	1	0	0	0	0	1	1	0	0	0
Kar_Har_18	KAR_HAR	KAR	HAR	E	0	0	1	1	0	1	0	1	1	0	0	1	0	1	0	1	0	1	0	0	1	0	0	0	1	1	1	1	1	0	1	1	1	1	1	0	1	0	0	1	0	1	1	0	1
Kar_Har_19	KAR_HAR	KAR	HAR	E	0	0	1	1	0	0	0	1	1	1	1	1	0	0	0	1	0	1	0	1	0	0	0	1	1	0	1	0	0	0	0	0	0	1	0	1	1	0	0	0	0	1	0	0	0
Kar_Har_20	KAR_HAR	KAR	HAR	H	1	0	1	1	0	1	0	0	1	0	1	1	0	0	1	1	1	0	1	0	1	1	0	1	1	0	1	0	0	0	1	1	0	1	0	0	1	1	0	0	1	1	0	0	0
Kar_Har_21	KAR_HAR	KAR	HAR	H	1	1	0	0	1	1	0	1	0	1	0	1	0	0	0	1	0	1	0	0	0	1	0	1	0	0	1	0	0	0	1	1	1	1	0	0	0	1	0	0	1	1	0	0	0
Kar_Har_22	KAR_HAR	KAR	HAR	T	2	1	0	1	0	0	1	0	0	1	0	1	0	0	0	1	1	0	1	0	0	1	0	1	0	1	1	0	0	1	1	1	0	1	0	1	0	0	0	1	1	0	0	0	0
Kar_Har_23	KAR_HAR	KAR	HAR	E	0	0	0	0	0	1	0	0	0	0	1	1	0	0	0	1	1	0	1	1	1	1	0	1	0	1	1	0	0	0	1	1	0	1	0	0	1	0	0	0	1	1	1	0	0
Kar_Har_24	KAR_HAR	KAR	HAR	H	1	0	0	0	0	0	0	0	0	0	0	0	0	0	0	1	0	0	0	0	0	0	0	0	0	0	1	0	0	0	1	1	0	0	0	0	0	0	0	0	0	1	0	0	0
Kar_Har_25	KAR_HAR	KAR	HAR	T	2	0	0	0	0	0	0	0	1	0	0	0	0	0	0	0	0	0	0	0	0	1	0	0	1	0	1	0	0	0	0	0	0	1	0	0	0	0	0	0	0	0	0	0	0
Kar_Har_26	KAR_HAR	KAR	HAR	E	0	1	1	1	0	0	1	0	1	1	0	1	0	1	0	1	0	0	1	0	1	0	0	0	1	0	1	0	0	0	1	1	0	1	0	0	1	1	0	0	0	0	0	1	1
Kar_Har_27	KAR_HAR	KAR	HAR	H	1	0	0	0	0	0	0	0	0	1	0	1	0	0	0	0	0	0	0	0	1	1	0	1	0	0	1	0	0	0	1	1	0	1	0	0	0	0	0	0	0	0	1	0	0
Kar_Har_28	KAR_HAR	KAR	HAR	T	2	0	0	1	0	0	0	1	0	1	0	0	0	1	0	1	0	0	0	0	1	1	0	0	0	0	1	0	1	0	0	0	0	1	0	0	0	1	0	0	0	1	0	0	0
Kar_Har_29	KAR_HAR	KAR	HAR	NA	NA	0	0	1	0	1	1	0	1	0	1	0	0	0	0	1	0	0	0	0	0	1	0	0	1	1	1	1	0	0	0	0	1	1	0	0	0	0	0	0	1	0	0	0	0
Kar_Har_30	KAR_HAR	KAR	HAR	NA	NA	1	0	1	0	1	1	0	1	0	0	0	0	0	0	1	0	0	0	1	1	1	0	1	1	0	1	0	0	0	1	1	0	1	0	0	1	1	0	0	0	0	0	0	0
Kar_Ref_04	KAR_REF	KAR	REF	T	2	0	0	1	0	0	0	1	1	1	0	0	0	0	0	1	0	0	0	0	0	0	0	1	0	0	1	0	0	0	1	1	0	1	0	0	0	1	0	0	1	1	0	1	1
Kar_Ref_05	KAR_REF	KAR	REF	NA	NA	1	0	1	1	0	1	0	1	1	1	1	0	0	0	1	1	0	1	0	0	1	0	1	1	0	1	0	0	0	1	1	0	1	0	0	1	1	0	0	0	0	0	0	0
Kar_Ref_06	KAR_REF	KAR	REF	NA	NA	0	1	1	0	0	1	0	1	1	0	1	0	1	1	0	1	0	1	0	1	1	0	1	1	1	1	1	0	0	1	1	0	1	0	0	1	1	0	0	1	1	0	1	0
Kar_Ref_07	KAR_REF	KAR	REF	E	0	0	0	1	0	1	0	0	0	0	0	1	0	0	0	1	0	0	1	0	1	0	0	1	0	0	1	0	0	0	1	1	0	1	0	0	0	0	0	0	1	0	1	0	0
Kar_Ref_08	KAR_REF	KAR	REF	E	0	0	0	0	0	0	0	0	0	0	0	1	0	0	0	1	0	0	0	0	0	0	0	0	0	0	1	0	0	0	1	0	1	1	0	0	0	0	0	0	1	0	0	1	0
Kar_Ref_09	KAR_REF	KAR	REF	NA	NA	1	0	1	0	0	1	0	0	1	0	0	1	0	0	1	1	0	0	0	0	1	0	0	1	0	1	0	0	0	1	0	0	1	0	0	0	1	0	0	0	1	0	0	0
Kar_Ref_10	KAR_REF	KAR	REF	E	0	0	0	0	0	0	0	0	0	0	0	1	0	0	0	1	0	0	0	0	1	0	0	0	0	1	1	0	0	0	0	0	0	1	0	0	0	0	0	1	0	0	0	0	0
Kar_Ref_11	KAR_REF	KAR	REF	H	1	1	0	1	0	0	1	1	1	1	0	1	0	0	0	1	0	0	1	0	0	1	1	0	1	0	1	0	0	0	1	0	1	1	0	0	0	0	0	0	0	1	0	1	0
Kar_Ref_12	KAR_REF	KAR	REF	H	1	0	1	1	1	1	0	0	1	0	1	1	0	0	0	1	1	1	1	0	1	1	0	0	1	0	1	0	0	0	0	1	1	1	1	0	1	1	0	0	1	0	0	1	0
Kar_Ref_13	KAR_REF	KAR	REF	H	1	0	0	1	0	0	0	1	0	0	0	1	0	0	0	0	1	0	0	0	0	0	0	1	0	0	1	0	0	0	1	0	0	1	0	0	0	0	0	0	0	1	0	1	0
Kar_Ref_14	KAR_REF	KAR	REF	NA	NA	1	0	0	0	1	0	0	1	1	0	1	0	0	0	0	0	1	0	1	1	1	0	1	1	0	1	0	0	0	1	1	0	1	1	0	0	0	0	1	1	1	0	1	0
Kar_Ref_15	KAR_REF	KAR	REF	NA	NA	0	1	1	0	0	0	1	0	1	0	1	0	0	0	1	0	0	0	0	0	1	0	1	1	1	1	0	0	0	1	0	0	1	0	0	0	1	0	0	0	0	0	1	0
Kar_Ref_16	KAR_REF	KAR	REF	T	2	0	0	1	0	0	1	1	1	1	0	1	0	0	0	1	1	0	0	0	0	1	0	0	1	0	1	0	0	0	0	0	0	1	0	0	1	1	0	0	0	0	1	0	0
Kar_Ref_17	KAR_REF	KAR	REF	E	0	1	1	1	0	1	0	1	1	0	1	1	0	0	0	1	0	0	0	1	0	1	1	1	0	0	1	0	0	0	1	1	0	1	0	0	1	0	0	0	1	0	0	1	0
Kar_Ref_18	KAR_REF	KAR	REF	E	0	1	1	1	0	1	1	0	0	0	0	1	0	1	0	1	0	0	0	0	0	0	1	1	0	0	1	1	0	0	0	1	1	1	0	0	0	1	1	0	0	1	0	0	0
Kar_Ref_19	KAR_REF	KAR	REF	H	1	0	0	0	0	1	0	0	1	0	0	1	0	0	0	1	0	0	0	0	0	0	0	0	0	0	1	0	0	0	1	0	0	0	0	0	0	0	0	1	0	0	1	0	0
Kar_Ref_20	KAR_REF	KAR	REF	H	1	1	0	1	0	1	1	1	1	0	1	1	0	0	0	1	1	1	0	0	0	0	0	1	1	0	0	0	0	0	1	0	0	1	0	0	0	0	0	0	0	0	0	0	0
Kar_Ref_21	KAR_REF	KAR	REF	NA	NA	1	1	1	0	0	1	1	1	1	0	1	0	1	0	1	1	0	0	1	1	1	0	0	1	1	1	0	0	0	1	0	1	1	1	0	1	1	0	0	0	1	0	1	1
Kar_Ref_22	KAR_REF	KAR	REF	H	1	0	0	0	0	0	0	1	0	1	0	0	0	0	1	1	0	0	0	0	0	0	0	0	0	0	1	0	0	0	0	1	0	0	0	0	0	0	0	0	1	1	0	0	1
Kar_Ref_23	KAR_REF	KAR	REF	E	0	0	0	0	0	0	0	0	0	0	0	0	0	1	1	1	0	0	0	0	0	0	0	1	0	0	1	0	0	0	0	1	0	0	0	0	0	0	0	0	1	1	1	0	1
Kar_Ref_24	KAR_REF	KAR	REF	NA	NA	0	0	1	0	0	0	0	0	1	0	1	0	0	0	1	0	0	0	0	0	1	0	1	0	0	1	0	0	1	1	1	0	1	0	1	0	0	0	0	0	1	1	0	0
Kar_Ref_25	KAR_REF	KAR	REF	E	0	1	0	1	0	0	0	0	1	0	0	0	0	0	0	1	0	0	0	0	0	0	0	0	0	0	1	0	0	0	0	1	0	1	0	0	0	0	0	0	0	1	0	0	1
Kar_Ref_26	KAR_REF	KAR	REF	H	1	0	0	0	0	0	0	0	0	0	0	0	0	0	0	1	0	0	0	0	0	0	0	0	0	0	1	0	0	0	0	0	0	1	0	0	0	0	0	0	0	0	0	1	0
Kar_Ref_27	KAR_REF	KAR	REF	E	0	0	1	0	0	0	1	0	1	0	0	1	0	0	0	1	1	0	1	0	0	1	1	1	0	0	1	0	0	0	1	1	1	1	0	0	0	1	0	1	0	1	0	1	0
Kar_Ref_28	KAR_REF	KAR	REF	E	0	0	0	0	0	0	0	1	0	1	0	1	0	0	0	0	0	0	0	0	0	1	0	1	0	0	1	0	0	0	1	1	1	1	1	0	0	0	0	0	1	1	0	1	0
Kar_Ref_29	KAR_REF	KAR	REF	E	0	0	0	0	0	0	0	0	0	0	1	1	0	0	0	1	1	0	0	0	0	1	0	0	0	0	1	0	0	0	1	1	1	0	0	1	0	0	0	0	0	0	0	0	0
Kar_Ref_30	KAR_REF	KAR	REF	E	0	1	0	1	0	0	0	0	1	1	0	1	0	0	1	0	0	1	1	0	0	1	0	1	0	0	1	0	0	0	1	1	0	1	0	0	0	1	0	0	0	0	0	1	0
GDA_Har_01	GDA_HAR	GDA	HAR	T	2	1	0	1	0	0	0	0	1	0	0	1	0	0	0	1	0	1	0	0	0	0	0	1	1	0	1	0	0	0	1	1	0	1	0	0	0	0	0	0	1	0	1	1	0
GDA_Har_02	GDA_HAR	GDA	HAR	H	1	0	0	0	0	1	1	0	0	1	1	0	0	0	0	1	1	0	1	1	0	0	0	0	0	0	1	0	0	0	1	1	0	1	0	0	0	0	0	0	0	1	0	0	0
GDA_Har_03	GDA_HAR	GDA	HAR	E	0	1	0	1	0	0	0	0	0	1	0	0	0	0	0	1	1	0	0	0	1	1	0	1	1	0	1	0	0	0	1	1	0	1	1	0	1	1	0	0	0	1	0	1	0
GDA_Har_04	GDA_HAR	GDA	HAR	E	0	0	0	0	0	0	0	0	1	0	0	1	0	0	0	1	0	0	0	0	0	1	0	1	0	0	1	0	0	0	1	1	0	1	0	0	0	0	0	0	0	0	0	0	0
GDA_Har_05	GDA_HAR	GDA	HAR	H	1	0	0	1	0	0	0	0	1	0	0	1	0	0	0	1	0	0	0	0	1	1	0	0	0	0	1	0	0	0	1	0	1	1	0	0	1	0	0	1	0	1	0	0	0
GDA_Har_06	GDA_HAR	GDA	HAR	T	2	0	1	1	0	0	0	0	1	1	0	1	0	0	1	1	0	0	0	0	1	1	0	0	0	0	1	0	0	0	1	0	1	1	0	0	0	0	0	1	0	0	1	0	0
GDA_Har_07	GDA_HAR	GDA	HAR	H	1	1	1	1	0	0	1	1	0	1	0	1	0	0	0	1	0	0	0	1	0	1	1	0	1	1	1	1	0	0	1	1	0	1	1	0	1	0	0	0	1	0	1	1	1
GDA_Har_08	GDA_HAR	GDA	HAR	E	0	0	0	0	0	0	0	0	1	1	0	1	0	0	0	1	0	0	0	0	0	0	1	0	0	0	1	0	0	0	0	1	0	1	0	0	1	1	0	1	1	1	1	0	0
GDA_Har_09	GDA_HAR	GDA	HAR	H	1	0	0	1	0	1	0	1	0	0	0	1	0	0	0	1	1	0	0	0	0	1	0	0	1	0	1	0	0	0	1	1	1	1	0	0	1	0	0	0	0	0	0	0	0
GDA_Har_10	GDA_HAR	GDA	HAR	H	1	0	1	1	0	1	0	1	1	1	0	1	0	0	0	1	0	0	0	0	1	1	0	1	1	0	1	1	0	0	1	1	1	1	1	0	1	0	0	1	0	1	0	0	0
GDA_Har_11	GDA_HAR	GDA	HAR	E	0	0	1	1	0	0	1	0	1	0	0	1	0	0	0	1	1	1	1	0	1	0	0	1	1	1	1	0	1	0	1	1	0	1	1	0	1	1	0	0	0	1	0	1	0
GDA_Har_12	GDA_HAR	GDA	HAR	E	0	1	0	0	0	0	0	0	0	1	0	1	0	0	0	0	0	0	0	0	0	0	0	1	0	0	1	0	0	0	1	1	0	1	0	1	0	0	0	0	1	0	1	0	0
GDA_Har_13	GDA_HAR	GDA	HAR	H	1	0	0	1	0	1	0	0	1	0	0	0	1	0	0	0	1	0	0	0	0	0	0	1	0	0	1	0	0	0	1	1	0	1	0	1	0	1	0	0	1	0	0	0	0
GDA_Har_14	GDA_HAR	GDA	HAR	E	0	0	0	0	1	0	1	1	0	0	0	1	0	0	0	1	0	0	0	0	0	0	0	1	0	0	1	0	0	0	1	1	0	1	0	0	0	1	0	0	1	1	0	0	0
GDA_Har_21	GDA_HAR	GDA	HAR	T	2	0	0	1	0	1	1	0	0	0	0	1	0	0	0	0	0	0	0	0	0	1	0	0	0	0	1	0	0	0	1	1	0	1	0	0	0	0	1	0	1	1	0	0	0
GDA_Har_22	GDA_HAR	GDA	HAR	E	0	0	0	0	0	0	0	0	1	0	0	1	0	0	0	0	0	0	0	0	0	0	1	1	0	0	1	0	0	0	1	1	0	1	0	0	1	0	0	0	1	1	0	0	0
GDA_Har_23	GDA_HAR	GDA	HAR	E	0	0	0	0	0	0	0	0	0	0	0	0	0	0	0	0	0	0	0	0	0	0	0	0	0	0	1	0	0	0	1	1	0	0	0	1	1	0	0	0	0	1	0	0	0
GDA_Har_24	GDA_HAR	GDA	HAR	E	0	0	0	0	0	0	0	0	0	0	0	0	0	0	0	1	0	0	0	0	0	0	0	0	0	0	1	0	0	0	1	1	0	1	0	0	0	0	0	0	1	1	0	0	1
GDA_Har_25	GDA_HAR	GDA	HAR	E	0	1	0	0	0	0	1	1	0	0	0	0	0	0	0	1	0	0	0	0	0	0	0	1	0	0	1	0	0	0	0	0	1	1	0	0	0	0	0	0	1	1	0	0	1
GDA_Har_26	GDA_HAR	GDA	HAR	H	1	1	0	0	0	0	0	0	1	0	0	1	0	0	0	1	0	0	0	0	0	0	0	0	0	0	1	0	0	0	1	1	0	1	0	1	0	0	0	0	1	1	0	0	1
GDA_Har_27	GDA_HAR	GDA	HAR	H	1	0	1	1	0	0	0	0	0	1	0	0	0	0	0	1	0	0	0	0	0	0	0	0	0	0	1	0	0	0	0	1	0	1	0	0	0	0	0	1	0	1	0	0	1
GDA_Har_28	GDA_HAR	GDA	HAR	E	0	0	0	0	0	0	0	0	0	0	0	1	0	0	0	1	0	0	0	0	0	0	0	0	0	0	1	0	0	0	1	1	0	0	0	0	0	0	0	0	1	0	0	0	1
GDA_Har_29	GDA_HAR	GDA	HAR	E	0	0	0	0	0	0	1	0	0	1	1	0	0	0	0	1	0	0	0	0	0	0	0	0	0	0	1	0	0	0	0	0	1	1	0	0	0	0	0	0	0	0	0	0	0
GDA_Har_30	GDA_HAR	GDA	HAR	E	0	1	1	0	0	0	0	0	0	0	0	0	0	0	0	1	0	0	0	0	0	0	0	0	0	0	1	0	0	0	1	1	0	0	0	1	1	0	0	0	0	1	0	0	0
GDA_Ref_01	GDA_REF	GDA	REF	E	0	0	1	1	0	0	1	0	0	1	0	1	0	0	0	1	0	0	0	0	0	0	0	0	1	0	1	0	0	0	1	0	1	1	0	1	0	0	0	0	0	1	0	0	0
GDA_Ref_02	GDA_REF	GDA	REF	H	1	1	1	1	0	1	0	1	1	0	0	1	0	0	0	1	1	0	0	0	1	1	0	0	1	1	1	1	0	0	0	1	0	1	0	0	0	0	0	0	0	0	0	1	0
GDA_Ref_03	GDA_REF	GDA	REF	E	0	1	0	1	0	1	1	0	0	0	0	1	0	1	0	1	0	0	0	0	1	1	0	0	1	0	1	0	0	0	1	0	0	1	0	0	0	0	0	0	0	1	0	0	0
GDA_Ref_04	GDA_REF	GDA	REF	E	0	1	1	1	0	1	0	1	0	0	1	1	0	0	0	1	0	0	0	0	0	1	1	1	0	0	1	1	0	0	1	1	0	1	0	0	0	0	0	0	1	1	0	0	0
GDA_Ref_05	GDA_REF	GDA	REF	T	2	0	0	1	0	0	0	0	1	0	0	1	0	0	0	0	0	0	0	0	0	0	0	1	0	0	1	0	0	0	1	1	0	1	0	0	0	0	0	0	0	1	0	1	0
GDA_Ref_06	GDA_REF	GDA	REF	H	1	0	1	1	0	1	1	0	1	0	0	0	0	0	0	0	0	0	1	0	0	0	0	1	0	0	1	0	0	0	1	1	0	1	0	0	1	0	0	0	1	1	0	0	0
GDA_Ref_07	GDA_REF	GDA	REF	E	0	0	0	1	0	0	0	0	1	0	0	1	0	0	0	1	0	0	0	0	0	1	0	0	0	0	1	0	1	0	1	1	0	0	1	0	1	0	0	0	0	1	1	0	0
GDA_Ref_08	GDA_REF	GDA	REF	H	1	1	0	1	0	0	0	0	0	0	0	1	0	0	0	1	0	0	1	0	0	0	0	0	0	0	1	1	0	0	1	1	0	1	0	0	0	0	0	1	0	1	0	0	0
GDA_Ref_09	GDA_REF	GDA	REF	H	1	0	1	1	0	0	1	0	1	1	1	1	0	0	0	1	0	1	1	0	0	1	0	0	1	0	1	0	0	0	1	0	1	1	0	0	1	1	0	0	0	1	0	0	0
GDA_Ref_10	GDA_REF	GDA	REF	H	1	1	0	1	1	0	0	0	1	1	0	0	0	0	0	0	0	1	0	0	0	1	0	0	1	0	1	0	0	1	1	1	0	0	0	0	0	0	0	0	1	1	0	0	0
GDA_Ref_11	GDA_REF	GDA	REF	E	0	0	1	1	0	1	0	0	0	1	1	0	0	0	0	1	1	0	0	0	0	0	0	0	1	1	1	0	1	0	0	0	0	1	1	0	0	1	0	0	0	1	0	1	0
GDA_Ref_12	GDA_REF	GDA	REF	H	1	0	0	0	0	0	0	0	0	0	0	1	0	0	1	1	1	0	0	0	0	0	0	1	0	0	1	0	0	1	1	0	1	1	1	0	0	0	0	0	0	1	0	0	0
GDA_Ref_13	GDA_REF	GDA	REF	E	0	0	1	1	0	1	0	0	0	0	1	1	0	0	0	1	0	1	0	0	0	0	0	1	0	0	1	0	0	1	1	0	0	1	0	0	0	0	0	0	1	1	1	0	0
GDA_Ref_14	GDA_REF	GDA	REF	H	1	0	0	1	0	1	0	1	1	0	0	1	0	0	0	1	1	0	0	0	0	1	0	1	0	0	1	1	1	0	1	1	1	1	0	0	0	0	0	0	0	1	1	0	0
GDA_Ref_15	GDA_REF	GDA	REF	T	2	0	1	0	0	0	0	0	1	0	0	0	0	0	0	0	0	0	0	0	1	1	0	1	0	0	1	0	0	0	1	1	0	1	0	0	1	0	1	0	1	0	0	0	0
GDA_Ref_16	GDA_REF	GDA	REF	E	0	0	0	1	0	0	1	0	1	0	0	0	0	0	0	1	0	0	1	0	1	1	0	1	0	0	1	0	0	0	1	1	1	1	1	1	0	0	0	1	1	1	0	0	0
GDA_Ref_17	GDA_REF	GDA	REF	H	1	0	1	0	0	0	0	1	1	0	0	0	0	0	1	1	0	0	1	0	0	0	0	0	1	0	1	1	0	0	1	1	1	1	1	0	0	1	0	0	0	0	1	0	0
GDA_Ref_18	GDA_REF	GDA	REF	H	1	1	0	0	0	0	0	0	0	0	0	1	0	0	0	1	0	0	0	0	0	0	0	0	0	0	1	0	0	0	1	1	0	0	0	0	0	0	0	0	1	1	0	0	0
GDA_Ref_19	GDA_REF	GDA	REF	E	0	0	1	1	0	0	1	0	0	0	1	0	0	0	0	1	0	0	0	0	1	1	0	0	1	1	1	0	0	0	1	1	0	0	0	0	0	0	0	0	0	1	0	0	0
GDA_Ref_20	GDA_REF	GDA	REF	T	2	0	0	1	0	1	0	0	0	1	0	1	0	1	0	1	0	0	0	0	1	1	1	1	0	0	0	0	0	0	1	1	0	1	0	0	0	0	0	0	0	1	1	0	0
GDA_Ref_21	GDA_REF	GDA	REF	H	1	0	1	1	0	1	0	1	1	1	0	0	1	0	0	1	1	0	0	0	0	1	1	1	1	1	1	0	0	0	1	1	0	1	0	0	0	0	0	0	0	0	1	1	0
GDA_Ref_22	GDA_REF	GDA	REF	E	0	0	1	1	0	0	1	1	0	1	0	1	0	0	1	0	0	0	0	0	0	0	0	0	0	0	1	0	0	0	1	1	1	1	0	0	0	0	0	0	1	1	0	0	0
GDA_Ref_23	GDA_REF	GDA	REF	E	0	0	0	1	0	1	0	1	0	0	0	1	0	0	0	0	0	0	0	0	0	0	0	1	1	0	1	0	1	0	1	1	1	0	0	0	1	0	0	0	0	1	0	1	0
GDA_Ref_24	GDA_REF	GDA	REF	E	0	1	1	0	0	0	0	1	1	0	1	0	1	1	0	1	0	1	0	1	0	0	0	0	1	0	1	0	0	0	1	0	0	1	0	0	1	0	0	0	1	0	0	0	0
GDA_Ref_25	GDA_REF	GDA	REF	E	0	0	0	0	0	0	0	0	0	0	0	0	0	0	0	0	1	0	0	0	0	0	0	0	1	0	1	0	0	0	1	1	0	1	1	0	1	0	0	1	0	1	1	0	0
GDA_Ref_26	GDA_REF	GDA	REF	E	0	1	0	1	0	0	0	0	1	0	1	0	0	0	0	0	0	0	1	0	0	0	1	1	0	0	1	1	0	0	1	0	1	1	0	1	0	1	0	0	1	1	1	0	0
GDA_Ref_27	GDA_REF	GDA	REF	H	1	0	0	0	0	0	1	0	1	0	0	1	0	0	0	1	1	0	0	0	0	0	0	0	0	0	1	1	0	0	1	0	1	1	0	0	1	1	0	0	0	0	1	0	0
GDA_Ref_28	GDA_REF	GDA	REF	H	1	0	0	0	0	0	0	0	0	0	0	0	0	0	0	1	0	0	0	0	0	0	0	0	0	0	1	0	0	0	0	1	0	1	0	0	0	0	0	0	0	1	0	0	0
GDA_Ref_29	GDA_REF	GDA	REF	E	0	0	0	1	0	0	0	0	0	0	0	1	0	0	0	1	0	0	1	0	0	1	0	1	0	0	1	1	0	0	1	1	0	1	0	0	1	0	0	0	0	1	0	0	0
GDA_Ref_30	GDA_REF	GDA	REF	H	1	0	0	0	0	1	0	0	0	0	0	0	0	0	0	1	1	0	0	0	0	0	0	0	0	0	1	0	0	0	0	1	0	1	0	0	0	0	0	0	1	1	0	0	0
KRI_Har_02	KRI_HAR	KRI	HAR	E	0	1	1	1	0	0	1	0	1	0	1	1	0	1	0	1	0	0	0	0	0	1	1	0	1	1	0	0	0	0	0	1	1	1	1	1	0	0	0	0	0	1	1	0	0
KRI_Har_03	KRI_HAR	KRI	HAR	E	0	1	0	1	0	1	1	0	1	1	1	1	0	1	0	1	0	0	1	0	0	1	0	1	0	1	1	0	0	0	1	1	0	1	1	0	1	1	0	0	0	1	1	0	1
KRI_Har_04	KRI_HAR	KRI	HAR	E	0	0	1	1	0	1	0	0	1	1	0	1	0	1	0	1	1	1	1	0	0	0	0	0	1	1	0	1	0	0	1	1	0	1	0	1	1	1	0	1	0	0	1	0	1
KRI_Har_06	KRI_HAR	KRI	HAR	E	0	1	1	1	0	1	1	0	1	1	1	1	0	1	0	1	0	1	0	1	0	1	0	0	1	1	1	1	0	1	1	1	0	1	1	0	1	1	0	0	0	0	1	0	1
KRI_Har_07	KRI_HAR	KRI	HAR	E	0	0	0	1	0	0	0	0	0	1	0	1	0	0	0	0	0	0	0	0	1	0	1	0	0	0	0	0	0	0	0	0	0	0	0	0	0	0	0	0	0	0	0	0	0
KRI_Har_08	KRI_HAR	KRI	HAR	H	1	0	1	1	0	1	1	0	1	1	0	0	0	1	0	1	0	0	1	0	1	0	0	0	1	0	0	0	0	0	0	1	1	0	0	0	1	1	0	0	0	0	0	0	0
KRI_Har_09	KRI_HAR	KRI	HAR	E	0	0	0	1	0	0	0	0	1	0	0	1	0	1	0	1	0	0	0	0	1	0	0	0	1	0	0	0	0	0	0	0	0	0	0	0	0	0	0	0	0	0	0	0	0
KRI_Har_10	KRI_HAR	KRI	HAR	E	0	0	0	1	0	0	0	1	1	0	0	1	0	0	0	0	0	0	0	0	0	0	0	0	0	0	0	0	0	0	0	0	0	0	0	0	0	0	0	0	0	0	0	0	0
KRI_Har_11	KRI_HAR	KRI	HAR	E	0	0	1	1	0	0	0	1	1	0	0	0	1	0	0	1	1	0	0	0	1	1	0	1	0	0	0	0	0	0	0	0	0	0	1	0	1	0	0	0	0	1	0	0	1
KRI_Har_13	KRI_HAR	KRI	HAR	E	0	1	1	1	0	0	1	1	0	1	0	1	0	0	0	1	0	0	0	0	1	0	1	0	0	0	0	0	0	0	1	0	0	0	0	0	1	0	0	1	0	0	0	1	1
KRI_Har_14	KRI_HAR	KRI	HAR	E	0	1	0	1	0	1	0	1	0	1	0	1	0	1	0	1	0	0	1	0	0	1	1	0	1	1	0	1	0	0	1	1	0	1	0	1	1	0	0	0	0	0	0	1	0
KRI_Har_15	KRI_HAR	KRI	HAR	E	0	1	1	1	0	0	0	1	0	1	0	0	0	0	0	1	0	0	0	0	1	0	0	0	0	0	0	0	0	1	0	0	0	0	0	0	1	1	0	0	0	1	0	0	1
KRI_Har_16	KRI_HAR	KRI	HAR	E	0	0	0	1	0	1	0	0	1	1	0	0	0	0	0	1	0	0	0	0	0	0	0	1	0	0	0	0	0	0	1	0	1	0	1	0	1	1	1	0	1	0	0	0	0
KRI_Har_17	KRI_HAR	KRI	HAR	E	0	1	0	1	0	0	0	1	0	0	1	1	0	0	0	1	0	0	0	0	0	1	0	0	0	0	0	1	1	0	1	0	0	0	0	0	0	1	0	0	0	0	1	0	0
KRI_Har_18	KRI_HAR	KRI	HAR	E	0	1	1	1	0	0	0	0	1	0	0	1	0	0	0	1	0	0	0	0	1	0	0	0	0	0	0	0	0	0	1	0	0	0	0	0	0	0	0	0	0	0	0	0	0
KRI_Har_19	KRI_HAR	KRI	HAR	E	0	0	0	1	0	0	0	0	0	1	0	0	0	0	0	1	0	0	0	0	0	0	0	0	0	1	0	0	0	0	1	0	0	0	1	0	0	0	0	0	0	0	0	0	0
KRI_Har_20	KRI_HAR	KRI	HAR	E	0	0	1	1	0	1	1	0	1	1	0	1	0	0	1	1	1	1	0	1	1	0	1	0	1	0	0	0	0	0	1	1	1	1	0	0	1	0	0	0	0	1	0	1	0
KRI_Har_21	KRI_HAR	KRI	HAR	E	0	0	1	1	0	0	0	0	0	0	1	0	0	0	0	1	0	0	0	0	0	0	0	0	0	0	0	0	0	0	0	1	1	0	0	0	0	0	0	0	0	0	0	0	0
KRI_Har_22	KRI_HAR	KRI	HAR	E	0	1	0	1	0	0	0	0	0	0	0	0	0	0	0	1	0	0	0	0	0	0	0	0	0	0	0	0	0	0	0	0	0	0	0	1	0	0	0	0	0	0	0	0	0
KRI_Har_23	KRI_HAR	KRI	HAR	E	0	0	0	0	0	0	0	0	0	0	0	0	0	0	0	1	0	0	0	0	0	1	1	0	0	0	0	0	0	0	0	0	0	0	0	0	1	0	0	0	0	0	0	0	0
KRI_Har_24	KRI_HAR	KRI	HAR	E	0	1	0	1	0	0	0	0	1	1	0	1	0	0	0	1	0	1	1	0	0	0	0	0	0	1	0	0	0	1	0	0	1	1	0	0	1	1	0	0	1	0	0	0	1
KRI_Har_25	KRI_HAR	KRI	HAR	E	0	0	0	0	0	0	0	0	0	0	0	0	0	0	0	1	0	0	0	0	0	0	0	0	0	0	0	0	0	0	1	0	0	0	0	1	0	0	0	0	1	0	0	0	0
KRI_Har_26	KRI_HAR	KRI	HAR	E	0	0	0	0	0	0	0	0	0	0	0	1	0	0	0	1	1	0	0	0	0	0	0	0	0	0	0	0	0	0	0	0	0	0	0	1	0	0	0	0	0	0	0	0	0
KRI_Har_27	KRI_HAR	KRI	HAR	E	0	1	0	0	0	0	0	0	0	0	0	0	0	1	0	1	0	0	0	0	0	0	0	0	0	0	0	0	0	0	1	0	0	0	0	0	0	0	0	0	0	0	0	0	0
KRI_Har_28	KRI_HAR	KRI	HAR	NA	NA	0	0	0	0	0	1	1	0	0	0	0	0	0	0	1	0	0	0	0	0	0	0	0	0	0	0	0	0	1	1	0	1	0	0	1	0	1	0	1	0	0	0	0	0
KRI_Har_29	KRI_HAR	KRI	HAR	E	0	0	0	0	0	0	0	0	1	0	0	0	0	0	0	1	0	0	0	0	0	0	0	0	1	0	0	0	0	0	0	0	0	0	0	1	0	0	0	0	1	1	0	0	0
KRI_Har_30	KRI_HAR	KRI	HAR	E	0	0	0	0	0	0	0	0	0	0	0	0	1	1	0	1	0	0	0	0	0	0	0	0	0	0	0	0	0	0	0	0	0	0	0	0	0	0	0	0	0	0	0	0	0
KRI_Ref_01	KRI_REF	KRI	REF	NA	NA	1	0	1	0	0	1	0	1	1	1	1	0	0	0	1	0	1	1	0	1	1	0	0	1	1	1	0	0	0	1	1	0	1	1	0	1	0	0	0	1	0	1	0	1
KRI_Ref_02	KRI_REF	KRI	REF	E	0	1	1	1	0	1	0	1	0	0	0	1	0	0	0	1	0	0	1	1	0	1	0	1	1	0	0	0	0	1	0	0	1	1	0	0	1	1	0	0	1	0	1	0	0
KRI_Ref_03	KRI_REF	KRI	REF	E	0	1	1	1	0	0	1	0	0	0	0	0	0	1	0	1	0	1	0	1	0	1	1	0	1	1	0	0	0	0	0	1	0	0	0	0	1	0	0	0	0	0	1	0	0
KRI_Ref_05	KRI_REF	KRI	REF	E	0	1	1	1	0	0	0	1	1	1	0	1	0	0	0	1	0	1	1	0	0	1	0	0	1	0	1	1	0	0	1	0	0	1	0	1	0	1	0	0	0	1	0	0	0
KRI_Ref_06	KRI_REF	KRI	REF	E	0	0	0	1	0	0	0	1	0	1	0	1	0	1	0	1	0	0	0	0	0	0	0	0	0	0	0	0	0	0	0	0	0	0	0	1	0	0	0	1	1	0	0	0	1
KRI_Ref_07	KRI_REF	KRI	REF	E	0	1	0	1	0	0	1	0	1	1	1	1	0	1	0	0	0	1	1	0	1	1	0	0	1	1	1	1	0	0	1	1	0	1	1	0	1	1	0	1	0	0	1	0	1
KRI_Ref_08	KRI_REF	KRI	REF	E	0	0	0	1	0	0	1	0	1	1	0	0	0	1	0	1	0	0	0	0	0	1	0	0	1	1	0	0	0	0	0	1	1	1	0	0	0	1	0	0	0	0	0	0	0
KRI_Ref_09	KRI_REF	KRI	REF	NA	NA	1	0	1	0	1	0	1	0	1	0	0	0	0	1	1	1	1	0	0	1	0	0	1	1	0	1	0	0	0	1	1	0	1	1	1	1	0	0	0	0	0	0	1	0
KRI_Ref_11	KRI_REF	KRI	REF	E	0	0	0	1	0	0	0	0	1	0	0	0	0	0	0	1	0	0	1	0	0	0	0	0	0	1	0	0	0	1	0	1	0	0	0	0	1	0	0	1	0	0	0	0	1
KRI_Ref_12	KRI_REF	KRI	REF	E	0	0	0	1	1	0	0	0	1	0	0	0	0	0	0	1	0	0	0	0	0	0	1	1	0	0	1	0	1	0	1	0	0	1	0	1	0	0	0	1	0	0	0	0	0
KRI_Ref_13	KRI_REF	KRI	REF	NA	NA	0	1	1	0	1	1	0	1	1	1	1	1	1	0	1	0	0	1	0	0	1	0	1	1	0	0	0	0	0	0	1	0	0	0	0	0	0	0	0	0	0	0	0	0
KRI_Ref_14	KRI_REF	KRI	REF	E	0	0	1	1	0	0	0	0	1	0	0	1	1	0	0	0	0	0	0	0	0	1	0	0	0	0	0	1	0	0	0	0	0	1	0	1	0	0	0	0	0	0	0	0	0
KRI_Ref_15	KRI_REF	KRI	REF	E	0	1	0	1	0	1	1	1	0	1	0	1	0	1	0	1	0	1	1	0	1	1	1	1	0	1	1	0	0	0	1	1	0	1	0	0	1	0	0	1	0	1	0	0	0
KRI_Ref_16	KRI_REF	KRI	REF	NA	NA	1	0	1	0	0	0	0	1	1	0	1	0	0	0	1	0	0	1	0	0	0	0	0	1	0	1	1	0	0	0	1	0	0	0	0	1	0	0	0	0	1	0	1	0
KRI_Ref_17	KRI_REF	KRI	REF	E	0	1	1	1	0	1	1	0	0	0	0	0	0	0	1	0	0	0	0	0	1	0	0	1	0	0	0	0	0	0	1	1	0	0	0	0	0	0	0	0	0	0	0	0	0
KRI_Ref_18	KRI_REF	KRI	REF	E	0	1	0	1	0	0	0	0	1	1	0	1	0	0	0	1	0	0	0	0	0	0	0	0	1	1	0	0	1	0	0	0	0	0	1	0	0	0	0	0	0	0	0	0	1
KRI_Ref_19	KRI_REF	KRI	REF	E	0	1	1	1	0	0	0	0	1	0	0	0	0	1	0	1	1	0	0	0	0	0	1	0	0	1	0	1	0	0	1	0	0	1	0	1	1	0	0	0	0	0	0	0	1
KRI_Ref_20	KRI_REF	KRI	REF	H	1	0	1	1	0	1	0	1	1	0	0	0	0	0	0	1	0	0	0	0	0	0	1	0	1	0	0	0	0	0	0	0	0	1	0	0	0	1	0	0	1	1	0	0	0
KRI_Ref_21	KRI_REF	KRI	REF	E	0	0	1	0	0	0	0	1	1	0	0	0	1	1	0	1	1	0	0	1	1	1	0	0	0	1	0	1	0	0	1	0	0	0	1	1	1	1	0	0	0	0	0	0	0
KRI_Ref_22	KRI_REF	KRI	REF	E	0	0	0	1	0	1	1	0	0	1	0	0	0	0	0	1	1	0	1	0	1	0	1	1	1	0	0	1	0	0	1	1	1	1	0	1	1	1	0	0	0	0	0	0	1
KRI_Ref_23	KRI_REF	KRI	REF	E	0	0	1	1	0	1	0	0	1	1	0	1	0	0	0	1	0	0	0	0	0	1	1	0	0	0	0	1	0	0	1	1	0	1	0	1	0	1	1	0	0	1	0	0	0
KRI_Ref_24	KRI_REF	KRI	REF	E	0	0	1	0	0	1	1	0	1	1	0	0	0	0	0	1	0	0	1	0	0	0	0	0	0	1	0	1	0	0	1	1	0	1	0	1	1	1	1	0	0	0	1	0	0
KRI_Ref_25	KRI_REF	KRI	REF	E	0	0	0	1	0	1	0	1	1	1	0	1	0	0	0	1	0	0	0	0	0	1	0	0	0	0	0	1	0	0	1	1	0	1	0	1	1	1	0	1	0	0	1	1	1
KRI_Ref_26	KRI_REF	KRI	REF	NA	NA	1	0	1	0	0	0	0	0	0	0	0	0	0	0	0	0	0	0	0	0	0	0	0	0	0	1	1	0	0	0	0	0	1	1	0	0	0	0	0	0	0	0	0	0
KRI_Ref_27	KRI_REF	KRI	REF	E	0	0	0	0	0	0	0	0	0	0	0	0	0	1	0	1	0	0	0	0	0	0	0	0	0	0	0	0	0	0	0	0	0	0	0	0	0	0	0	0	0	0	0	0	0
KRI_Ref_28	KRI_REF	KRI	REF	E	0	1	0	1	0	0	0	0	0	0	0	0	0	0	0	0	0	0	0	0	0	0	0	0	0	0	1	1	0	0	1	0	1	1	0	0	0	0	0	0	0	0	0	0	0
KRI_Ref_29	KRI_REF	KRI	REF	E	0	0	1	1	0	0	1	1	1	0	0	0	0	0	0	1	0	0	0	1	0	0	0	0	0	1	0	0	1	0	1	0	1	0	1	0	1	0	1	0	0	0	0	0	0
KRI_Ref_30	KRI_REF	KRI	REF	E	0	1	0	1	0	0	1	1	0	1	0	1	0	1	0	1	0	0	1	0	1	1	0	0	0	0	1	0	0	0	1	0	1	1	0	0	0	1	0	1	0	0	0	0	0
[truncated: 310 more columns]
